# Supplementary material for: Gold(i)-catalyzed cycloisomerization of alcohol or amine tethered-vinylidenecyclopropanes providing access to morpholine, piperazine or oxazepane derivatives: a carbene versus non-carbene process
Source: Royal Society of Chemistry journal article supplement (doi:10.1039/d3qo00085k), 2023-01-01
Supplement: d3qo00085k1.pdf [file d3qo00085k1.pdf]

## Supporting Information

### Gold-catalyzed cycloisomerization of alcohol or amine tethered-vinylidenecyclopropanes accessing to morpholine, piperazine or oxazepane derivatives: carbene versus non-carbene process

Jun-Sheng Wei,<sup>a</sup> Song Yang,<sup>a</sup> Yin Wei,<sup>b</sup> Sima Shamsaddinimotlagh,<sup>c</sup> Hossein Tavakol,<sup>c\*</sup> and Min Shi<sup>a, b\*</sup>

<sup>a</sup> Key Laboratory for Advanced Materials and Institute of Fine Chemicals, School of Chemistry & Molecular Engineering, East China University of Science and Technology, Mei-long Road No. 130, Shanghai, 200237 P. R. China.

<sup>b</sup> State Key Laboratory of Organometallic Chemistry, Center for Excellence in Molecular Synthesis, University of Chinese Academy of Sciences, Shanghai Institute of Organic Chemistry, Chinese Academy of Sciences, 345 Ling-ling Road, Shanghai 200032 P. R. China.

<sup>c</sup> Department of Chemistry, Isfahan University of Technology, Isfahan 84156-83111, Iran. E-mail: h\_tavakol@cc.iut.ac.ir and mshi@mail.sioc.ac.cn

### Contents

|    |                                                                                            |      |
|----|--------------------------------------------------------------------------------------------|------|
| 1  | General methods.....                                                                       | S2   |
| 2  | Preparation of the starting materials .....                                                | S3   |
| 3  | General procedure for the synthesis of compounds 2 and 2' .....                            | S5   |
| 4  | Experimental procedures for the transformations of the cyclization products 2a and 2q' ... | S5   |
| 5  | Control experiments .....                                                                  | S8   |
| 6  | Asymmetric studies .....                                                                   | S8   |
| 7  | Spectroscopic data.....                                                                    | S10  |
| 8  | X-ray crystal data .....                                                                   | S132 |
| 9  | Calculation details .....                                                                  | S135 |
| 10 | References .....                                                                           | S148 |

## 1 General methods

Melting points were determined on a digital melting point apparatus and temperatures were uncorrected.  $^1\text{H}$  NMR spectra were measured on a Bruker AC 400 or Agilent (400 MHz) spectrometer. Data were reported as follows: chemical shifts in ppm referenced to the internal solvent signal (peak at 0.00 ppm in the case of  $\text{CDCl}_3$  with tetramethylsilane as an internal standard), multiplicity (s = singlet, d = doublet, t = triplet, m = multiplet), coupling constants (Hz), and assignment.  $^{13}\text{C}$  NMR spectra were measured on a Bruker AC 400 (100 MHz) spectrometer with complete proton decoupling. Chemical shifts were reported in ppm from the internal solvent signal (peak at 77.000 ppm in the case of  $\text{CDCl}_3$ ). Infrared spectra were recorded on a Perkin-Elmer PE-983 spectrometer with absorption in  $\text{cm}^{-1}$ . Flash column chromatography was performed using 300-400 mesh silica gel. For thin-layer chromatography (TLC), silica gel plates (Huanghai GF254) were used. Chiral HPLC analysis was performed on a SHIMADZU SPD-10A vp series with chiral columns (Chiralpak IC, column  $4.6 \times 250$  mm, (Daicel Chemical Ind., Ltd.)). Mass spectra were recorded by ESI, and HRMS was measured on a HP-5989 instrument. The employed solvents were dry up by standard methods when necessary. Commercially obtained reagents were used without further purification.

## 2 Preparation of the starting materials

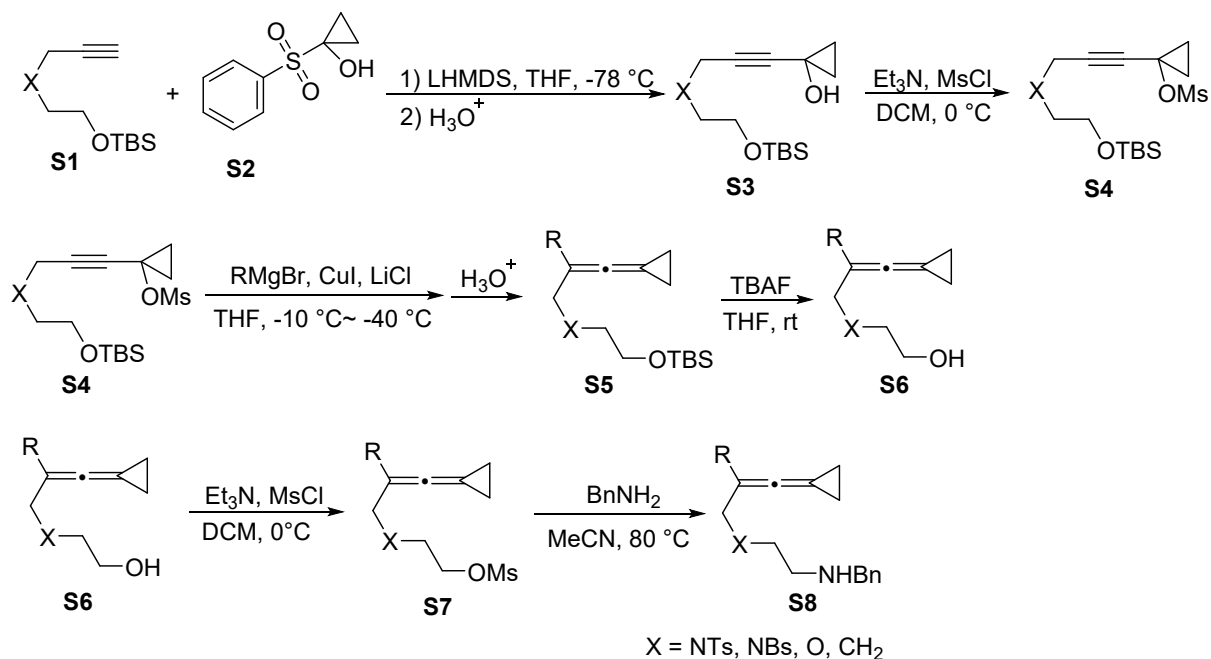

The procedure of preparing compounds **S6** was slightly modified according to the previous literature.<sup>1</sup> To the solution of compounds **S1** (20 mmol) in THF (30 mL) was added LHMDS (22 mmol, 1.0 M in THF) within 20 min at -78 °C under argon. The resulting solution was allowed to stir at -78 °C for 0.5 h before a solution of **S2** (10 mmol) in THF (10 mL) was added into the above mixture. Consequently, the reaction mixture was allowed to warm up to room temperature and was stirred for 8 h. Then, saturated NH<sub>4</sub>Cl solution was added to quench the reaction. Extracted with ethyl ether, dried over anhydrous Na<sub>2</sub>SO<sub>4</sub>, and filtered, the organic phase was purified by a flash column chromatography on silica gel to give the corresponding products **S3** (PE/EA: 4:1~2:1).

Under argon atmosphere, compound **S3** (4.0 mmol) was dissolved in DCM (10.0 mL) at 0 °C, Et<sub>3</sub>N (8.0 mmol) and MsCl (6.0 mmol) was added. After stirring for 1.0 h, the reaction was quenched with H<sub>2</sub>O (10.0 mL), extracted with DCM (10 mL x 3), and dried over anhydrous Na<sub>2</sub>SO<sub>4</sub>. The solvent was removed under reduced pressure and the residue was purified by a flash column chromatography (SiO<sub>2</sub>) to give the corresponding product **S4** (PE/EA: 4:1).

Under argon atmosphere, CuI (2.2 mmol) and LiCl (2.2 mmol) in a three-necked bottle was dried upon heating. Then THF (10 mL) was added. At -5 °C, RMgBr (1.0 mol/L in THF, 2.0 mmol, 2.0 mL) was added to the reaction mixture. 10 minutes later, the flask was moved into a -40 °C bath and the reaction mixture was stirred for a while before a solution of **S4** (1.0 mmol) in THF (10 mL) was added dropwise into the above flask. After stirring at -40 °C for 8.0 h, the reaction was quenched with saturated NH<sub>4</sub>Cl solution, extracted with EA (10 mL x 3), and dried over anhydrous

Na<sub>2</sub>SO<sub>4</sub>. The solvent was removed under reduced pressure and the residue was purified by a flash column chromatography (SiO<sub>2</sub>) to give the corresponding product **S5** (PE/EA: 10:1). In a flame dried 20 mL vial, compound **S5** (2 mmol, 1.0 eq.) was combined with anhydrous THF (10 mL) under argon, and then TBAF (1.0 M solution in THF, 3.0 mL, 3.0 mmol, 1.5 eq.) was added all at once. The reaction solution was left to stir at 0 °C for 1.0 h, and then was concentrated under reduced pressure and purified directly by a flash chromatography (SiO<sub>2</sub>) to give product **S6** (PE/EA: 2:1).

Under argon atmosphere, compound **S6** (2.0 mmol) was dissolved in DCM (10.0 mL) at 0 °C, Et<sub>3</sub>N (4.0 mmol) and MsCl (3.0 mmol) was added. After stirring for 1.0 h, the reaction was quenched with H<sub>2</sub>O (5.0 mL), extracted with DCM (5 mL x 3), and dried over anhydrous Na<sub>2</sub>SO<sub>4</sub>. The solvent was removed under reduced pressure and the residue was purified by a flash column chromatography (SiO<sub>2</sub>) to give the corresponding product **S7** (PE/EA: 2:1).

To the solution of **S7** (1.5 mmol) in acetonitrile (10 ml) was added BnNH<sub>2</sub> (1.8 mmol). The resulting solution was warmed to 70 °C and stirred for 8 h. The solvent was removed under reduced pressure and the residue was purified by a flash column chromatography (SiO<sub>2</sub>) to give the corresponding product **S8** (PE/EA: 1:1).

### 3 General procedure for the synthesis of compounds **2** and **2'**

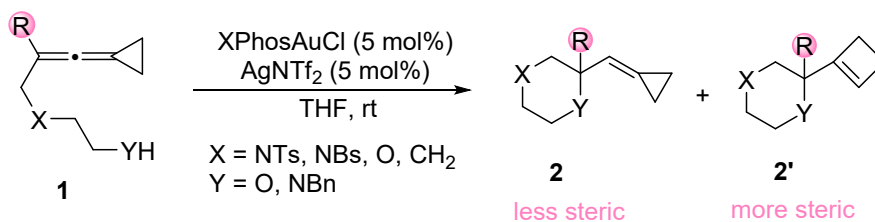

To a mixture of **1** (0.2 mmol), XPhosAuCl (7.1 mg, 5 mol%) and AgNTf<sub>2</sub> (3.9 mg, 5 mol%) was added THF (4.0 mL). The reaction mixture was stirred at room temperature until the substrates were completely consumed under ambient atmosphere. The solvent was evaporated and the residue was purified by a silica gel chromatography (PE/EA = 10/1) to furnish the desired product.

### 4 Experimental procedures for the transformations of the cyclization products **2a** and **2q'**

Experimental procedure for the synthesis of compound **3**

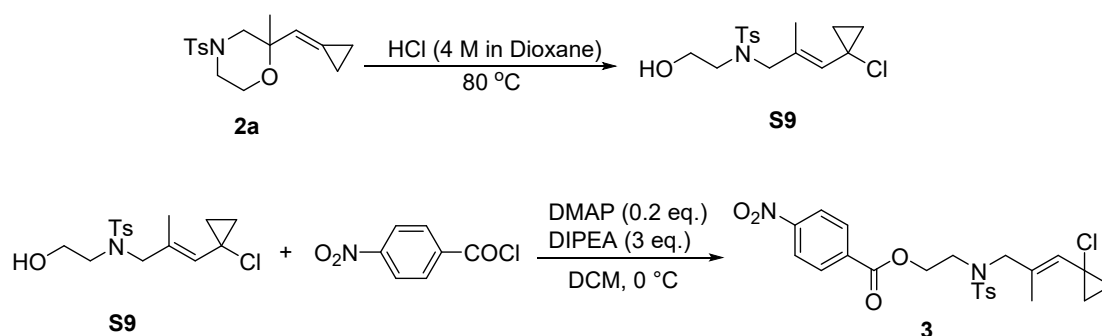

In a 10 mL vial, compound **2a** (61.4 mg, 0.2 mmol) was combined with 4.0 M HCl in Dioxane (0.2 mL). After stirring for 1.0 h, the reaction mixture was diluted with EtOAc (1.0 mL) and water (0.5 mL). The organic phase was collected, and the aqueous phase was washed with more EtOAc (2 x 1 mL). The combined organic phases were dried over sodium sulfate, concentrated under reduced pressure, and the residue was purified by a flash column chromatography (SiO<sub>2</sub>, PE/EA: 2:1) to give the corresponding product **S9** (61.8 mg, 90%).

In a flame dried 2-dram vial, compound **S9** (61.8 mg, 0.18 mmol, 1.0 eq.) was combined with anhydrous DCM (1.0 mL), DMAP (13.5 mg, 0.036 mmol, 0.2 eq.) and DIPEA (0.32 mL, 0.54 mmol, 3.0 eq.) under an argon atmosphere. The reaction solution was cooled to 0 °C, and then a solution of *para*-nitrobenzoyl chloride (82.8 mg, 0.45 mmol, 2.5 eq.) in DCM (1.0 mL) was added slowly over a 5-min period (the reaction solution turned to yellow color). The resulting solution was left to stir at 0 °C for another 15 min, and then was warmed to room temperature for 45 min. The reaction was then quenched with water (1.0 mL), diluted with EtOAc (2.0 mL), and washed with

water (1.0 mL) and brine (1.0 mL). The organic phase was collected, dried over sodium sulfate, filtered and concentrated under reduced pressure to give a yellow oil, which was purified by a flash chromatography (PE/EA: 4:1) to give compound **3** (77.0 mg, 87%) as a colorless solid.

Experimental procedure for the synthesis of compound **4**

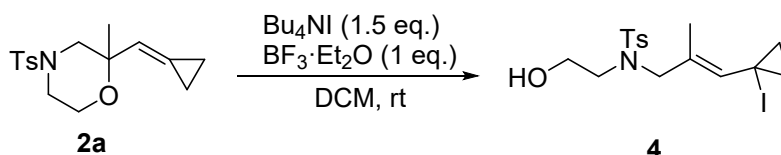

In a 10 mL vial, compound **2a** (30.7 mg, 0.1 mmol, 1.0 eq.) was combined with DCM (1.0 mL),  $\text{Bu}_4\text{NI}$  (55.4 mg, 0.15 mmol, 1.5 eq.) and  $\text{BF}_3 \cdot \text{Et}_2\text{O}$  (1.0 eq.). After stirring at room temperature for 6.0 h, the reaction mixture was concentrated under reduced pressure, and diluted with water (1.0 mL) and EtOAc (2.0 mL). The organic phase was collected, and then the aqueous phase was washed with more EtOAc (2 x 2 mL). The combined organic phases were dried over sodium sulfate, concentrated under reduced pressure, and the residue was purified by a flash column chromatography ( $\text{SiO}_2$ , PE/EA: 2:1) to give the corresponding product **4** (29.1 mg, 67%).

Experimental procedure for the synthesis of compound **5**

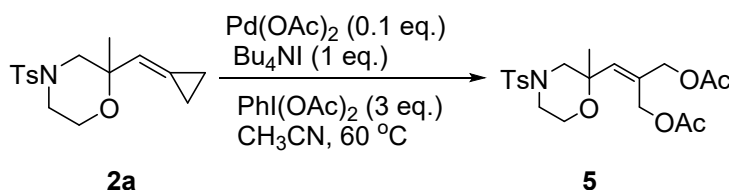

The procedure of preparing compound **5** was slightly modified according to the previous literature.<sup>2</sup> Under ambient atmosphere, compound **2a** (0.1 mmol),  $\text{PhI}(\text{OAc})_2$  (0.3 mmol),  $\text{Pd}(\text{OAc})_2$  (0.01 mmol),  $\text{Bu}_4\text{NI}$  (0.1 mmol), and  $\text{CH}_3\text{CN}$  (1.0 mL) were added into an Schlenk tube. The reaction mixture was stirred at 60 °C until the reaction was complete. Then, the solvent was removed under reduced pressure and the residue was purified by a flash column chromatography ( $\text{SiO}_2$ , PE/EA: 2:1) to give the product **5** (17.5 mg, 42%) as a colorless oil.

Experimental procedure for the synthesis of compound **6**

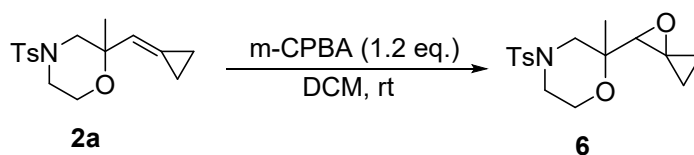

In a 10 mL vial, compound **2a** (30.7 mg, 0.1 mmol, 1.0 eq.) was combined with DCM (1.0 mL) and m-CPBA (0.12 mmol, 1.2 eq.). After stirring at room temperature for 12 h, the reaction mixture was

concentrated under reduced pressure, and diluted with water (1.0 mL) and EtOAc (2.0 mL). The organic phase was collected, and then the aqueous phase was washed with more EtOAc (2 x 2 mL). The combined organic phases were dried over sodium sulfate, concentrated under reduced pressure, and the residue was purified by a flash column chromatography (SiO<sub>2</sub>, PE/EA: 10:1) to give the corresponding product **6** (20.9 mg, 68%).

Experimental procedure for the synthesis of compound **7**

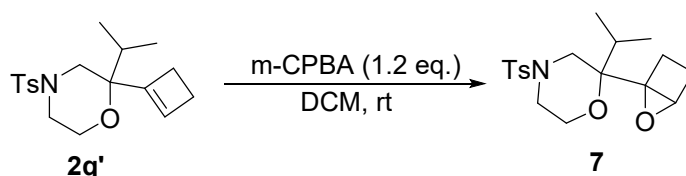

In a 10 ml vial, compound **2q'** (33.5 mg, 0.1 mmol, 1.0 eq.) was combined with DCM (1.0 mL) and m-CPBA (0.12 mmol, 1.2 eq.). After stirring at room temperature for 1.0 h, the reaction mixture was concentrated under reduced pressure, and diluted with water (1.0 mL) and EtOAc (2.0 mL). The organic phase was collected, and then the aqueous phase was washed with more EtOAc (2 x 2 mL). The combined organic phases were dried over sodium sulfate, concentrated under reduced pressure, and the residue was purified by a flash column chromatography (SiO<sub>2</sub>, PE/EA: 10:1) to give the corresponding product **7** (33.0 mg, 94%).

## 5 Control experiments

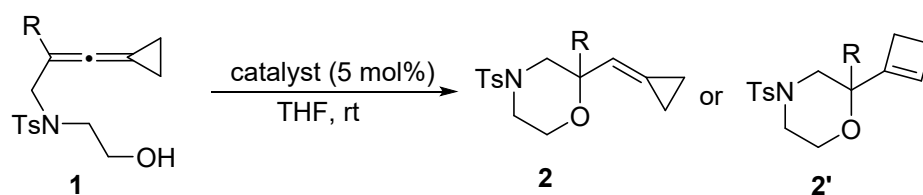

| substrate | catalyst (5 mol%)  | yield/% |
|-----------|--------------------|---------|
| <b>1a</b> | XPhosAuCl          | NR      |
| <b>1a</b> | AgNTf <sub>2</sub> | NR      |
| <b>1a</b> | HNTf <sub>2</sub>  | NR      |
| <b>1q</b> | XPhosAuCl          | NR      |
| <b>1q</b> | AgNTf <sub>2</sub> | NR      |
| <b>1q</b> | HNTf <sub>2</sub>  | NR      |

All reactions were carried out using **1a** or **1q** (0.2 mmol), catalyst (5 mol%) in THF (4.0 mL) at room temperature.

## 6 Asymmetric studies

Using **1a** as substrate to screen the reaction conditions:

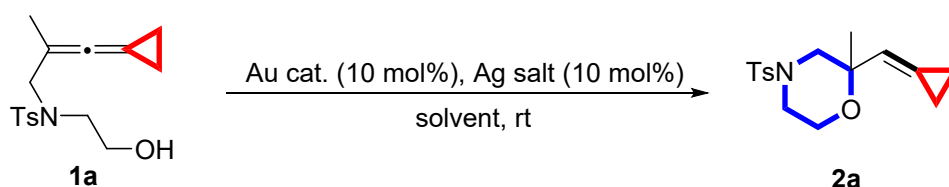

| entry <sup>a</sup> | Au cat.                                                       | Ag salt (mol%)          | solvent | yield (%) <sup>b</sup> | ee (%) |
|--------------------|---------------------------------------------------------------|-------------------------|---------|------------------------|--------|
| 1                  | ( <i>R</i> )-xyl-PHANEPPhos(AuSbF <sub>6</sub> ) <sub>2</sub> | -                       | THF     | 49                     | 4      |
| 2                  | ( <i>R</i> )-Xyl-BINAP(AuCl) <sub>2</sub>                     | AgNTf <sub>2</sub> , 10 | THF     | 76                     | -      |
| 3                  | ( <i>R</i> )-DTBM-SegPhos(AuCl) <sub>2</sub>                  | AgNTf <sub>2</sub> , 10 | THF     | 62                     | 26     |
| 4                  | ( <i>R</i> )-DTBM-SegPhos(AuCl) <sub>2</sub>                  | AgNTf <sub>2</sub> , 10 | Toluene | 87                     | 21     |
| 5                  | ( <i>R</i> )-DTBM-SegPhos(AuCl) <sub>2</sub>                  | AgNTf <sub>2</sub> , 10 | DCM     | 78                     | 55     |
| 6                  | ( <i>R</i> )-DTBM-SegPhos(AuCl) <sub>2</sub>                  | AgNTf <sub>2</sub> , 10 | DCE     | 49                     | 49     |
| 7                  | ( <i>R</i> )-DTBM-SegPhos(AuCl) <sub>2</sub>                  | AgOTs, 10               | DCM     | 90                     | 10     |
| 8                  | ( <i>R</i> )-DTBM-SegPhos(AuCl) <sub>2</sub>                  | AgSbF <sub>6</sub> , 10 | DCM     | 61                     | 52     |
| 9 <sup>c</sup>     | ( <i>R</i> )-DTBM-SegPhos(AuCl) <sub>2</sub>                  | AgNTf <sub>2</sub> , 5  | DCM     | 65                     | 40     |
| 10 <sup>c</sup>    | ( <i>R</i> )-DTBM-SegPhos(AuCl) <sub>2</sub>                  | AgNTf <sub>2</sub> , 10 | DCM     | 70                     | 49     |

<sup>a</sup> All reactions were carried out using **1a** (0.1 mmol), Au cat. (5 mol%). <sup>b</sup> Isolated yields. <sup>c</sup> Temperature: -5 °C



Using **1q** as substrate to screen the reaction conditions:

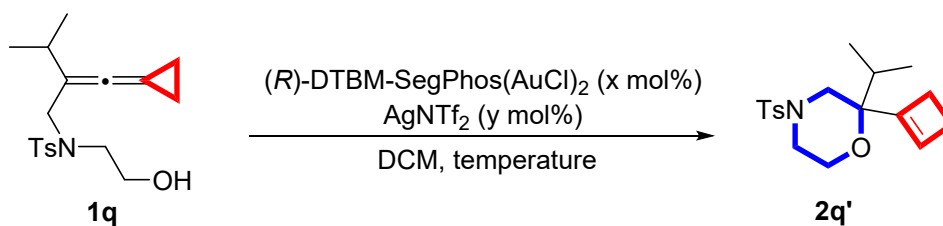

| entry <sup>a</sup> | Au cat. ( $x$ mol%)                   | Ag salt ( $y$ mol%)   | temperature | yield (%) <sup>b</sup> | ee (%) |
|--------------------|---------------------------------------|-----------------------|-------------|------------------------|--------|
| 1                  | $(R)\text{-DTBM-SegPhos(AuCl)}_2$ , 5 | $\text{AgNTf}_2$ , 10 | rt          | 84                     | 55     |
| 2                  | $(R)\text{-DTBM-SegPhos(AuCl)}_2$ , 5 | $\text{AgNTf}_2$ , 5  | - 5 °C      | 88                     | 72     |

<sup>a</sup> All reactions were carried out using **1q** (0.1 mmol), Au cat. (5 mol%). <sup>b</sup> Isolated yields.

Chiral Ligands:

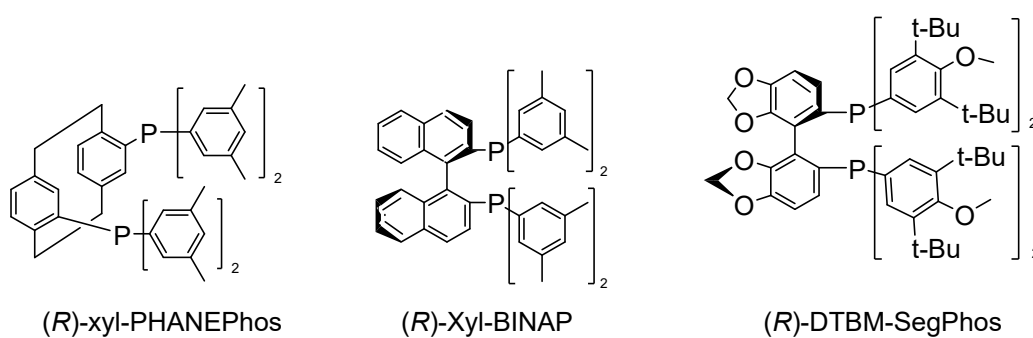

## 7 Spectroscopic data

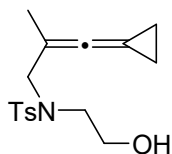

**Compound 1a:** Yield: 589.4 mg, 96%; A colorless solid; Mp: 63 – 65 °C; Eluent: PE/EA = 2/1; <sup>1</sup>H NMR (400 MHz, CDCl<sub>3</sub>, TMS) δ 7.71 (d, *J* = 8.0 Hz, 2H), 7.31 (d, *J* = 8.0 Hz, 2H), 3.82 (s, 2H), 3.76 – 3.72 (m, 2H), 3.26 (t, *J* = 5.6 Hz, 2H), 2.46 – 2.42 (m, 4H), 1.75 (s, 3H), 1.50 - 1.34 (m, 4H); <sup>13</sup>C NMR (100 MHz, CDCl<sub>3</sub>, TMS) δ 188.3, 143.4, 136.0, 129.7, 127.2, 97.9, 78.2, 60.9, 53.8, 50.4, 21.5, 17.0, 7.1; IR (neat): ν 3520, 2990, 2912, 2023, 1600, 1328, 1154, 1098, 909, 813, 729 cm<sup>-1</sup>; HRMS (ESI-TOF) Calcd for C<sub>16</sub>H<sub>21</sub>NO<sub>3</sub>NaS [M+Na]<sup>+</sup>: 330.11344, found: 330.11427.

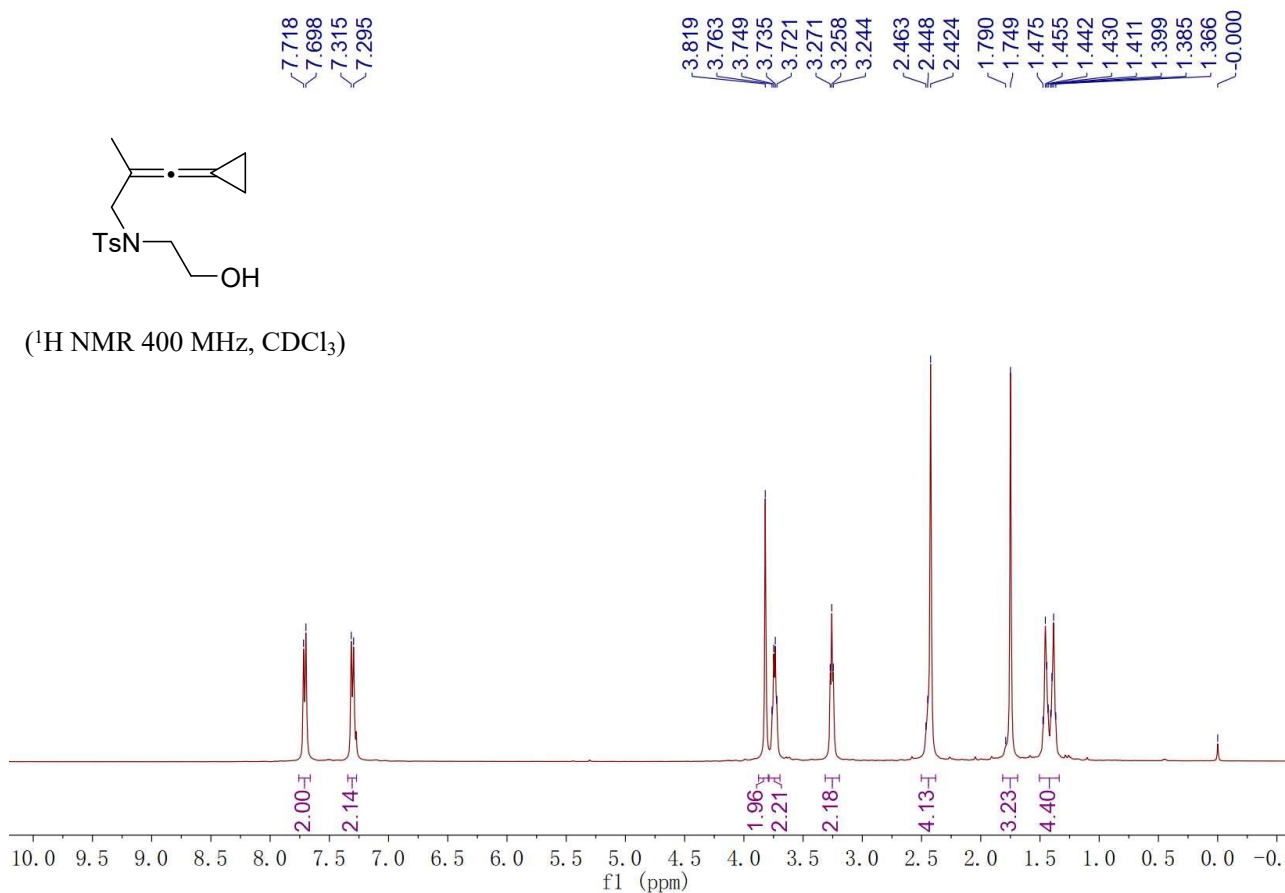

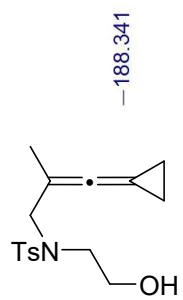

(<sup>13</sup>C NMR 100 MHz, CDCl<sub>3</sub>)

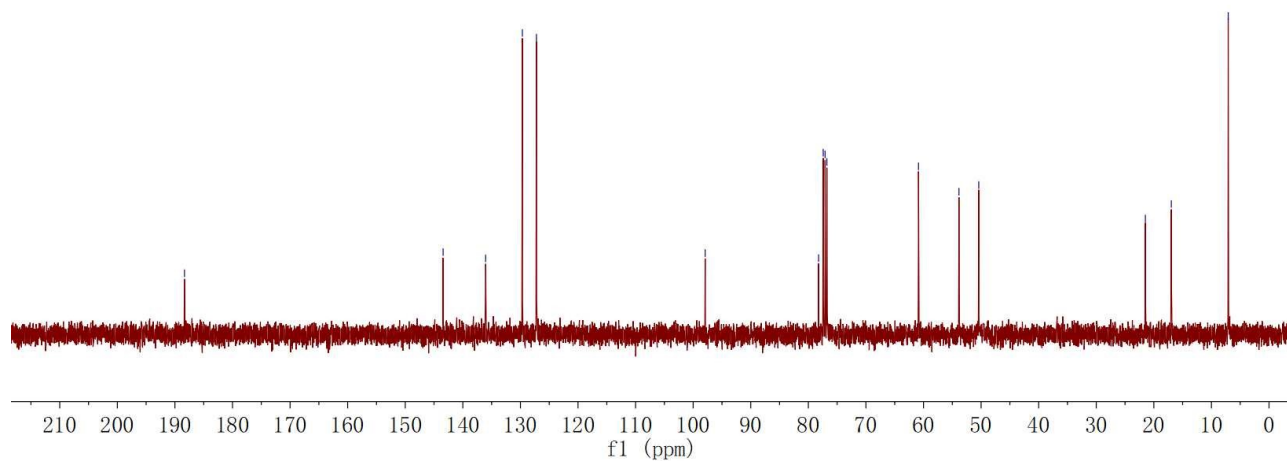

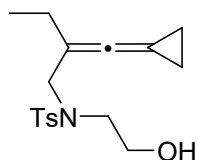

**Compound 1b:** Yield: 597.1 mg, 93%; A colorless solid; Mp: 62 – 64 °C; Eluent: PE/EA = 2/1;  $^1\text{H}$  NMR (400 MHz,  $\text{CDCl}_3$ , TMS)  $\delta$  7.71 (d,  $J = 8.0$  Hz, 2H), 7.31 (d,  $J = 8.0$  Hz, 2H), 3.84 (s, 2H), 3.75 – 3.71 (m, 2H), 3.25 (t,  $J = 5.5$  Hz, 2H), 2.43 (s, 3H), 2.39 (t,  $J = 6.0$  Hz, 1H), 2.06 (q,  $J = 7.4$  Hz, 2H), 1.52 – 1.42 (m, 2H), 1.45 – 1.35 (m, 2H), 1.00 (t,  $J = 7.4$  Hz, 3H);  $^{13}\text{C}$  NMR (100 MHz,  $\text{CDCl}_3$ , TMS)  $\delta$  187.8, 143.5, 136.1, 129.7, 127.3, 104.8, 80.0, 61.1, 52.9, 50.7, 23.5, 21.5, 12.1, 7.3; IR (neat):  $\nu$  3276, 2959, 2913, 2849, 2023, 1527, 1454, 1355, 1086, 966, 809, 753  $\text{cm}^{-1}$ ; HRMS (ESI-TOF) Calcd for  $\text{C}_{17}\text{H}_{23}\text{NO}_3\text{NaS}$   $[\text{M}+\text{Na}]^+$ : 344.12909, found:344.12927.

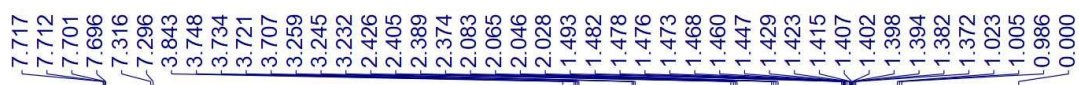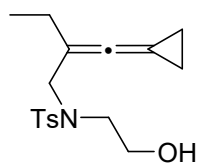

( $^1\text{H}$  NMR 400 MHz,  $\text{CDCl}_3$ )

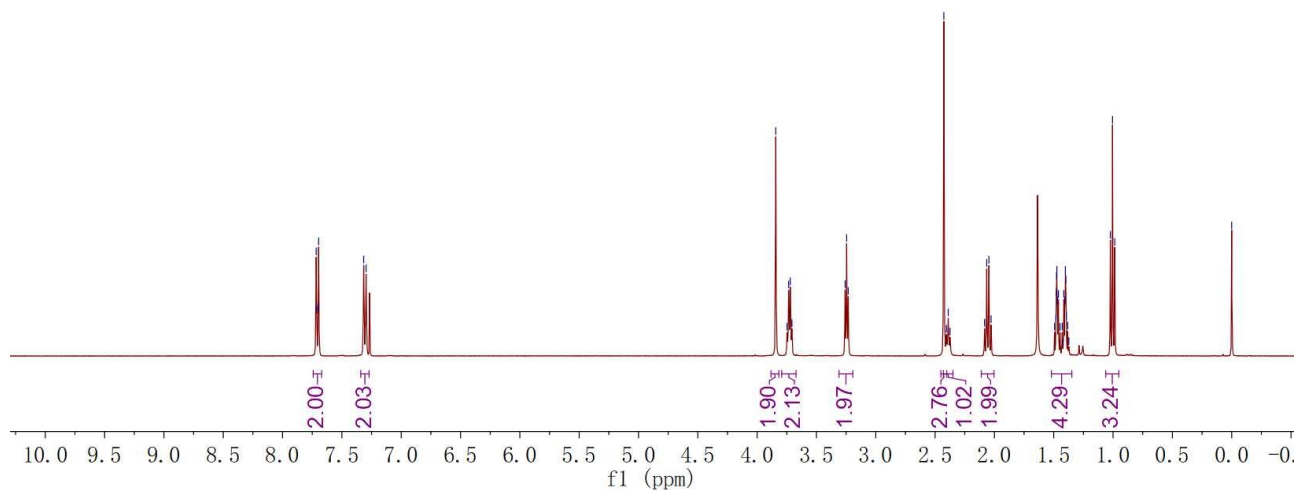

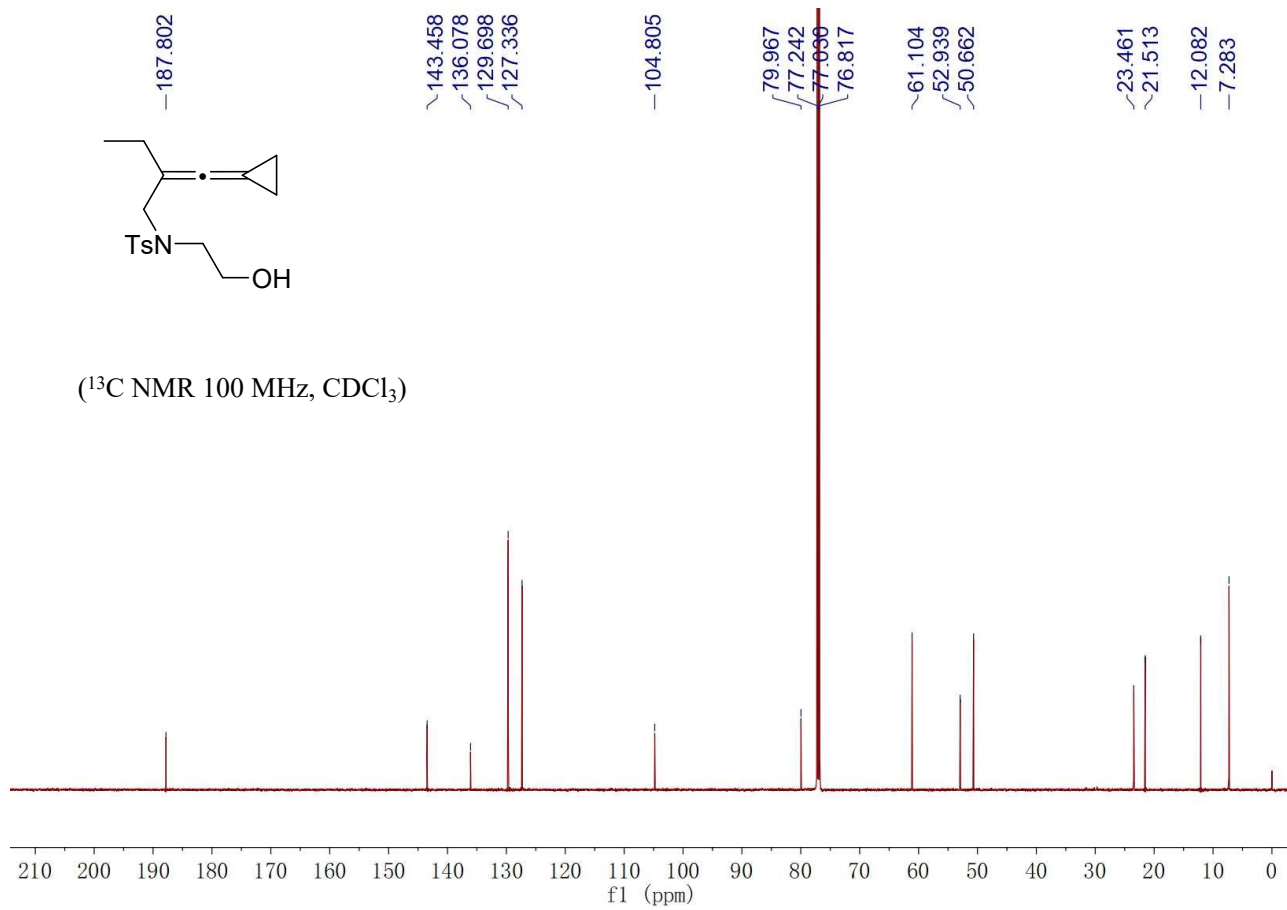

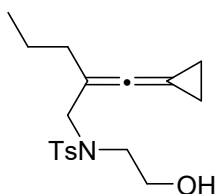

**Compound 1c:** Yield: 616.4 mg, 92%; A colorless solid; Mp: 59 – 61 °C; Eluent: PE/EA = 2/1;  $^1\text{H}$  NMR (400 MHz,  $\text{CDCl}_3$ , TMS)  $\delta$  7.70 (d,  $J = 8.0$  Hz, 2H), 7.30 (d,  $J = 8.0$  Hz, 2H), 3.83 (s, 2H), 3.75 – 3.71 (m, 2H), 3.25 (t,  $J = 5.2$  Hz, 2H), 2.42 – 2.40 (m, 4H), 1.99 (t,  $J = 7.5$  Hz, 2H), 1.36 – 1.49 (m, 6H), 0.90 (t,  $J = 7.5$  Hz, 3H).  $^{13}\text{C}$  NMR (100 MHz,  $\text{CDCl}_3$ , TMS)  $\delta$  188.2, 143.4, 136.1, 129.7, 127.3, 102.8, 79.4, 61.0, 52.9, 50.6, 32.3, 21.5, 20.8, 13.8, 7.2; IR (neat):  $\nu$  3259, 2926, 2904, 2024, 1446, 1335, 1281, 1017, 989, 806, 829, 661  $\text{cm}^{-1}$ ; HRMS (ESI-TOF) Calcd for  $\text{C}_{18}\text{H}_{25}\text{NO}_3\text{NaS}$   $[\text{M}+\text{Na}]^+$ : 358.14474, found: 358.14484.

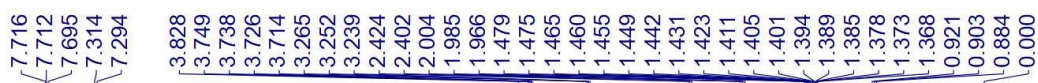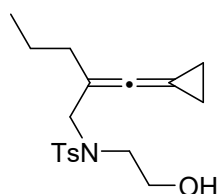

( $^1\text{H}$  NMR 400 MHz,  $\text{CDCl}_3$ )

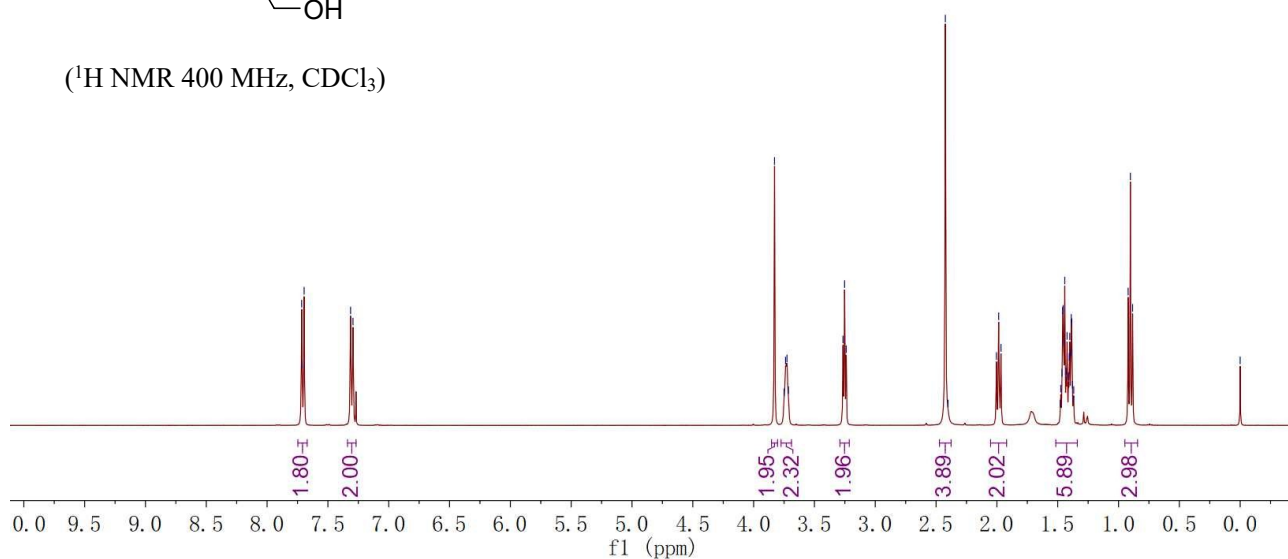

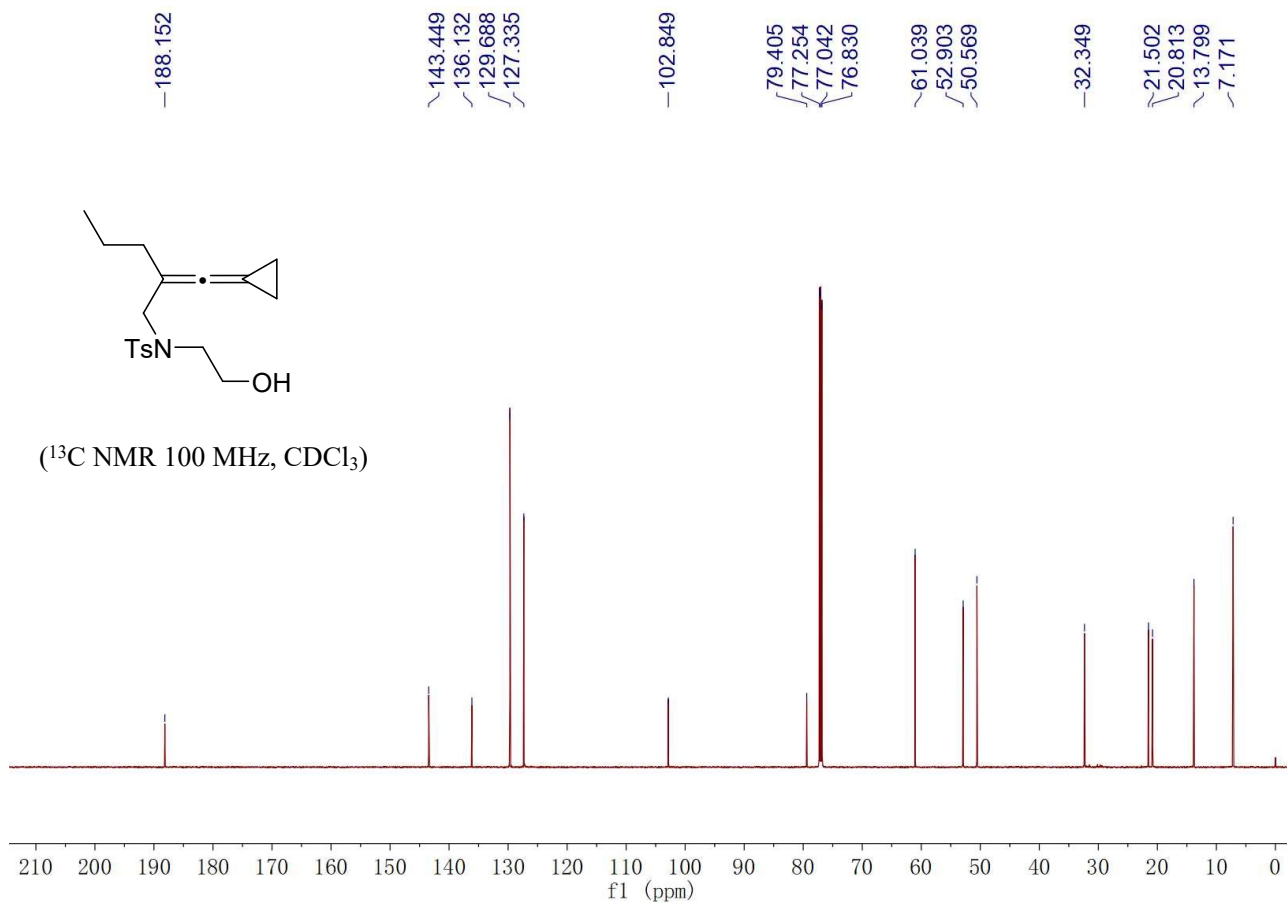

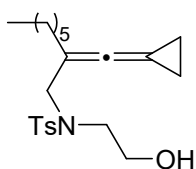

**Compound 1d:** Yield: 708.8 mg, 94%; A yellow oil; Eluent: PE/EA = 2/1;  $^1\text{H}$  NMR (400 MHz,  $\text{CDCl}_3$ , TMS)  $\delta$  7.73 – 7.68 (m, 2H), 7.30 (d,  $J$  = 8.0 Hz, 2H), 3.83 (s, 2H), 3.75 – 3.71 (m, 2H), 3.25 (t,  $J$  = 5.4 Hz, 2H), 2.47 – 2.42 (m, 4H), 1.98 (t,  $J$  = 7.5 Hz, 2H), 1.50 – 1.34 (m, 6H), 1.33 – 1.19 (m, 6H), 0.88 (t,  $J$  = 6.8 Hz, 3H);  $^{13}\text{C}$  NMR (100 MHz,  $\text{CDCl}_3$ , TMS)  $\delta$  188.1, 143.4, 136.2, 129.7, 127.3, 103.1, 79.4, 61.0, 52.9, 50.5, 31.7, 30.3, 29.0, 27.5, 25.7, 22.6, 21.5, 14.1, 7.2; IR (neat):  $\nu$  3531, 2925, 2855, 2023, 1602, 1448, 1331, 1044, 988, 813, 730  $\text{cm}^{-1}$ ; HRMS (ESI-TOF) Calcd for  $\text{C}_{21}\text{H}_{31}\text{NO}_3\text{NaS}$   $[\text{M}+\text{Na}]^+$ : 400.19169, found: 400.19187.

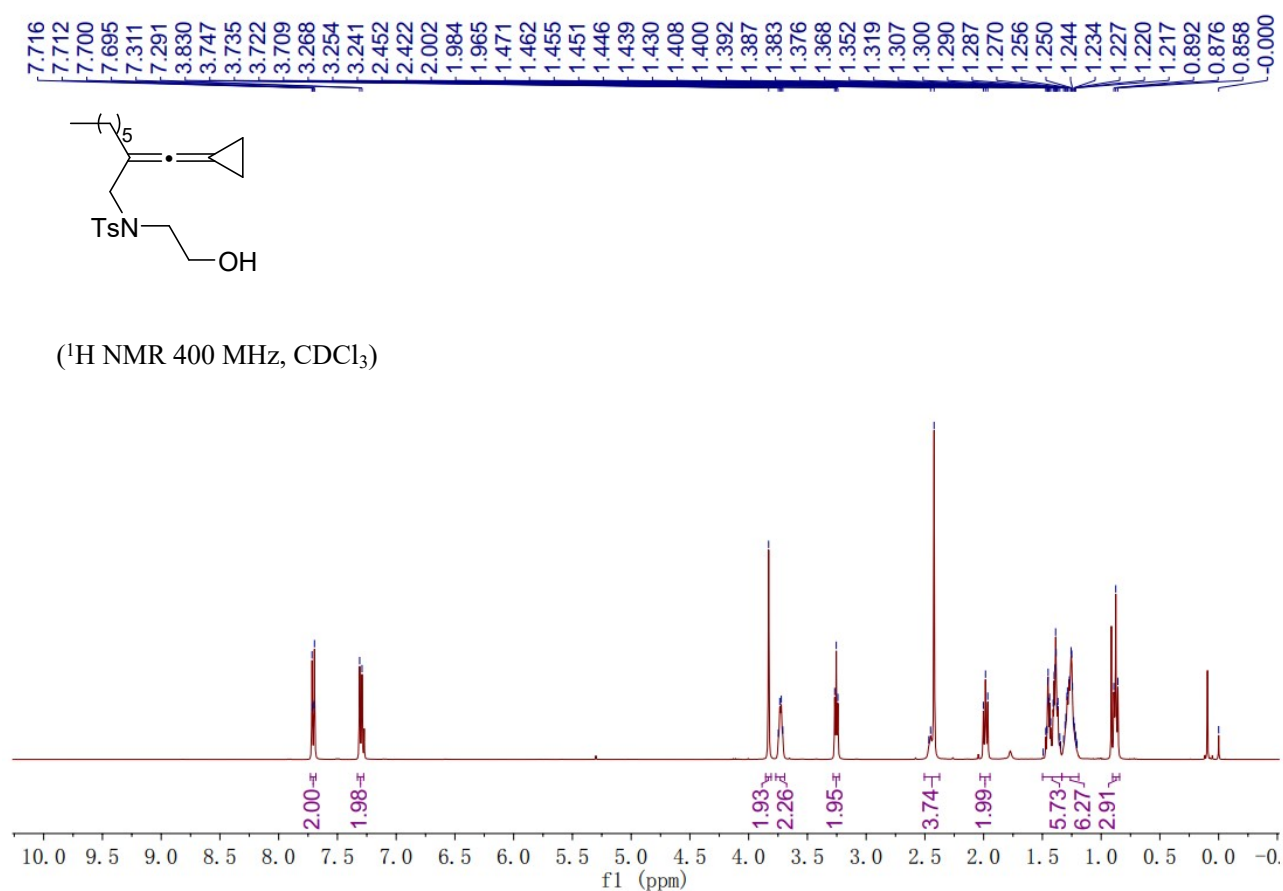



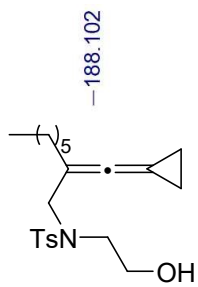

— 188.102

~ 143.427  
 ~ 136.196  
 ~ 129.684  
 ~ 127.341

— 103.063

~ 79.430  
 ~ 77.277  
 ~ 77.061  
 ~ 76.849

~ 61.017  
 ~ 52.855  
 ~ 50.492

~ 31.703  
 ~ 30.250  
 ~ 28.954  
 ~ 27.502  
 ~ 25.663  
 ~ 22.639  
 ~ 21.498  
 ~ 14.088  
 ~ 7.186

(<sup>13</sup>C NMR 100 MHz, CDCl<sub>3</sub>)

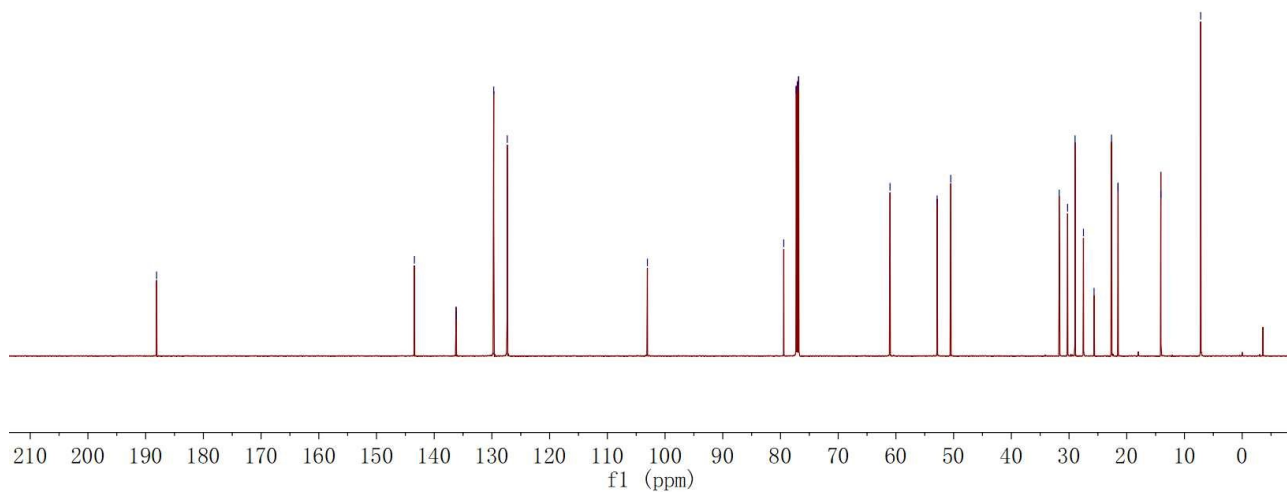

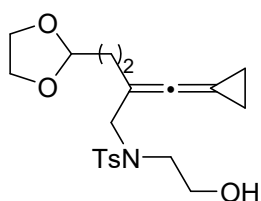

**Compound 1e:** Yield: 746.7 mg, 95%; A colorless solid; Mp: 80 – 84 °C; Eluent: PE/EA = 2/1;  $^1\text{H}$  NMR (400 MHz,  $\text{CDCl}_3$ , TMS)  $\delta$  7.75 – 7.67 (m, 2H), 7.30 (d,  $J = 8.0$  Hz, 2H), 4.88 (t,  $J = 4.7$  Hz, 1H), 4.00 – 3.89 (m, 2H), 3.91 – 3.80 (m, 4H), 3.76 – 3.71 (m, 2H), 3.24 (t,  $J = 5.2$  Hz, 2H), 2.44 – 2.40 (m, 4H), 2.21 – 2.11 (m, 2H), 1.85 – 1.73 (m, 2H), 1.52 – 1.35 (m, 4H);  $^{13}\text{C}$  NMR (100 MHz,  $\text{CDCl}_3$ , TMS)  $\delta$  187.7, 143.4, 136.1, 129.7, 127.4, 103.9, 102.6, 80.5, 64.9, 61.0, 53.0, 50.9, 31.8, 24.6, 21.5, 7.3; IR (neat):  $\nu$  3512, 2961, 2024, 1445, 1331, 1088, 1261, 1042, 990, 836, 892, 730  $\text{cm}^{-1}$ ; HRMS (ESI-TOF) Calcd for  $\text{C}_{20}\text{H}_{27}\text{NO}_5\text{NaS}$   $[\text{M}+\text{Na}]^+$ : 416.15021, found: 416.14994.

7.715  
7.698  
7.694  
7.311  
7.291  
4.894  
4.882  
4.870  
3.966  
3.962  
3.957  
3.953  
3.945  
3.864  
3.856  
3.851  
3.847  
3.840  
3.829  
3.755  
3.741  
3.727  
3.713  
3.257  
3.244  
3.231  
2.437  
2.423  
2.407  
2.177  
2.158  
2.138  
1.803  
1.791  
1.782  
1.774  
1.770  
1.763  
1.751  
1.619  
1.464  
1.460  
1.455  
1.448  
1.441  
1.419  
1.412  
1.404  
1.399  
1.395  
0.000

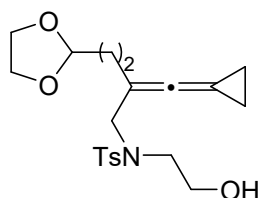

( $^1\text{H}$  NMR 400 MHz,  $\text{CDCl}_3$ )

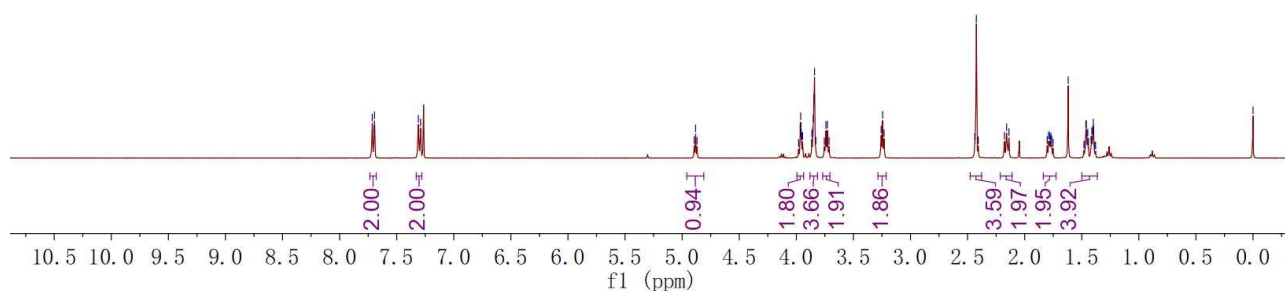

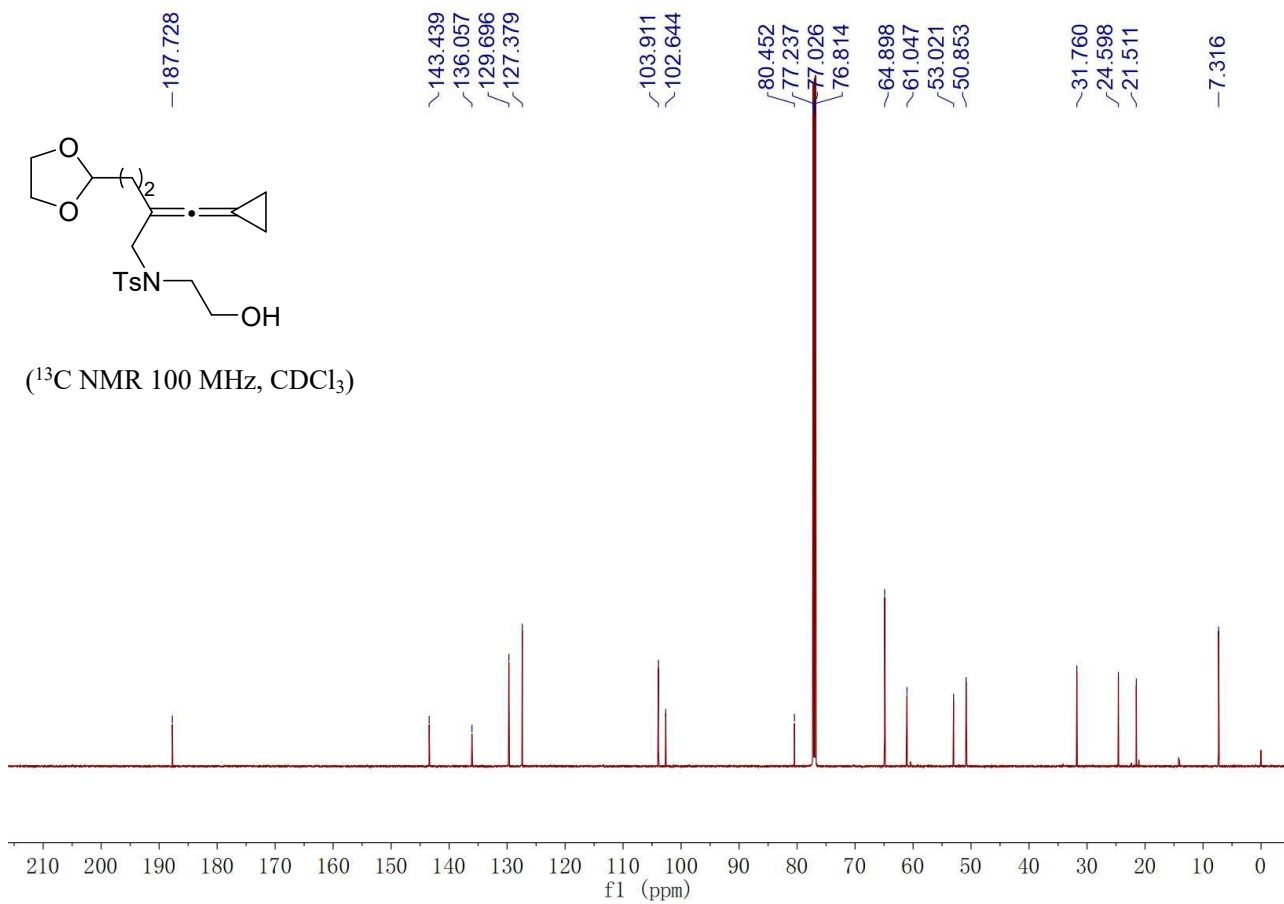

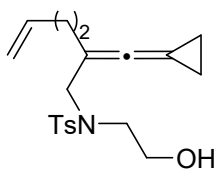

**Compound 1f:** Yield: 652.4 mg, 94%; A yellow oil; Eluent: PE/EA = 2/1;  $^1\text{H}$  NMR (400 MHz,  $\text{CDCl}_3$ , TMS)  $\delta$  7.73 – 7.68 (m, 2H), 7.30 (d,  $J = 8.0$  Hz, 2H), 5.85 – 5.75 (m, 1H), 5.05 – 4.91 (m, 2H), 3.84 (s, 2H), 3.75 – 3.71 (m, 2H), 3.25 (t,  $J = 5.4$  Hz, 2H), 2.45 (d,  $J = 7.0$  Hz, 1H), 2.42 (s, 3H), 2.23 – 2.07 (m, 4H), 1.50 – 1.36 (m, 4H);  $^{13}\text{C}$  NMR (100 MHz,  $\text{CDCl}_3$ , TMS)  $\delta$  188.2, 143.5, 138.1, 136.1, 129.7, 127.3, 114.9, 102.4, 79.9, 61.0, 52.9, 50.5, 31.7, 29.6, 21.5, 7.3; IR (neat):  $\nu$  3514, 2982, 2021, 1445, 1300, 1153, 1081, 1032, 919, 816, 729  $\text{cm}^{-1}$ ; HRMS (ESI-TOF) Calcd for  $\text{C}_{19}\text{H}_{25}\text{NO}_3\text{NaS}$   $[\text{M}+\text{Na}]^+$ : 370.14474, found: 370.14547.

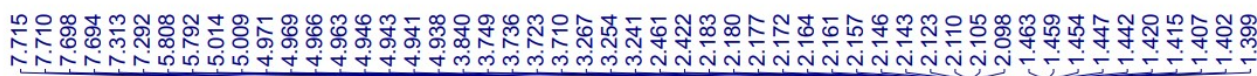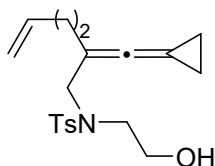

( $^1\text{H}$  NMR 400 MHz,  $\text{CDCl}_3$ )

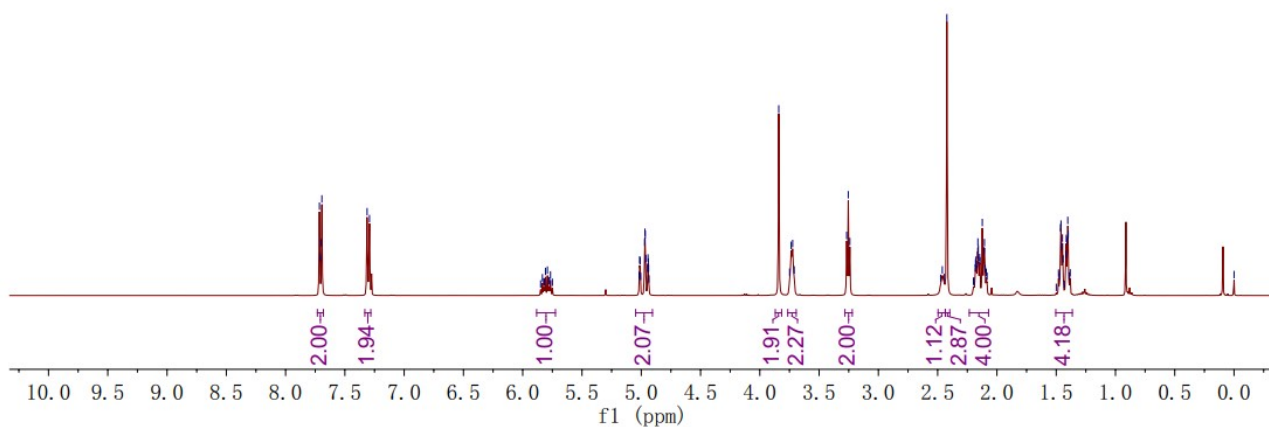

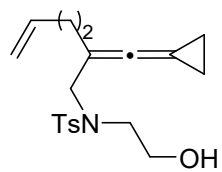

(<sup>13</sup>C NMR 100 MHz, CDCl<sub>3</sub>)

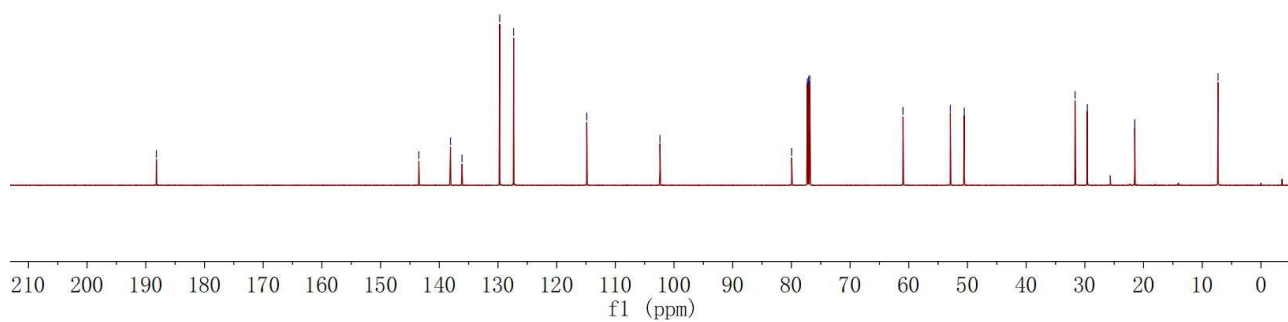

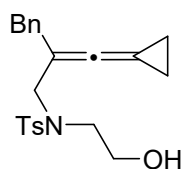

**Compound 1g:** Yield: 750.7 mg, 98%; A colorless solid; Mp: 76 – 79 °C; Eluent: PE/EA = 2/1;  $^1\text{H}$  NMR (400 MHz,  $\text{CDCl}_3$ , TMS)  $\delta$  7.66 (d,  $J = 7.8$  Hz, 2H), 7.29 – 7.18 (m, 7H), 3.78 (s, 2H), 3.61 – 3.67 (m, 2H), 3.38 (s, 2H), 3.23 (t,  $J = 5.4$  Hz, 2H), 2.41 (s, 3H), 2.35 (t,  $J = 5.6$  Hz, 1H), 1.39 (s, 4H);  $^{13}\text{C}$  NMR (100 MHz,  $\text{CDCl}_3$ , TMS)  $\delta$  189.2, 143.5, 139.1, 135.9, 129.7, 129.0, 128.2, 127.3, 126.3, 102.3, 79.6, 60.9, 52.0, 50.6, 37.3, 21.5, 7.4; IR (neat):  $\nu$  3506, 3026, 2964, 1594, 2021, 1355, 1088, 965, 836, 829, 728  $\text{cm}^{-1}$ ; HRMS (ESI-TOF) Calcd for  $\text{C}_{22}\text{H}_{25}\text{NO}_3\text{NaS}$   $[\text{M}+\text{Na}]^+$ : 406.14474, found: 406.14409.

7.674  
7.654  
7.289  
7.271  
7.257  
7.231  
7.213  
7.195  
7.177

3.783  
3.714  
3.700  
3.686  
3.672  
3.381  
3.248  
3.235  
3.221  
2.412  
2.372  
2.356  
2.340

-1.394

-0.000

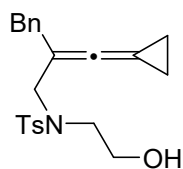

( $^1\text{H}$  NMR 400 MHz,  $\text{CDCl}_3$ )

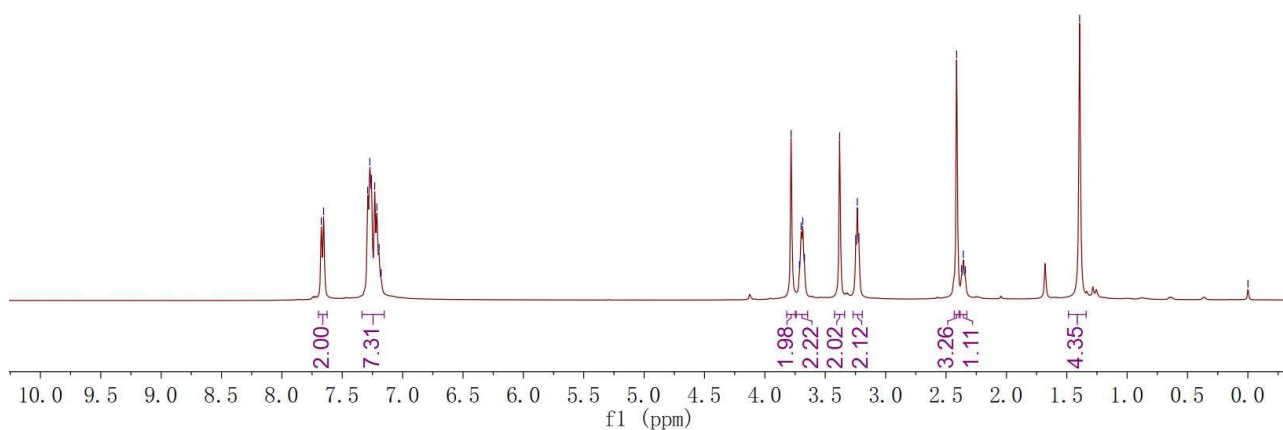

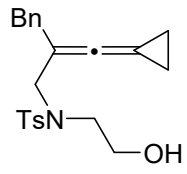

(<sup>13</sup>C NMR 100 MHz, CDCl<sub>3</sub>)

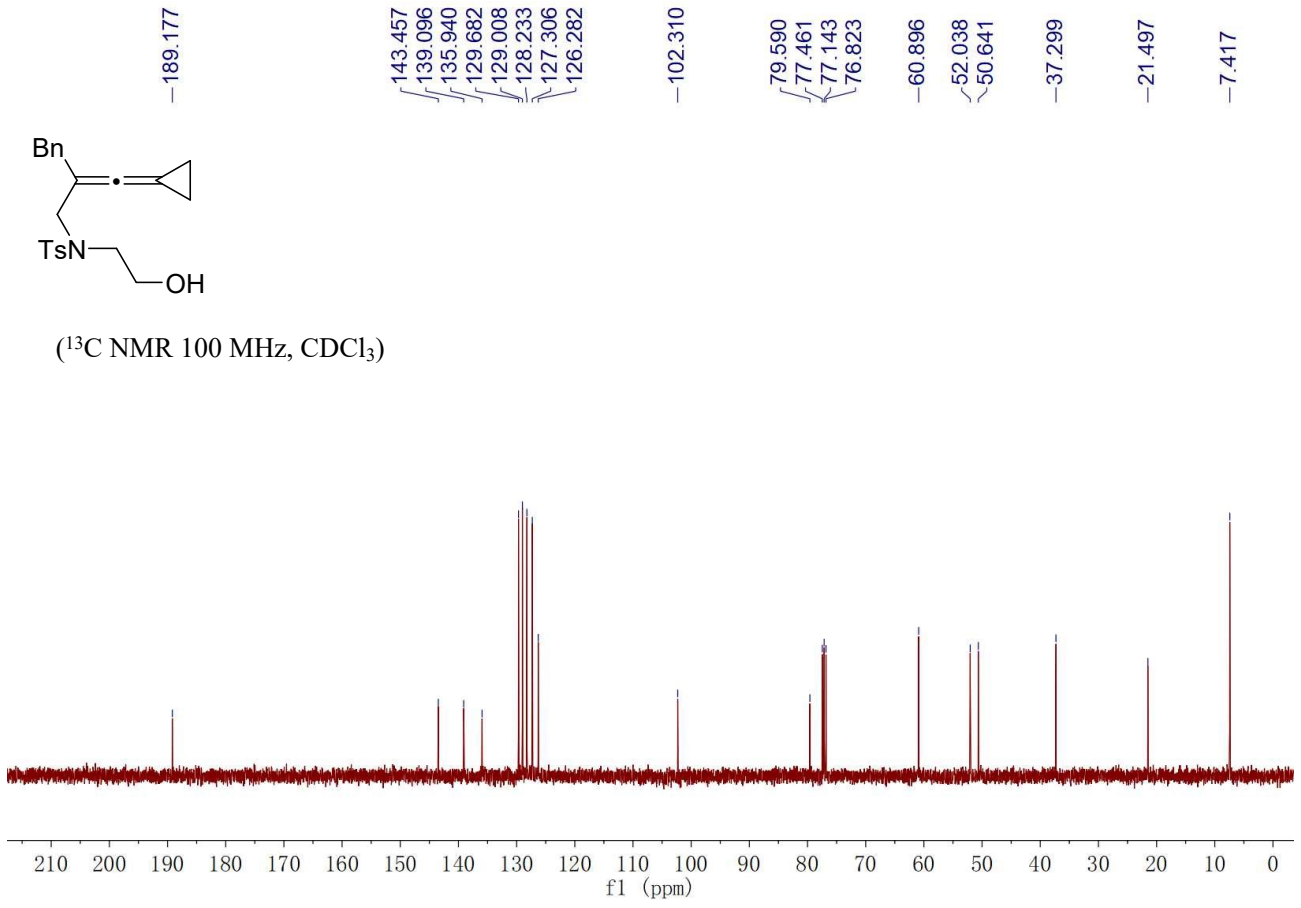

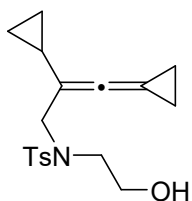

**Compound 1h:** Yield: 592.7 mg, 89%; A colorless solid; Mp: 81 – 83 °C; Eluent: PE/EA = 2/1; <sup>1</sup>H NMR (400 MHz, CDCl<sub>3</sub>, TMS) δ 7.76 – 7.67 (m, 2H), 7.30 (d, *J* = 8.0 Hz, 2H), 3.95 (s, 2H), 3.76 (t, *J* = 5.3 Hz, 2H), 3.28 (t, *J* = 5.3 Hz, 2H), 2.42 (s, 3H), 1.51 – 1.34 (m, 4H), 1.67 – 1.24 (m, 1H), 0.74 – 0.64 (m, 2H), 0.42 – 0.33 (m, 2H); <sup>13</sup>C NMR (100 MHz, CDCl<sub>3</sub>, TMS) δ 186.1, 143.4, 136.2, 129.7, 127.4, 106.5, 81.2, 61.0, 53.0, 50.6, 21.5, 10.8, 7.44, 7.36; IR (neat): ν 3514, 2973, 2892, 1442, 1342, 1163, 1083, 976, 957, 880, 829, 744 cm<sup>-1</sup>; HRMS (ESI-TOF) Calcd for C<sub>18</sub>H<sub>23</sub>NO<sub>3</sub>NaS [M+Na]<sup>+</sup>: 356.12909, found: 356.12926.

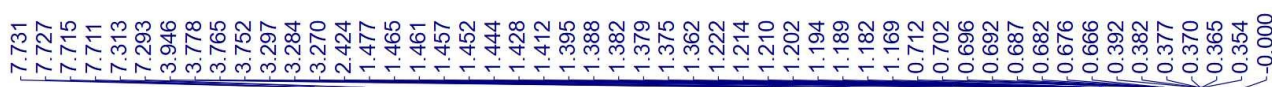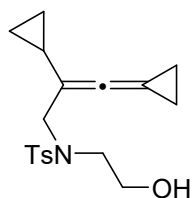

(<sup>1</sup>H NMR 400 MHz, CDCl<sub>3</sub>)

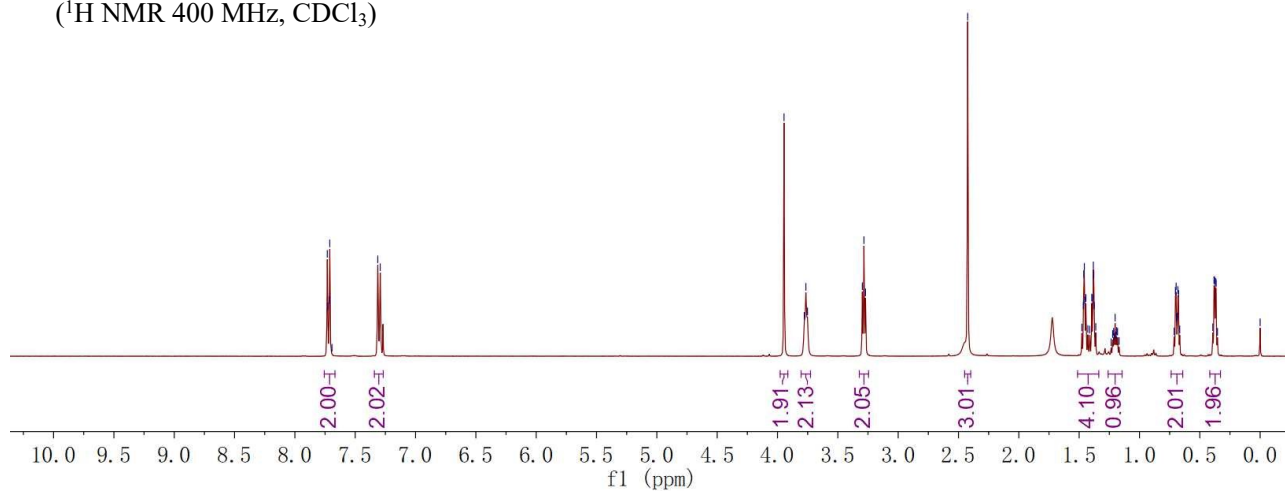



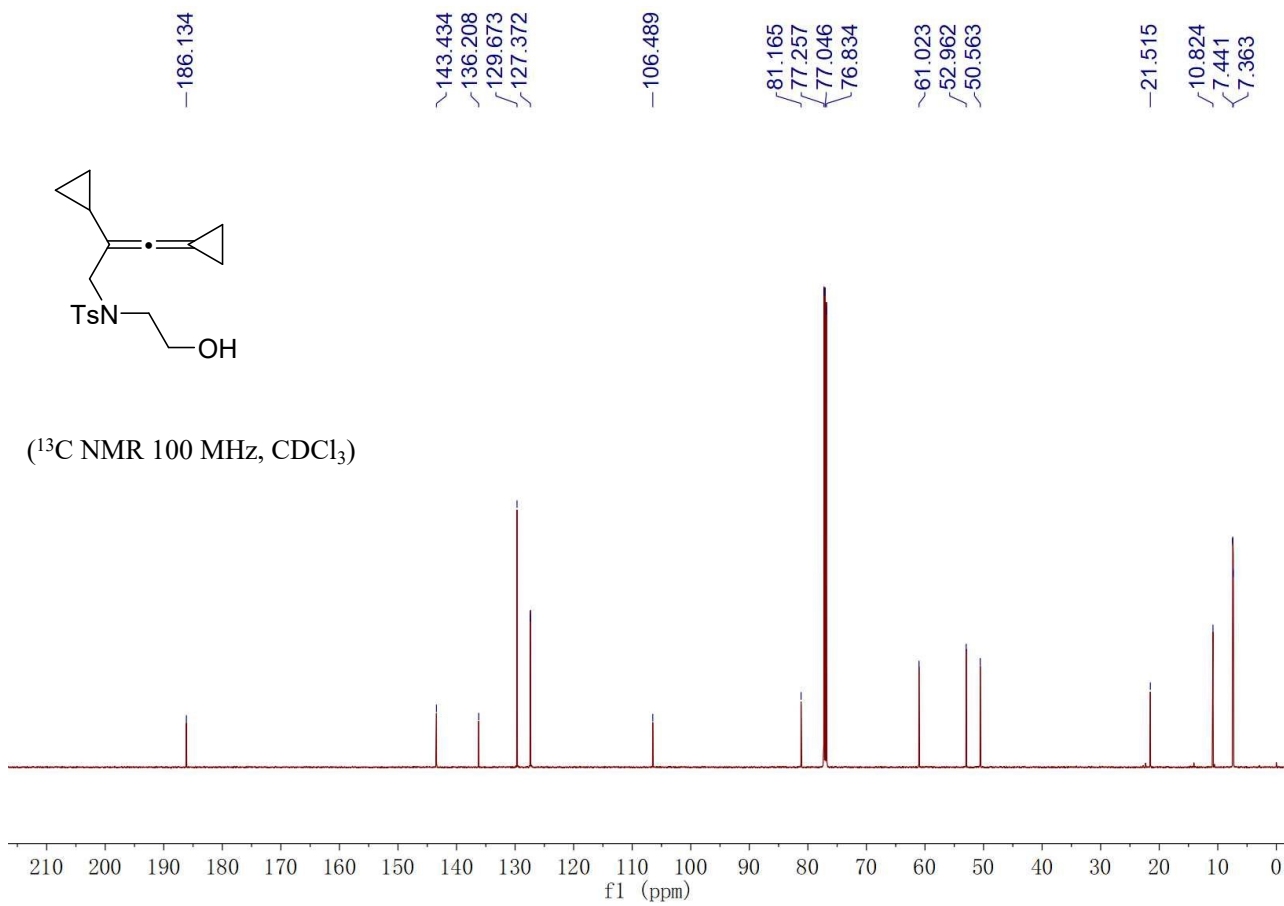

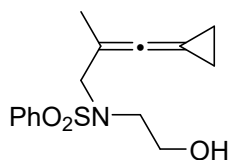

**Compound 1i:** Yield: 533.3 mg, 91%; A yellow oil; Eluent: PE/EA = 2/1;  $^1\text{H}$  NMR (400 MHz,  $\text{CDCl}_3$ , TMS)  $\delta$  7.87 – 7.80 (m, 2H), 7.63 – 7.55 (m, 1H), 7.54 – 7.49 (m, 2H), 3.85 (s, 2H), 3.77 – 3.73 (m, 2H), 3.29 (t,  $J$  = 5.6 Hz, 2H), 2.47 (t,  $J$  = 5.9 Hz, 1H), 1.74 (s, 3H), 1.54 – 1.33 (m, 4H);  $^{13}\text{C}$  NMR (100 MHz,  $\text{CDCl}_3$ , TMS)  $\delta$  188.4, 139.3, 132.7, 129.1, 127.2, 97.9, 78.4, 60.9, 53.8, 50.5, 17.0, 7.1; IR (neat):  $\nu$  3512, 2979, 2909, 2022, 1446, 1372, 1154, 1088, 989, 888, 689  $\text{cm}^{-1}$ ; HRMS (ESI-TOF) Calcd for  $\text{C}_{15}\text{H}_{19}\text{NO}_3\text{NaS}$   $[\text{M}+\text{Na}]^+$ : 316.09779, found: 316.09850.

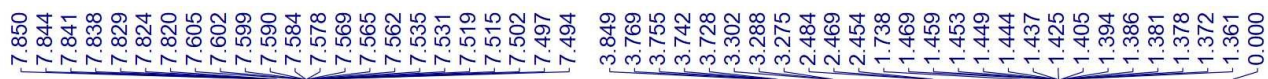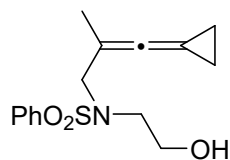

( $^1\text{H}$  NMR 400 MHz,  $\text{CDCl}_3$ )

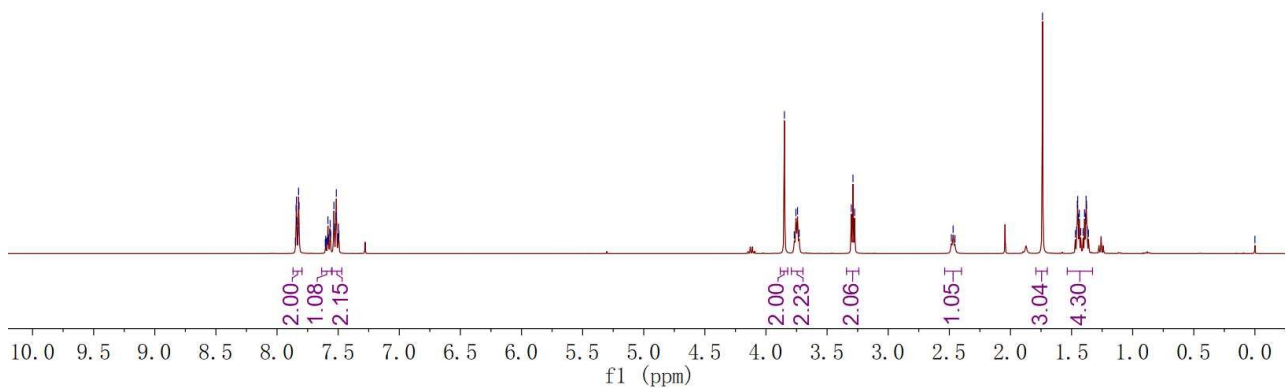

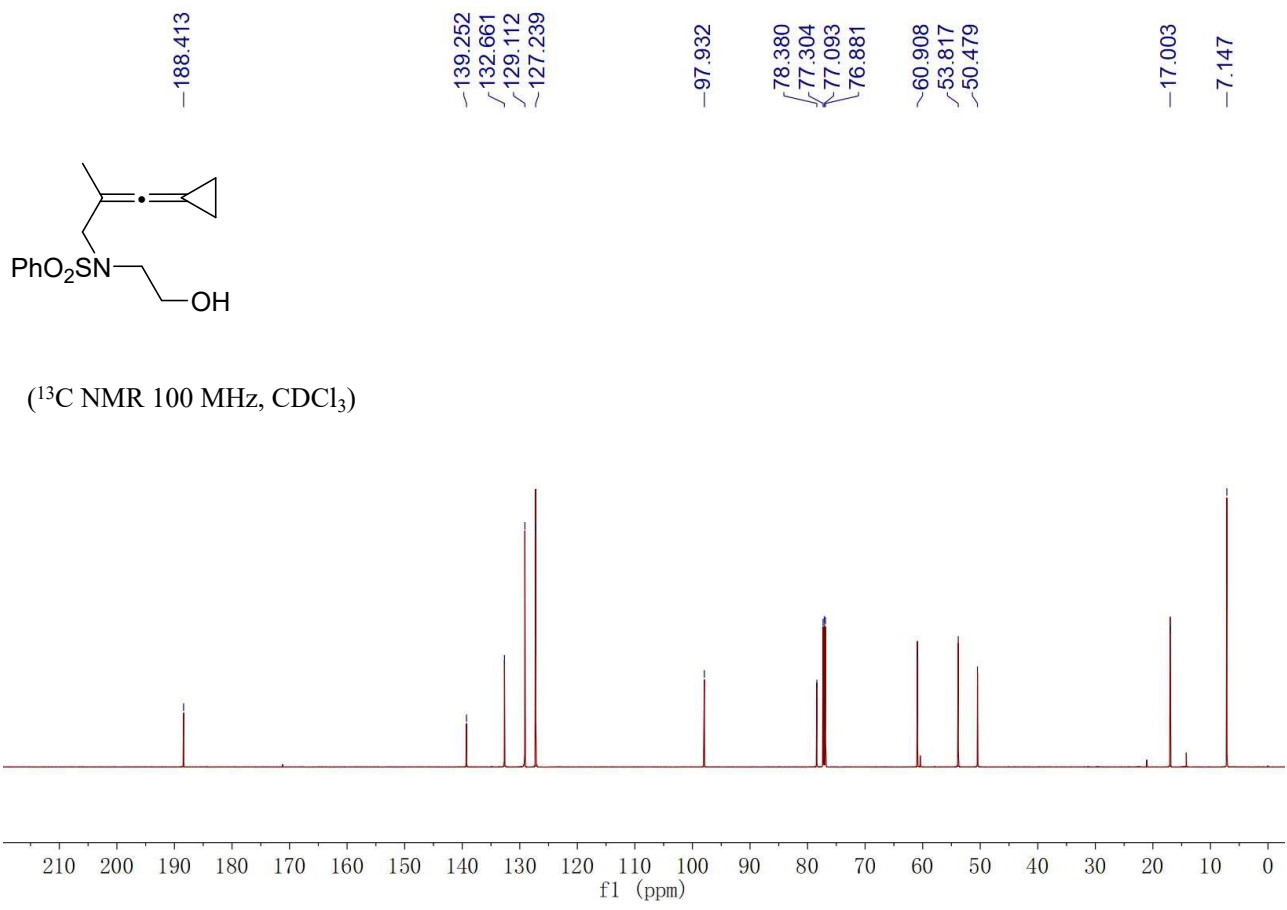

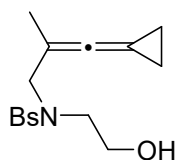

**Compound 1j:** Yield: 712.3 mg, 96%; A colorless solid; Mp: 71 – 74 °C; Eluent: PE/EA = 2/1;  $^1\text{H}$  NMR (400 MHz,  $\text{CDCl}_3$ , TMS)  $\delta$  7.75 – 7.66 (m, 2H), 7.69 – 7.61 (m, 2H), 3.85 (s, 2H), 3.77 – 3.73 (m, 2H), 3.29 (t,  $J = 5.4$  Hz, 2H), 2.36 (t,  $J = 5.9$  Hz, 1H), 1.73 (s, 3H), 1.51 – 1.33 (m, 4H);  $^{13}\text{C}$  NMR (100 MHz,  $\text{CDCl}_3$ , TMS)  $\delta$  188.4, 138.5, 132.3, 128.8, 127.6, 97.7, 78.5, 60.8, 53.6, 50.4, 17.1, 7.2; IR (neat):  $\nu$  3523, 2987, 2909, 2023, 1574, 1388, 1332, 1086, 990, 836, 889, 753, 729  $\text{cm}^{-1}$ ; HRMS (ESI-TOF) Calcd for  $\text{C}_{15}\text{H}_{18}\text{NO}_3\text{NaSBr}$   $[\text{M}+\text{Na}]^+$ : 394.00830, found: 394.00756.

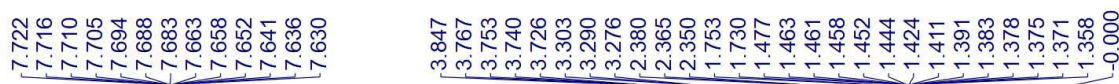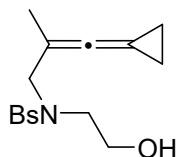

( $^1\text{H}$  NMR 400 MHz,  $\text{CDCl}_3$ )

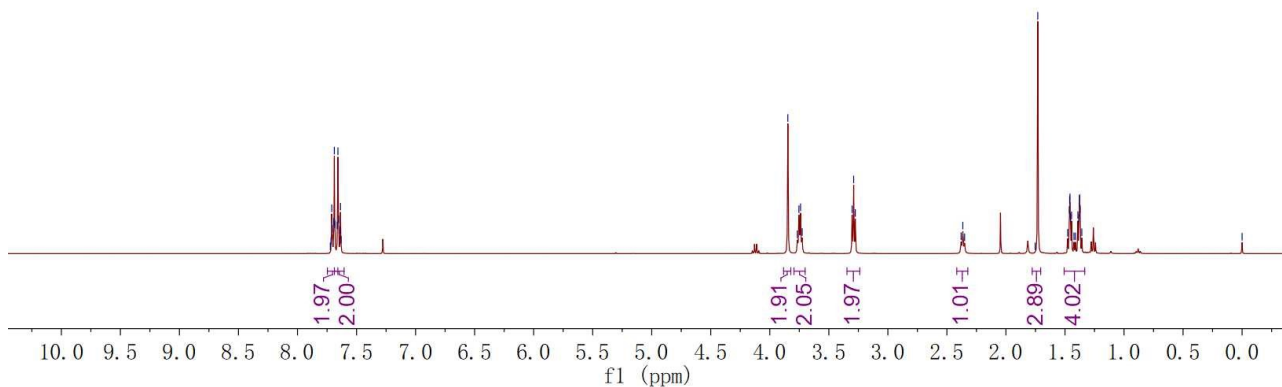

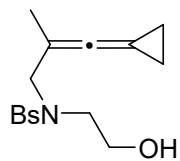

(<sup>13</sup>C NMR 100 MHz, CDCl<sub>3</sub>)

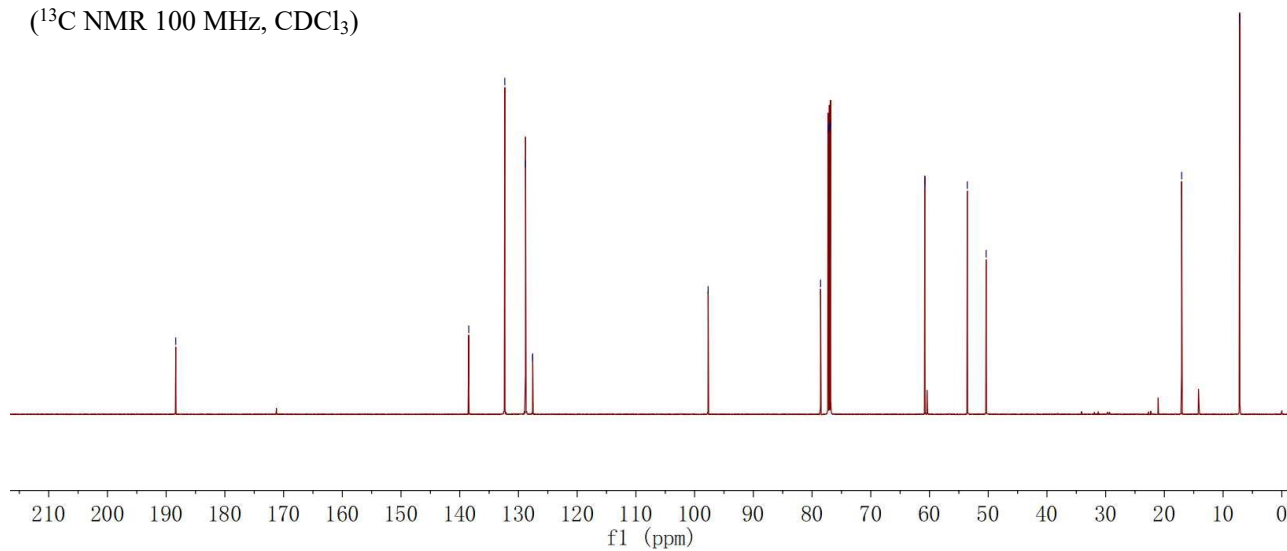

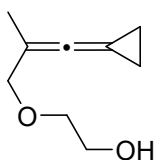

**Compound 1k:** Yield: 268.0 mg, 87%; A yellow oil; Eluent: PE/EA = 2/1;  $^1\text{H}$  NMR (400 MHz,  $\text{CDCl}_3$ , TMS)  $\delta$  4.06 (s, 2H), 3.76 – 3.73 (m, 2H), 3.61 – 3.53 (m, 2H), 1.99 (t,  $J = 6.2$  Hz, 1H), 1.79 (s, 3H), 1.49 (s, 4H);  $^{13}\text{C}$  NMR (100 MHz,  $\text{CDCl}_3$ , TMS)  $\delta$  187.9, 99.2, 73.5, 70.7, 62.0, 16.6, 7.1; IR (neat):  $\nu$  3416, 2908, 2857, 2022, 1369, 1344, 1096, 1059, 972, 890, 835  $\text{cm}^{-1}$ ; HRMS (FI) Calcd for  $\text{C}_9\text{H}_{14}\text{O}_2$ : 154.0988, found: 154.0989.

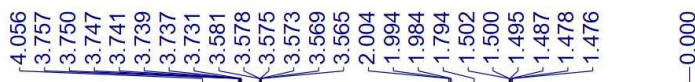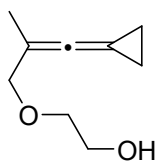

( $^1\text{H}$  NMR 400 MHz,  $\text{CDCl}_3$ )

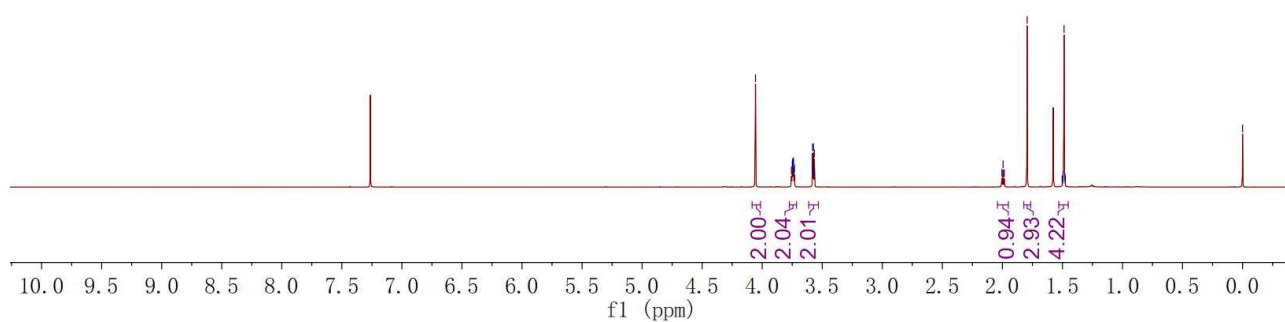

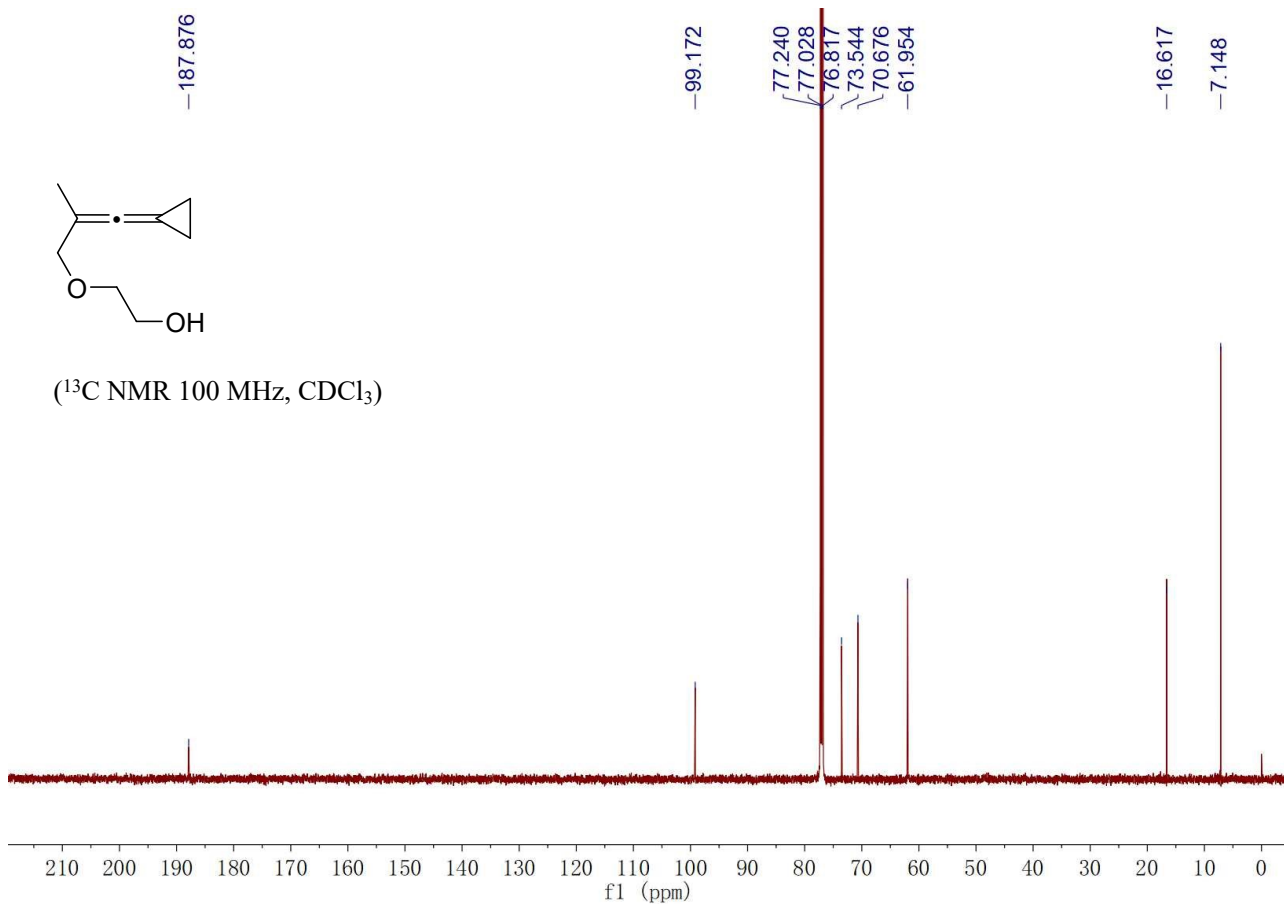

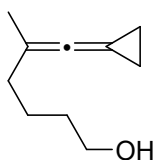

**Compound 11:** Yield: 270.6 mg, 89%; A yellow oil; Eluent: PE/EA = 2/1;  $^1\text{H}$  NMR (400 MHz,  $\text{CDCl}_3$ , TMS)  $\delta$  3.64 (t,  $J = 6.4$  Hz, 2H), 2.05 (t,  $J = 7.4$  Hz, 2H), 1.77 (s, 3H), 1.68 – 1.44 (m, 4H), 1.45 – 1.38 (m, 4H), 1.31 (s, 1H);  $^{13}\text{C}$  NMR (100 MHz,  $\text{CDCl}_3$ , TMS)  $\delta$  186.6, 102.6, 62.9, 34.3, 32.4, 23.7, 19.7, 6.4; IR (neat):  $\nu$  3344, 2967, 2931, 2863, 2020, 1440, 1261, 1088, 909, 733  $\text{cm}^{-1}$ ; HRMS (FI) Calcd for  $\text{C}_{10}\text{H}_{16}\text{O}$ : 152.1196, found: 152.1199.

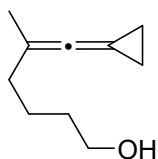

( $^1\text{H}$  NMR 400 MHz,  $\text{CDCl}_3$ )

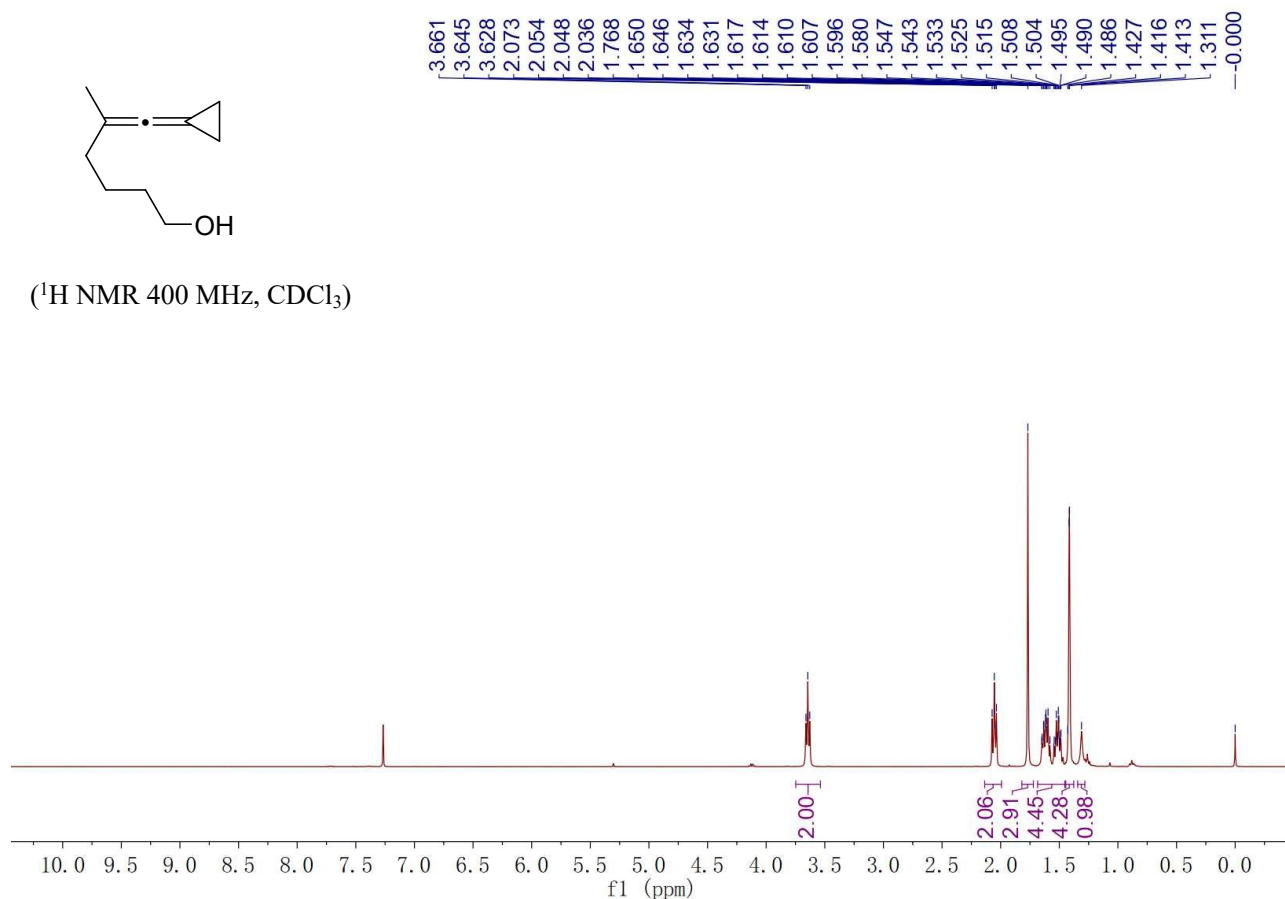



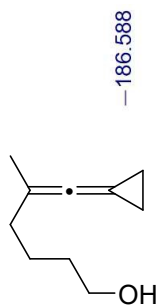

—186.588

—102.581

77.246  
77.034  
76.822

—62.931

34.315  
32.412

—23.733  
—19.717

—6.360

(<sup>13</sup>C NMR 100 MHz, CDCl<sub>3</sub>)

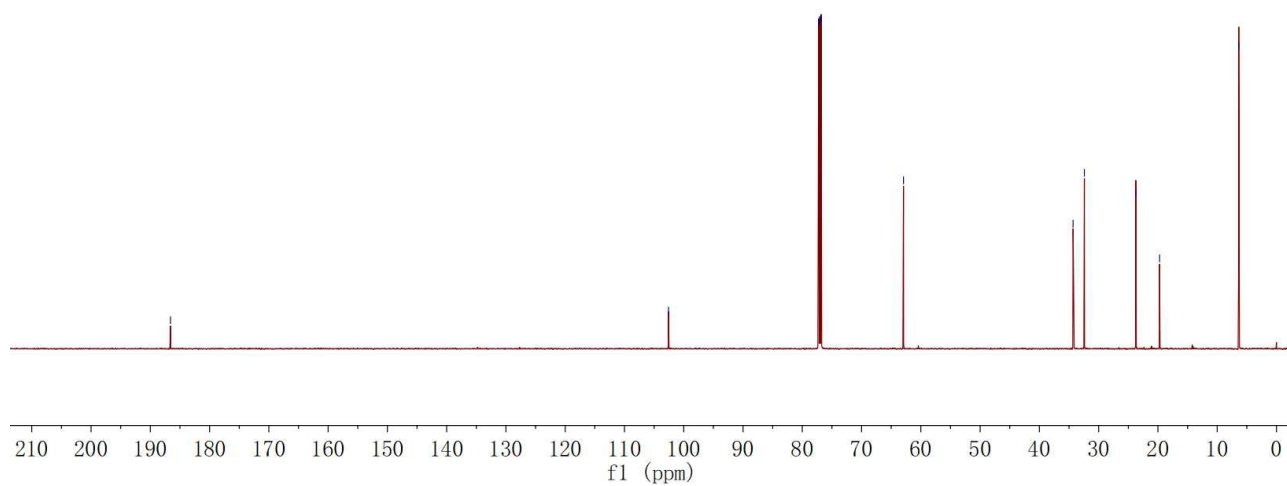

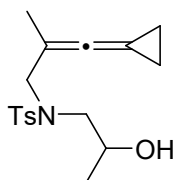

**Compound 1m:** Yield: 420.0 mg, 98%; A yellow oil; Eluent: PE/EA = 2/1;  $^1\text{H}$  NMR (400 MHz,  $\text{CDCl}_3$ , TMS)  $\delta$  7.70 (d,  $J = 8.0$  Hz, 2H), 7.30 (d,  $J = 8.0$  Hz, 2H), 4.05 – 4.00 (m, 1H), 3.94 (d,  $J = 14.5$  Hz, 1H), 3.69 (d,  $J = 14.5$  Hz, 1H), 3.18 – 3.12 (m, 1H), 2.97 – 2.93 (m, 1H), 2.77 (s, 1H), 2.42 (s, 3H), 1.74 (s, 3H), 1.50 – 1.35 (m, 4H), 1.14 (d,  $J = 6.3$  Hz, 3H);  $^{13}\text{C}$  NMR (100 MHz,  $\text{CDCl}_3$ , TMS)  $\delta$  188.5, 143.5, 136.0, 129.7, 127.3, 98.0, 78.2, 66.0, 56.3, 54.5, 21.5, 20.4, 17.1, 7.0; IR (neat):  $\nu$  3520, 2990, 2912, 2033, 1600, 1338, 1154, 1096, 919, 813, 719  $\text{cm}^{-1}$ ; HRMS (ESI-TOF) Calcd for  $\text{C}_{17}\text{H}_{23}\text{NO}_3\text{NaS} [\text{M}+\text{Na}]^+$ : 344.12909, found: 344.12853.

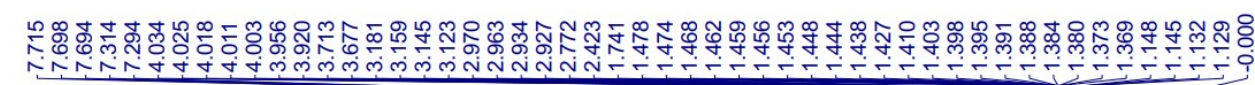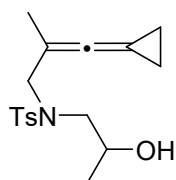

( $^1\text{H}$  NMR 400 MHz,  $\text{CDCl}_3$ )

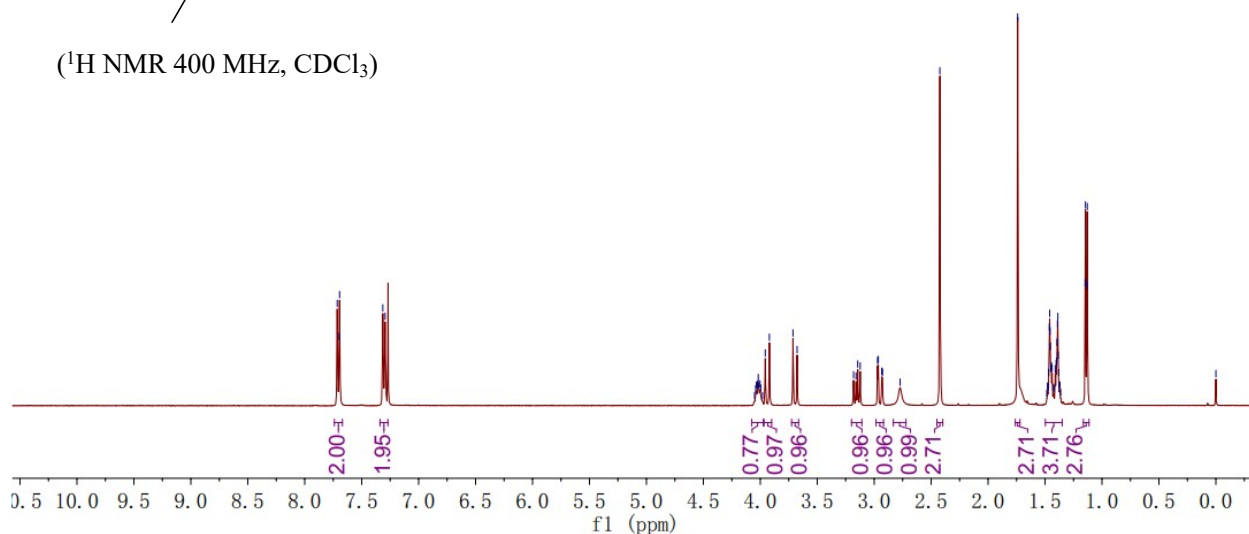

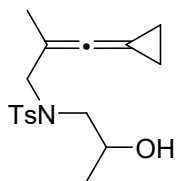

(<sup>13</sup>C NMR 100 MHz, CDCl<sub>3</sub>)

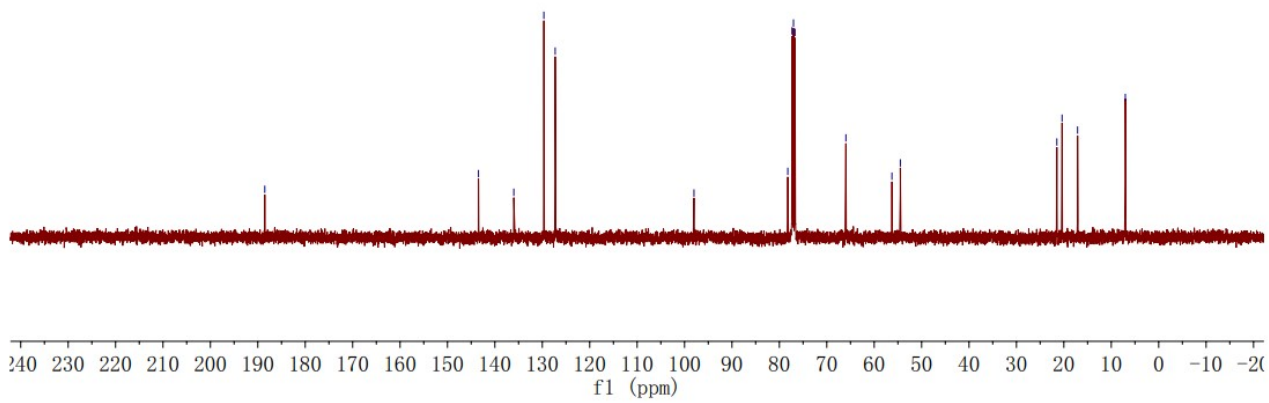

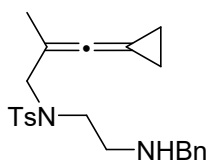

**Compound 1n:** Yield: 641.5 mg, 81%; A yellow oil; Eluent: PE/EA = 1/1;  $^1\text{H}$  NMR (400 MHz,  $\text{CDCl}_3$ , TMS)  $\delta$  7.69 (d,  $J = 7.9$  Hz, 2H), 7.33 – 7.22 (m, 7H), 3.80 (s, 2H), 3.75 (s, 2H), 3.27 (t,  $J = 6.6$  Hz, 2H), 2.81 (t,  $J = 6.5$  Hz, 2H), 2.40 (s, 3H), 1.70 (s, 3H), 1.53 (s, 1H), 1.46 – 1.20 (m, 4H);  $^{13}\text{C}$  NMR (100 MHz,  $\text{CDCl}_3$ , TMS)  $\delta$  188.5, 143.1, 140.2, 136.7, 129.6, 128.3, 128.1, 127.1, 126.9, 97.8, 77.8, 53.5, 53.3, 47.5, 47.3, 21.5, 17.0, 7.0; IR (neat):  $\nu$  3061, 3026, 2982, 2306, 2255, 2022, 1808, 1597, 1088, 847, 813, 728, 657  $\text{cm}^{-1}$ ; HRMS (ESI-TOF) Calcd for  $\text{C}_{23}\text{H}_{29}\text{N}_2\text{O}_2\text{S}$   $[\text{M}+\text{H}]^+$ : 397.19443, found: 397.19440.

7.700  
7.681  
7.328  
7.308  
7.291  
7.283  
7.270  
7.261  
7.249  
7.238  
7.222  
7.217

3.797  
3.747  
3.285  
3.269  
3.252  
2.828  
2.811  
2.795  
2.399  
1.705  
1.542  
1.521  
1.429  
1.411  
1.397  
1.374  
1.362  
1.328  
1.319  
1.312  
1.296  
1.286  
1.266  
1.256  
1.240  
0.000

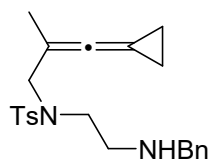

( $^1\text{H}$  NMR 400 MHz,  $\text{CDCl}_3$ )

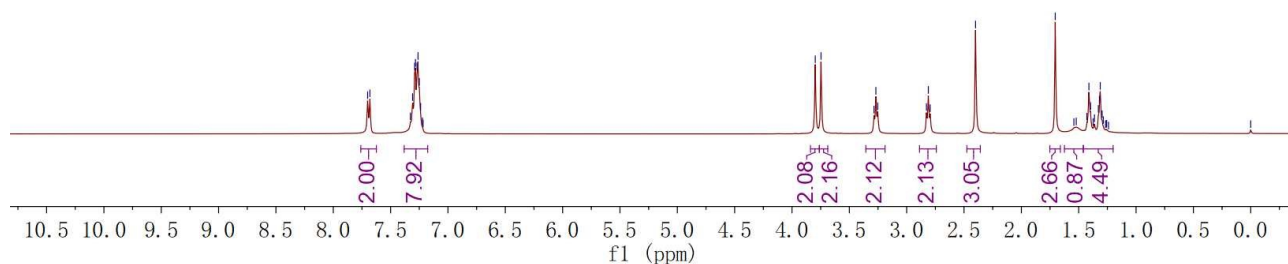

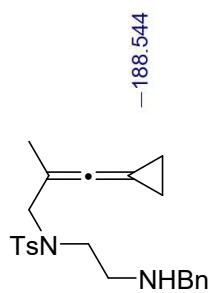

188.544

143.103  
140.177  
136.737  
129.573  
128.323  
128.057  
127.140  
126.886

97.845

77.827  
77.486  
77.159  
76.840

53.457  
53.253  
47.509  
47.303

21.477  
16.971  
7.005

(<sup>13</sup>C NMR 100 MHz, CDCl<sub>3</sub>)

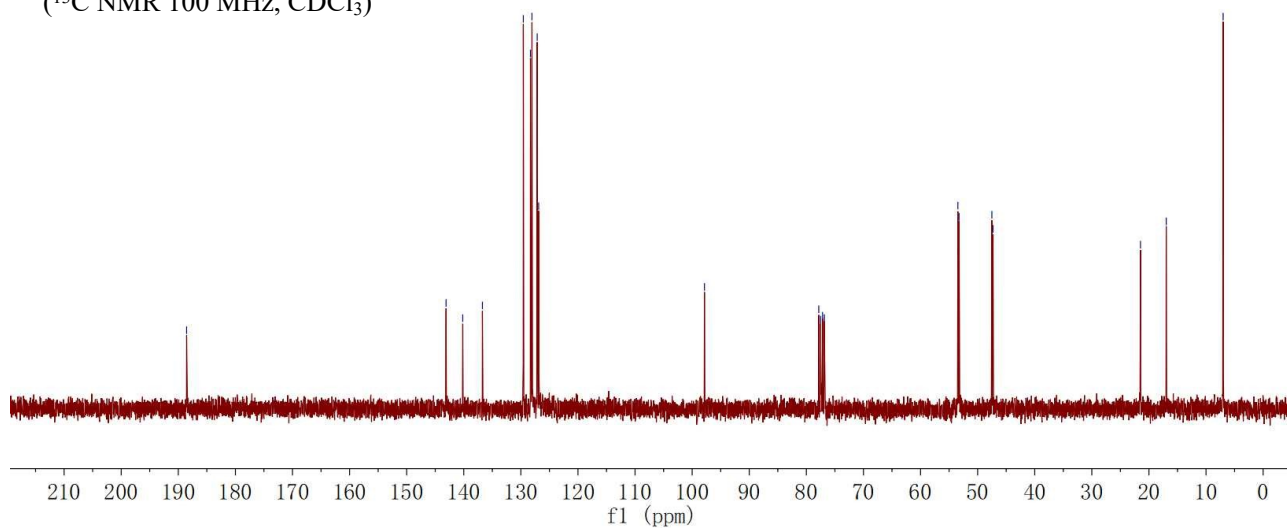

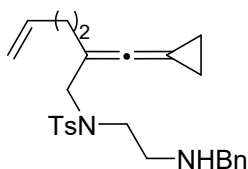

**Compound 10:** Yield: 802.2 mg, 92%; A yellow oil; Eluent: PE/EA = 1/1;  $^1\text{H}$  NMR (400 MHz,  $\text{CDCl}_3$ , TMS)  $\delta$  7.68 (d,  $J = 7.8$  Hz, 2H), 7.31 – 7.20 (m, 7H), 5.81 – 5.71 (m, 1H), 4.97 – 4.90 (m, 2H), 3.82 (s, 2H), 3.74 (s, 2H), 3.26 (t,  $J = 6.6$  Hz, 2H), 2.79 (t,  $J = 6.6$  Hz, 2H), 2.38 (s, 3H), 2.15 – 2.02 (m, 4H), 1.54 (s, 1H), 1.46 – 1.25 (m, 4H);  $^{13}\text{C}$  NMR (100 MHz,  $\text{CDCl}_3$ , TMS)  $\delta$  188.3, 143.1, 140.2, 138.2, 136.7, 129.6, 128.3, 128.0, 127.2, 126.9, 114.7, 102.2, 79.5, 53.5, 52.3, 47.5, 47.3, 31.7, 29.5, 21.5, 7.2; IR (neat):  $\nu$  2917, 2843, 2020, 1639, 1597, 1493, 1333, 1155, 993, 813, 732, 657  $\text{cm}^{-1}$ ; HRMS (ESI-TOF) Calcd for  $\text{C}_{26}\text{H}_{33}\text{N}_2\text{O}_2\text{S}$   $[\text{M}+\text{H}]^+$ : 437.22573, found: 437.22558.

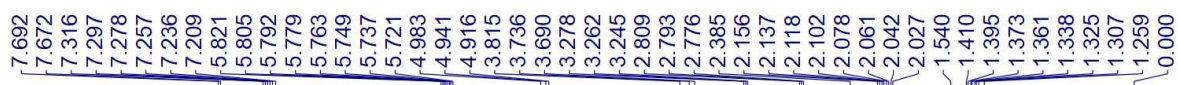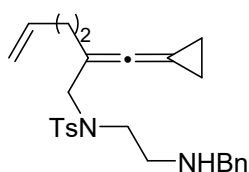

( $^1\text{H}$  NMR 400 MHz,  $\text{CDCl}_3$ )

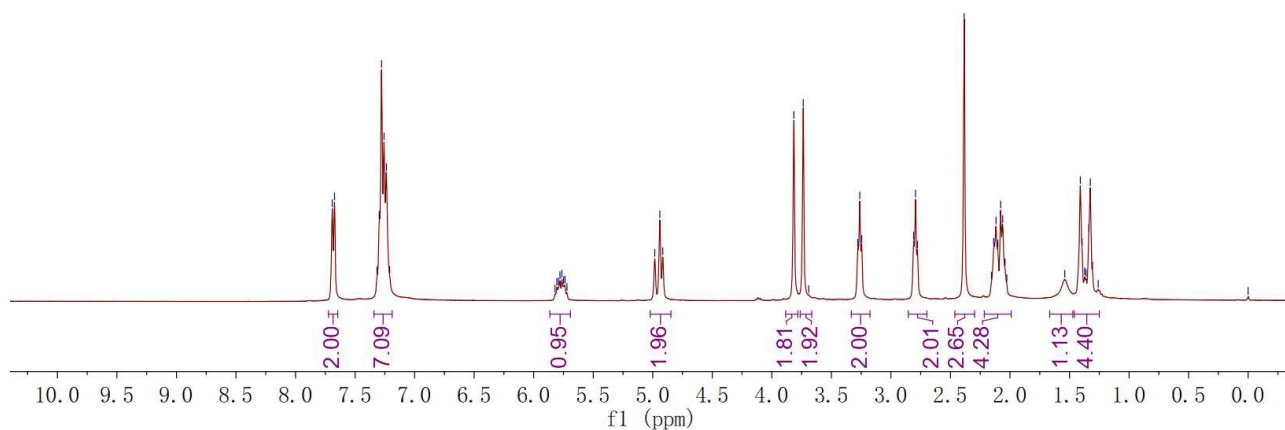

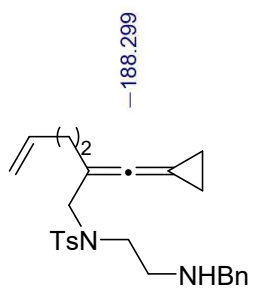

- 188.299
- 143.118
- 140.198
- 138.169
- 136.709
- 129.584
- 128.337
- 128.049
- 127.169
- 126.902
- 114.729
- 102.221
- 79.493
- 77.472
- 77.153
- 76.836
- 53.492
- 52.271
- 47.515
- 47.339
- 31.685
- 29.458
- 21.486
- 7.199

(<sup>13</sup>C NMR 100 MHz, CDCl<sub>3</sub>)

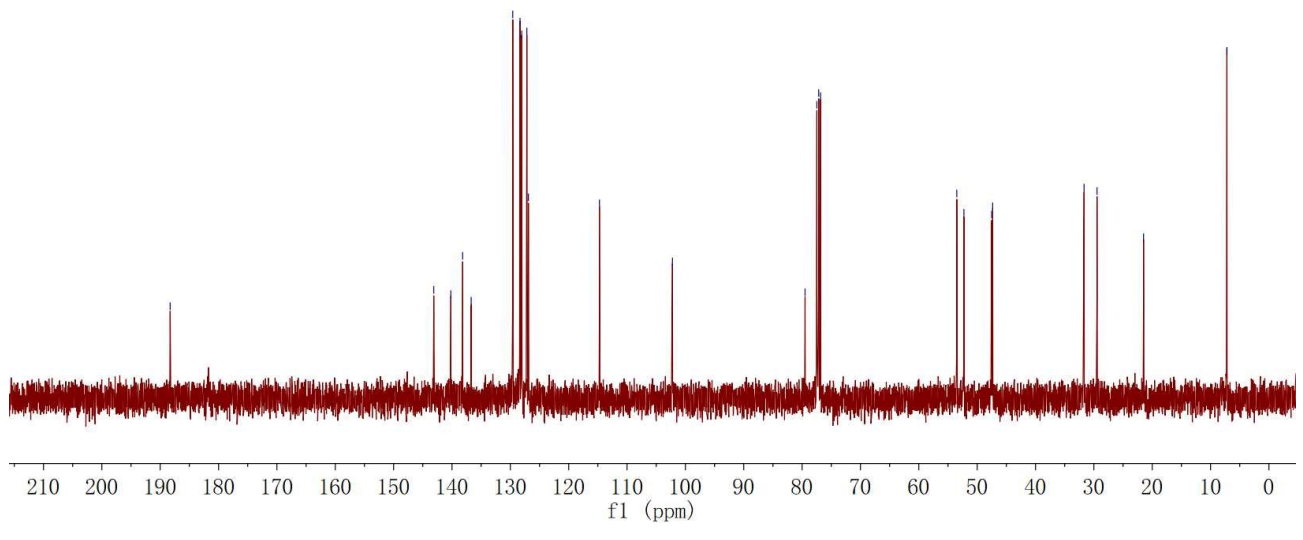

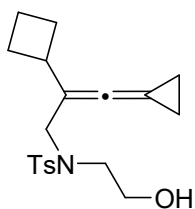

**Compound 1p:** Yield: 610.7 mg, 88%; A colorless solid; Mp: 73 –75 °C; Eluent: PE/EA = 2/1; <sup>1</sup>H NMR (400 MHz, CDCl<sub>3</sub>, TMS) δ 7.70 (d, *J* = 7.9 Hz, 2H), 7.30 (d, *J* = 8.0 Hz, 2H), 3.78 (s, 2H), 3.73 – 3.69 (m, 2H), 3.24 (t, *J* = 5.4 Hz, 2H), 2.96 – 2.82 (m, 1H), 2.56 – 2.54 (m, 1H), 2.42 (s, 3H), 2.18 – 2.06 (m, 2H), 2.00 – 1.69 (m, 5H), 1.58 – 1.36 (m, 4H); <sup>13</sup>C NMR (100 MHz, CDCl<sub>3</sub>, TMS) δ 187.1, 143.4, 136.2, 129.7, 127.3, 107.9, 80.7, 61.0, 51.1, 50.6, 35.4, 28.0, 21.5, 18.0, 7.4; IR (neat): ν 3066, 3026, 2964, 1594, 1506, 1355, 1261, 1088, 965, 836, 829 cm<sup>-1</sup>; HRMS (ESI-TOF) Calcd for C<sub>19</sub>H<sub>25</sub>NO<sub>3</sub>NaS [M+Na]<sup>+</sup>: 370.14474, found: 370.14562.

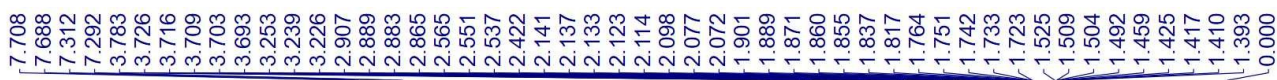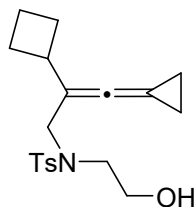

(<sup>1</sup>H NMR 400 MHz, CDCl<sub>3</sub>)

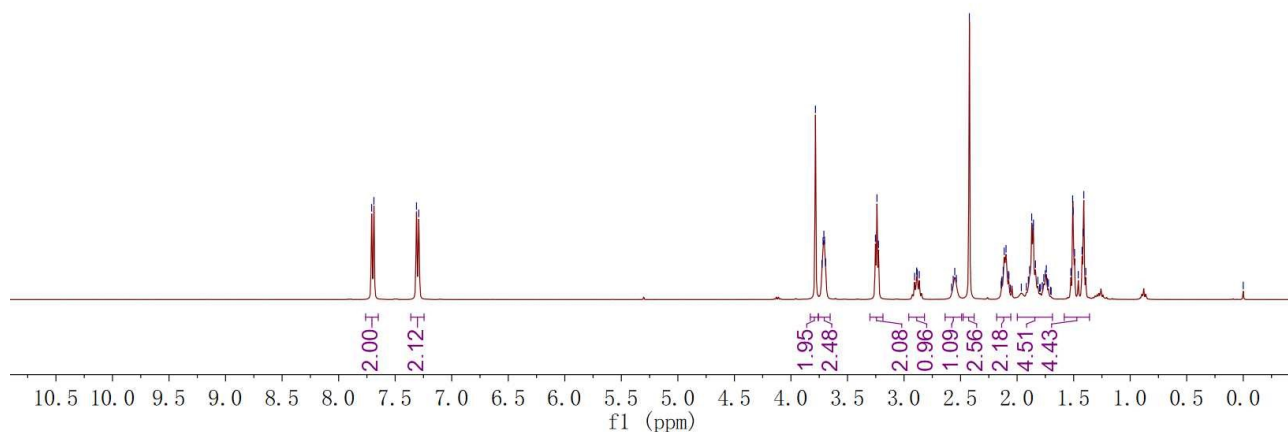



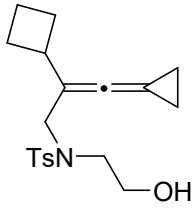

-187.149

143.411  
136.204  
129.668  
127.309

-107.854

80.719  
77.316  
77.106  
76.895

-60.965

51.082  
50.550

35.448  
28.029  
21.492  
17.998

-7.419

(<sup>13</sup>C NMR 100 MHz, CDCl<sub>3</sub>)

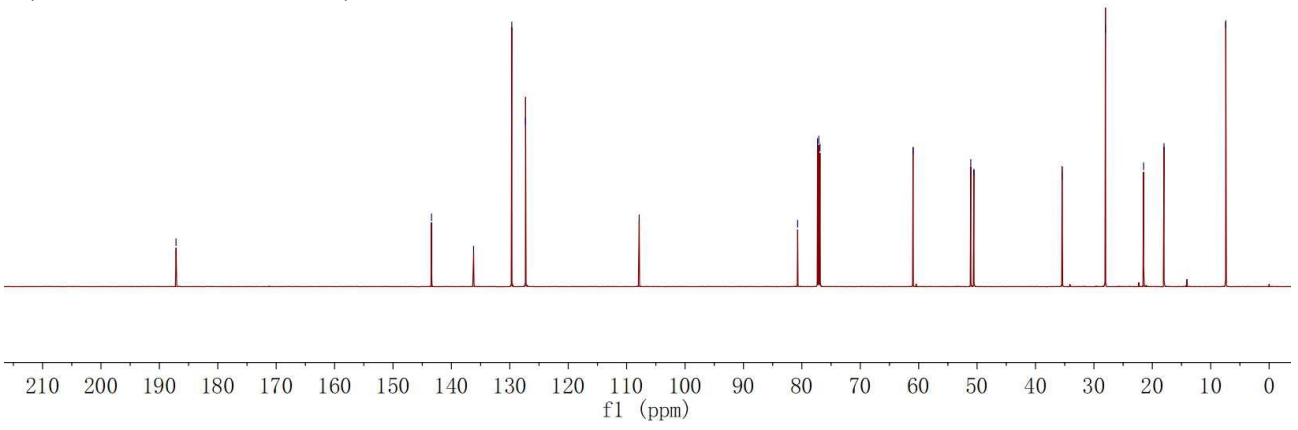

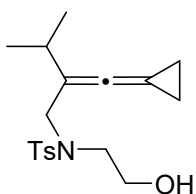

**Compound 1q:** Yield: 649.9 mg, 97%; A colorless solid; Mp: 89 – 91 °C; Eluent: PE/EA = 2/1; <sup>1</sup>H NMR (400 MHz, CDCl<sub>3</sub>, TMS) δ 7.75 – 7.67 (m, 2H), 7.30 (d, *J* = 8.0 Hz, 2H), 3.88 (s, 2H), 3.74 – 3.70 (m, 2H), 3.23 (t, *J* = 5.3 Hz, 2H), 2.43 (s, 3H), 2.28 (hept, *J* = 6.7 Hz, 1H), 1.51 – 1.44 (m, 2H), 1.43 – 1.34 (m, 2H), 1.04 (d, *J* = 6.7 Hz, 6H); <sup>13</sup>C NMR (100 MHz, CDCl<sub>3</sub>, TMS) δ 187.2, 143.4, 136.0, 129.7, 127.4, 109.5, 80.4, 61.1, 51.6, 50.7, 28.7, 21.6, 21.5, 7.3; IR (neat): ν 3566, 3026, 2957, 2924, 1445, 1355, 1300, 1088, 981, 928, 809 cm<sup>-1</sup>; HRMS (ESI-TOF) Calcd for C<sub>18</sub>H<sub>25</sub>NO<sub>3</sub>NaS [M+Na]<sup>+</sup>: 358.14474, found: 358.14493.

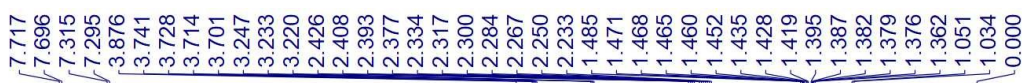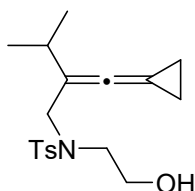

(<sup>1</sup>H NMR 400 MHz, CDCl<sub>3</sub>)

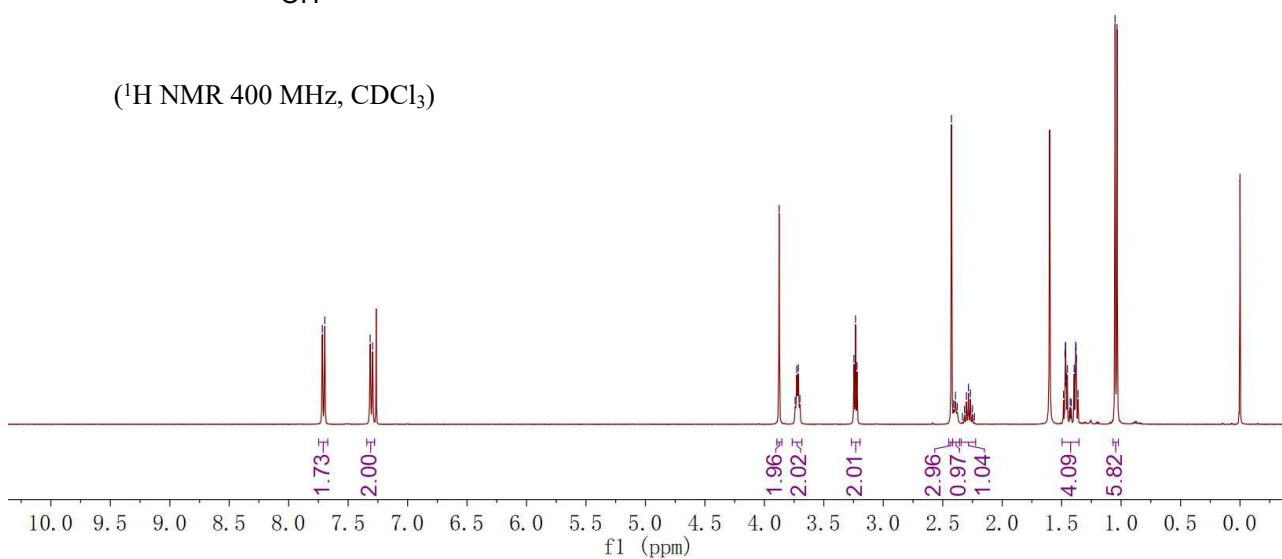

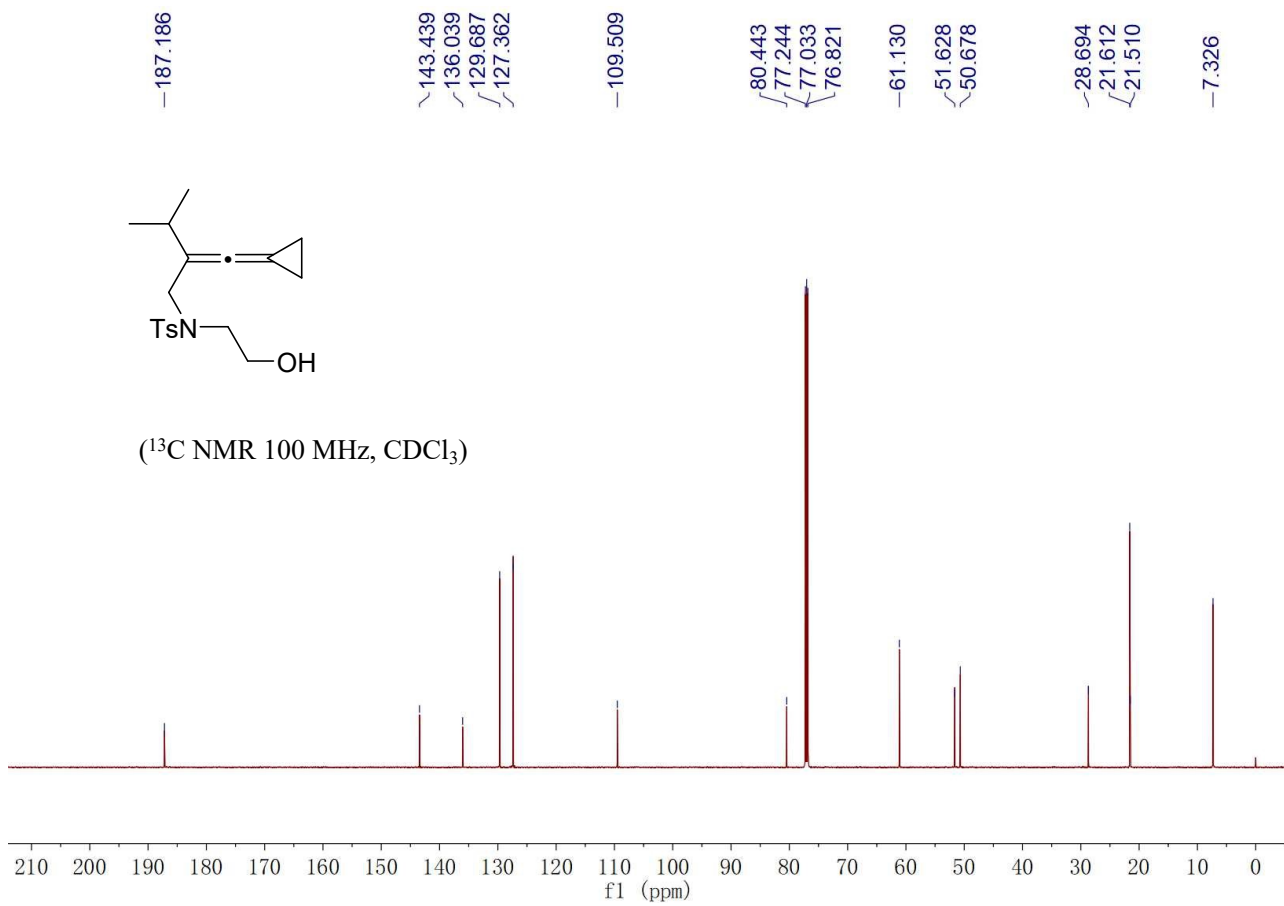

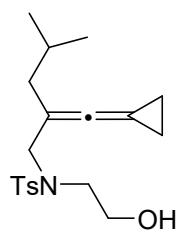

**Compound 1r:** Yield: 691.0 mg, 99%; A yellow oil; Eluent: PE/EA = 2/1;  $^1\text{H}$  NMR (400 MHz,  $\text{CDCl}_3$ , TMS)  $\delta$  7.71 (d,  $J = 7.9$  Hz, 2H), 7.30 (d,  $J = 7.9$  Hz, 2H), 3.81 (s, 2H), 3.76 – 3.72 (m, 2H), 3.26 (t,  $J = 5.6$  Hz, 2H), 2.54 (t,  $J = 5.6$  Hz, 1H), 2.42 (s, 3H), 1.87 (d,  $J = 7.0$  Hz, 2H), 1.78 – 1.65 (m, 1H), 1.44 – 1.34 (m, 4H), 0.90 – 0.88 (m, 6H);  $^{13}\text{C}$  NMR (100 MHz,  $\text{CDCl}_3$ , TMS)  $\delta$  188.6, 143.4, 136.1, 129.6, 127.3, 101.6, 78.9, 60.9, 52.8, 50.4, 39.5, 26.6, 22.5, 21.5, 7.0; IR (neat):  $\nu$  3066, 3026, 2964, 1594, 1506, 1355, 1261, 1088, 965, 836, 829  $\text{cm}^{-1}$ ; HRMS (ESI-TOF) Calcd for  $\text{C}_{19}\text{H}_{27}\text{NO}_3\text{NaS}$   $[\text{M}+\text{Na}]^+$ : 372.16039, found: 372.16039.

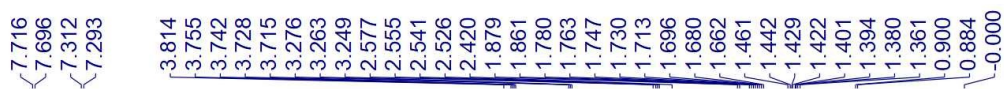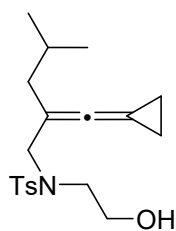

( $^1\text{H}$  NMR 400 MHz,  $\text{CDCl}_3$ )

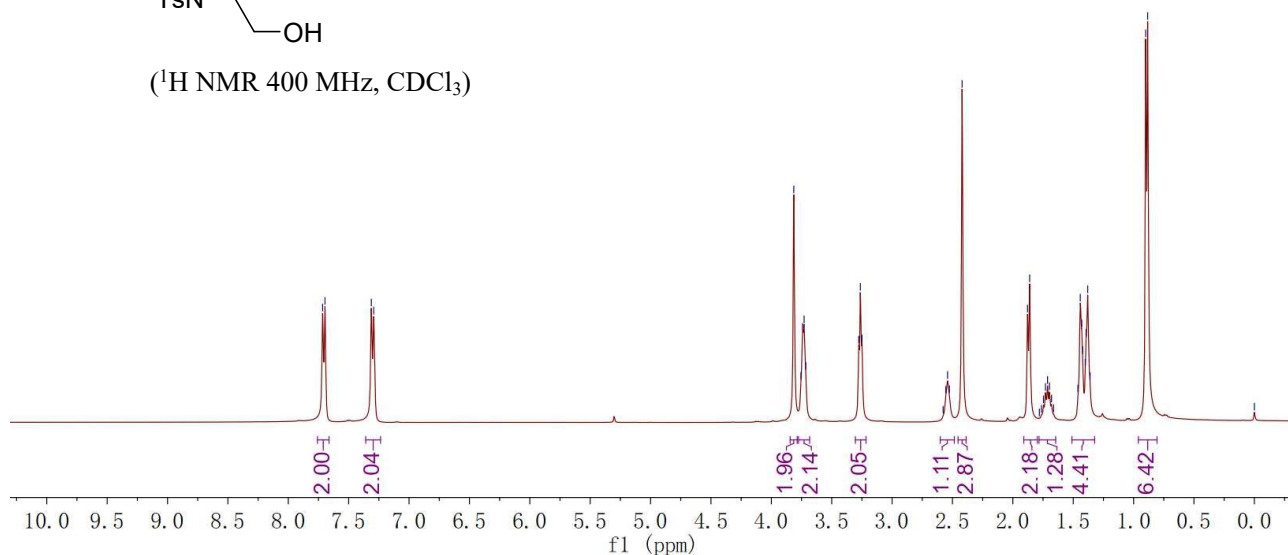

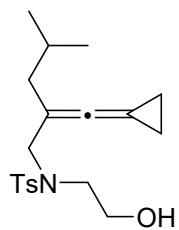

(<sup>13</sup>C NMR 100 MHz, CDCl<sub>3</sub>)

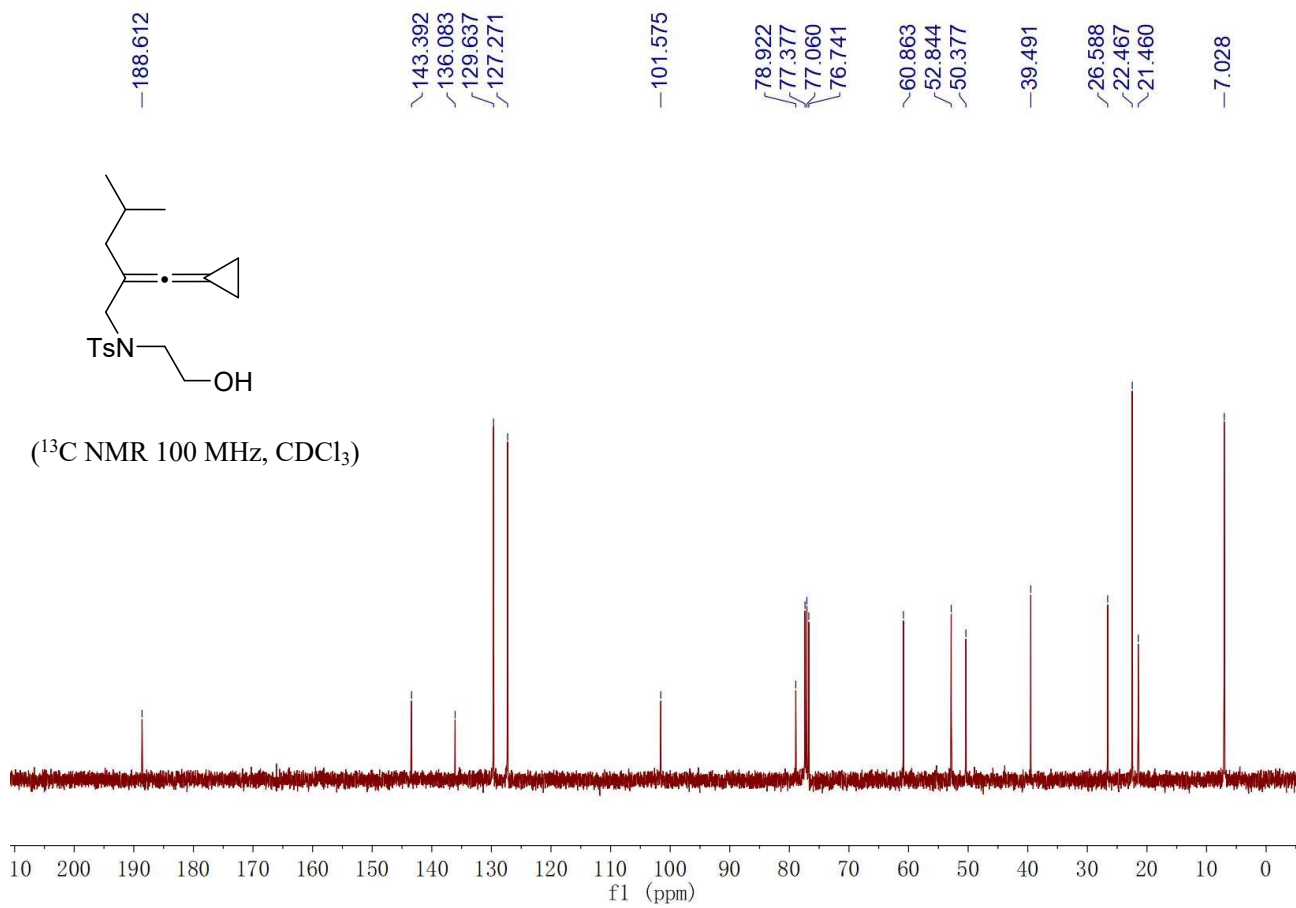

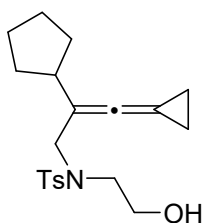

**Compound 1s:** Yield: 648.9 mg, 90%; A yellow oil; Eluent: PE/EA = 2/1;  $^1\text{H}$  NMR (400 MHz,  $\text{CDCl}_3$ , TMS)  $\delta$  7.74 – 7.67 (m, 2H), 7.30 (d,  $J = 8.1$  Hz, 2H), 3.87 (s, 2H), 3.74 – 3.71 (m, 2H), 3.26 (t,  $J = 5.5$  Hz, 2H), 2.55 (s, 1H), 2.42 – 2.37 (m, 4H), 1.86 – 1.79 (m, 2H), 1.66 – 1.58 (m, 4H), 1.56 – 1.36 (m, 6H);  $^{13}\text{C}$  NMR (100 MHz,  $\text{CDCl}_3$ , TMS)  $\delta$  186.8, 143.3, 136.1, 129.6, 127.3, 107.5, 80.2, 61.0, 52.4, 50.5, 40.1, 31.8, 24.9, 21.4, 7.2; IR (neat):  $\nu$  3066, 3026, 2964, 1594, 1506, 1355, 1261, 1088, 965, 836, 829  $\text{cm}^{-1}$ ; HRMS (ESI-TOF) Calcd for  $\text{C}_{20}\text{H}_{27}\text{NO}_3\text{NaS}$   $[\text{M}+\text{Na}]^+$ : 384.16039, found: 384.16088.

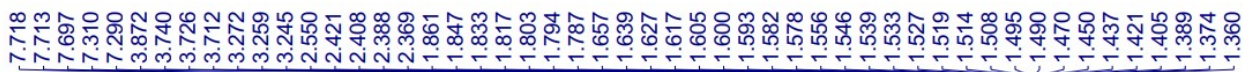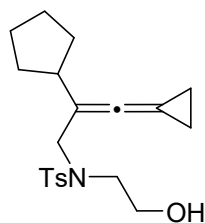

( $^1\text{H}$  NMR 400 MHz,  $\text{CDCl}_3$ )

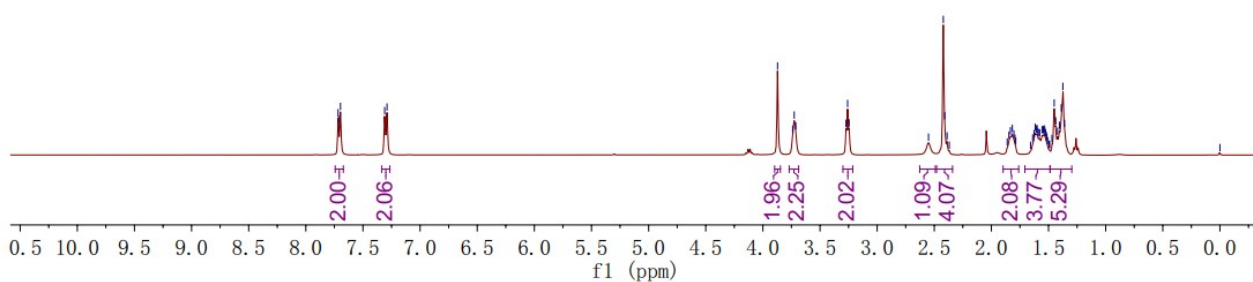

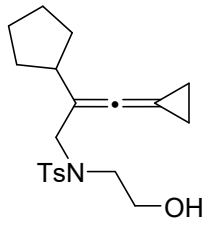

(<sup>13</sup>C NMR 100 MHz, CDCl<sub>3</sub>)

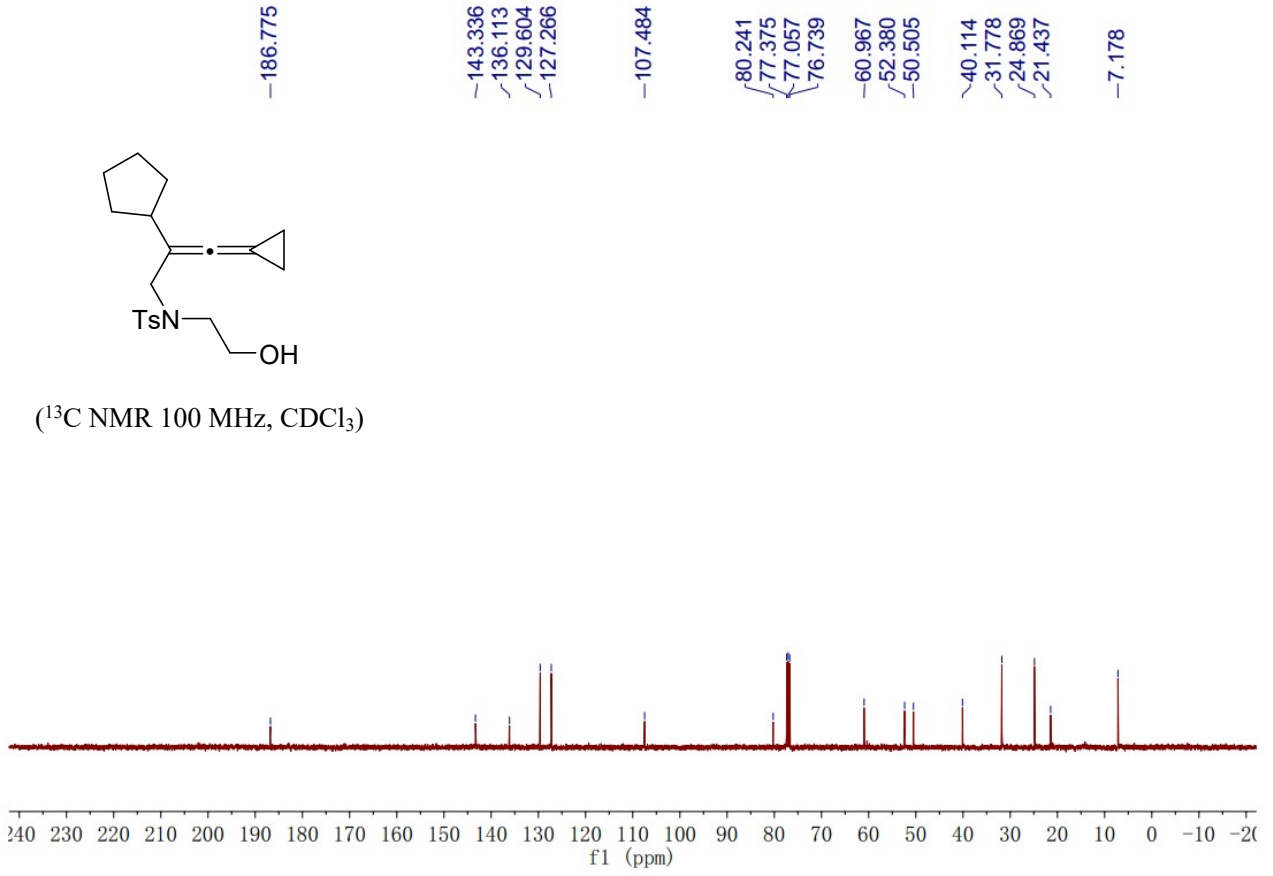

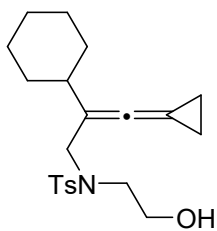

**Compound 1t:** Yield: 660.0 mg, 83%; A yellow oil; Eluent: PE/EA = 2/1;  $^1\text{H}$  NMR (400 MHz,  $\text{CDCl}_3$ , TMS)  $\delta$  7.74 – 7.67 (m, 2H), 7.30 (d,  $J$  = 8.0 Hz, 2H), 3.86 (s, 2H), 3.72 (t,  $J$  = 5.3 Hz, 2H), 3.25 (t,  $J$  = 5.3 Hz, 2H), 2.49 (s, 1H), 2.42 (s, 3H), 1.91 – 1.59 (m, 8H), 1.50 – 1.30 (m, 4H), 1.34 – 1.00 (m, 5H);  $^{13}\text{C}$  NMR (100 MHz,  $\text{CDCl}_3$ , TMS)  $\delta$  187.8, 143.4, 136.2, 129.7, 127.4, 108.5, 80.1, 61.0, 51.3, 50.4, 38.2, 32.1, 26.3, 26.2, 21.5, 7.3; IR (neat):  $\nu$  3523, 2850, 2017, 1594, 1496, 1355, 1301, 1088, 965, 909, 829, 706  $\text{cm}^{-1}$ ; HRMS (ESI-TOF) Calcd for  $\text{C}_{21}\text{H}_{29}\text{NO}_3\text{NaS}$   $[\text{M}+\text{Na}]^+$ : 398.17604, found: 398.17640.

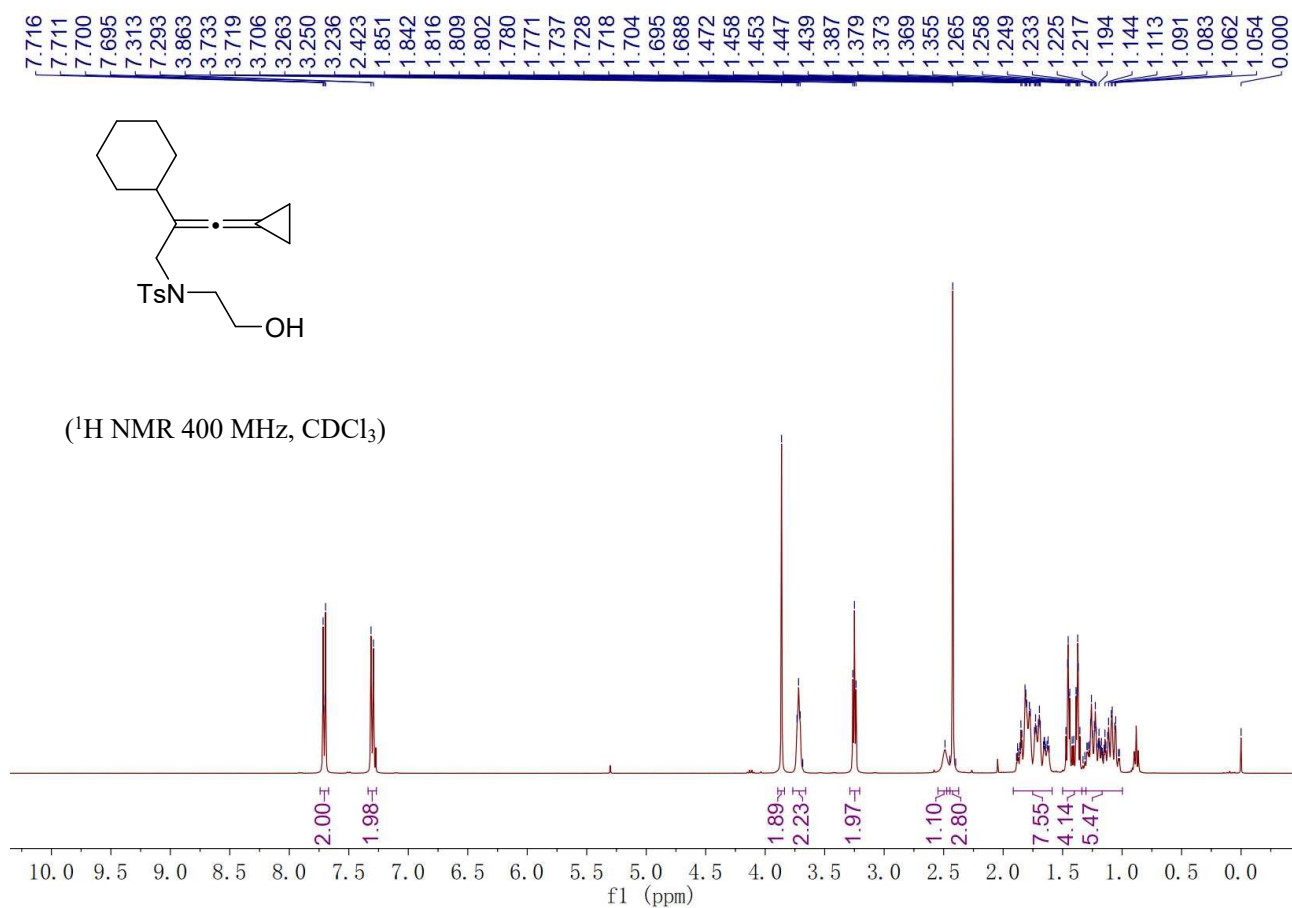



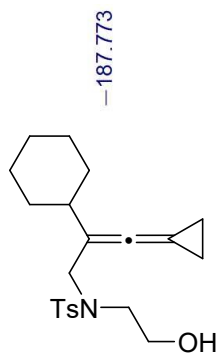

-187.773

143.420  
136.166  
129.685  
127.364

-108.451

80.083  
77.278  
77.067  
76.853

-61.028  
51.237  
51.237  
50.447

-38.212  
32.136  
26.345  
26.225  
-21.500

-7.325

( $^{13}\text{C}$  NMR 100 MHz,  $\text{CDCl}_3$ )

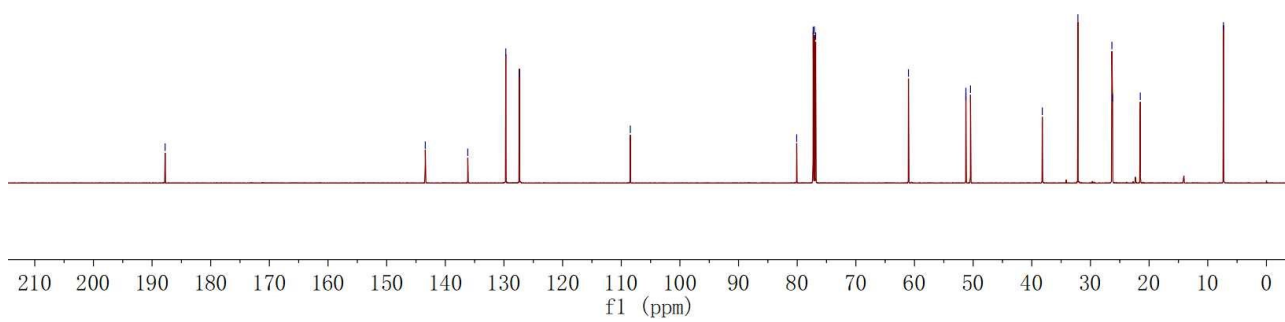

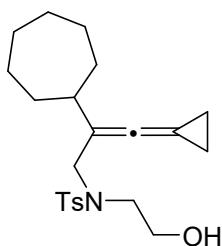

**Compound 1u:** Yield: 575.7 mg, 74%; A yellow oil; Eluent: PE/EA = 2/1;  $^1\text{H}$  NMR (400 MHz,  $\text{CDCl}_3$ , TMS)  $\delta$  7.71 (d,  $J = 8.0$  Hz, 2H), 7.30 (d,  $J = 8.0$  Hz, 2H), 3.86 (s, 2H), 3.74 – 3.70 (m, 2H), 3.25 (t,  $J = 5.3$  Hz, 2H), 2.44 – 2.42 (m, 4H), 2.10 – 2.03 (m, 1H), 1.86 – 1.78 (m, 2H), 1.70 – 1.20 (m, 15H);  $^{13}\text{C}$  NMR (100 MHz,  $\text{CDCl}_3$ , TMS)  $\delta$  187.6, 143.4, 136.2, 129.7, 127.4, 109.5, 80.3, 61.1, 51.7, 50.6, 39.8, 33.7, 28.3, 26.2, 21.5, 7.2; IR (neat):  $\nu$  3520, 2853, 2017, 1445, 1339, 1305, 1088, 991, 888, 728  $\text{cm}^{-1}$ ; HRMS (ESI-TOF) Calcd for  $\text{C}_{22}\text{H}_{31}\text{NO}_3\text{NaS}$   $[\text{M}+\text{Na}]^+$ : 412.19169, found: 412.19264.

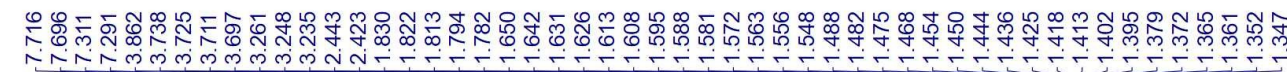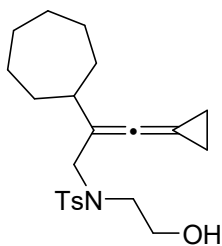

( $^1\text{H}$  NMR 400 MHz,  $\text{CDCl}_3$ )

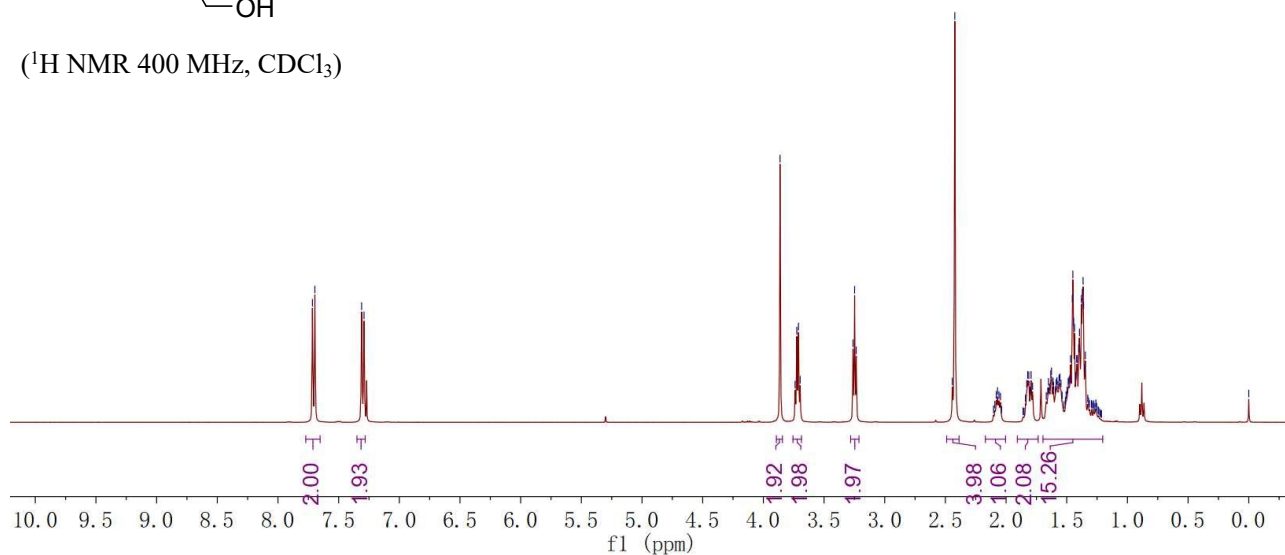

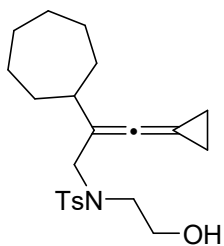

~187.618

~143.396

~136.226

~129.670

~127.352

~109.500

~80.260

~77.261

~77.051

~76.840

~61.075

~51.744

~50.604

~39.822

~33.681

~28.322

~26.235

~21.493

~7.235

(<sup>13</sup>C NMR 100 MHz, CDCl<sub>3</sub>)

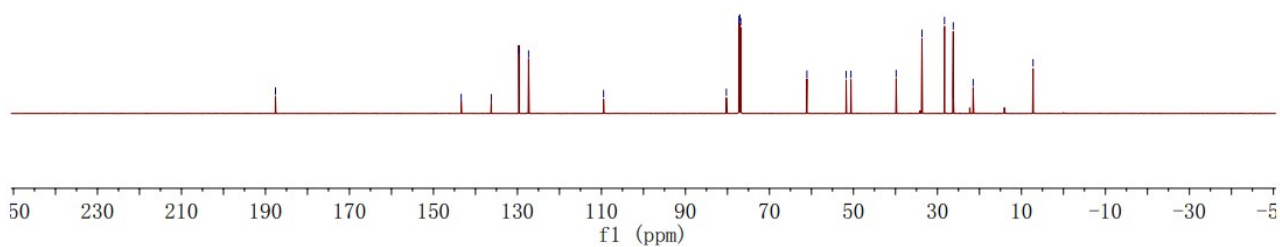

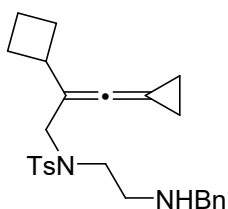

**Compound 1v:** Yield: 767.4 mg, 88%; A yellow oil; Eluent: PE/EA = 1/1;  $^1\text{H}$  NMR (400 MHz,  $\text{CDCl}_3$ , TMS)  $\delta$  7.67 (d,  $J = 7.8$  Hz, 2H), 7.28 – 7.18 (m, 7H), 3.76 (s, 2H), 3.72 (s, 2H), 3.25 (t,  $J = 6.4$  Hz, 2H), 2.86 (t,  $J = 8.2$  Hz, 1H), 2.77 (t,  $J = 6.4$  Hz, 2H), 2.37 (s, 3H), 2.08 – 2.02 (m, 2H), 1.93 – 1.64 (m, 4H), 1.58 (s, 1H), 1.49 – 1.27 (m, 4H);  $^{13}\text{C}$  NMR (100 MHz,  $\text{CDCl}_3$ , TMS)  $\delta$  187.3, 143.0, 140.2, 136.8, 129.5, 128.3, 128.0, 127.1, 126.8, 107.6, 80.2, 53.4, 50.4, 47.4, 47.3, 35.3, 28.0, 21.4, 18.0, 7.3; IR (neat):  $\nu$  2974, 2932, 2859, 2017, 1597, 1493, 1333, 1154, 908, 813, 733, 698, 649  $\text{cm}^{-1}$ ; HRMS (ESI-TOF) Calcd for  $\text{C}_{26}\text{H}_{33}\text{N}_2\text{O}_2\text{S}$   $[\text{M}+\text{H}]^+$ : 437.22573, found: 437.22591

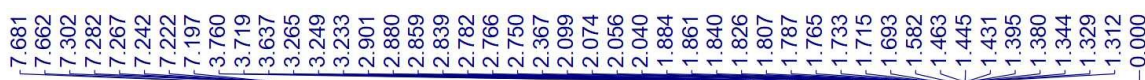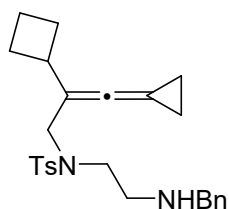

( $^1\text{H}$  NMR 400 MHz,  $\text{CDCl}_3$ )

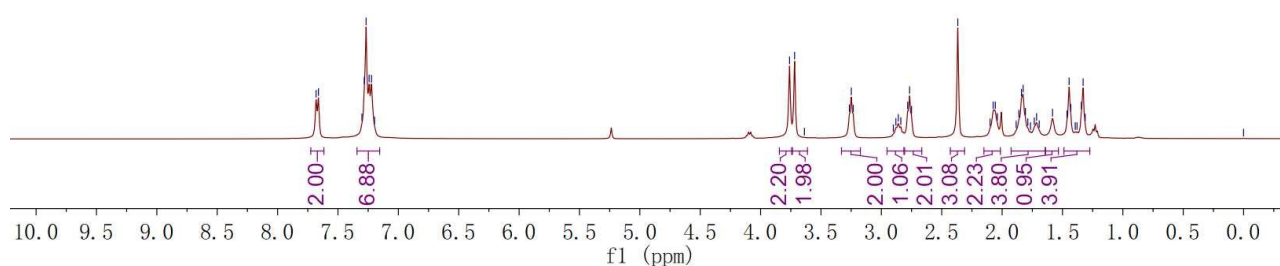

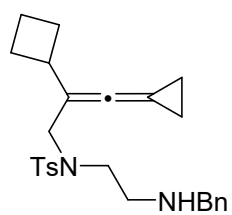

-187.307

143.003  
140.216  
136.786  
129.510  
128.260  
128.021  
127.107  
126.820

-107.597

80.233  
77.616  
77.295  
76.976

53.398  
50.383  
47.442  
47.252

35.306  
28.008  
21.415  
17.953

-7.281

(<sup>13</sup>C NMR 100 MHz, CDCl<sub>3</sub>)

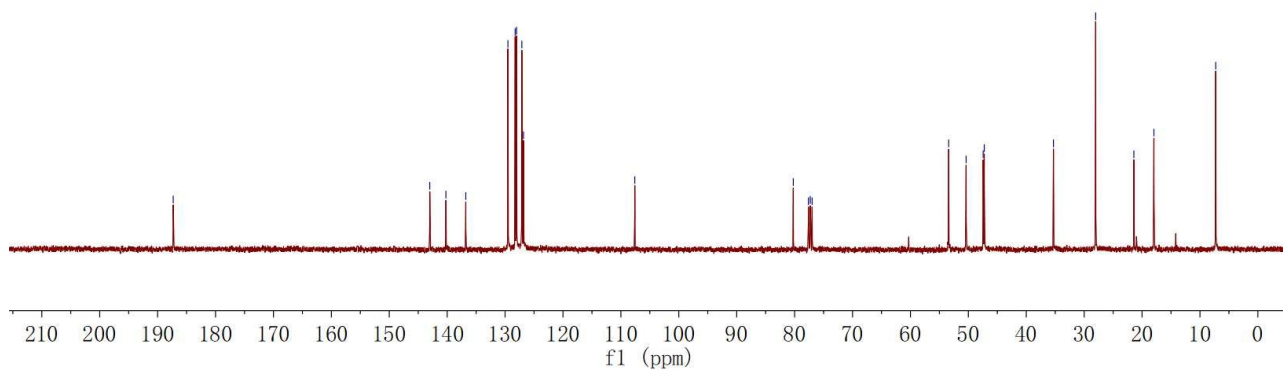

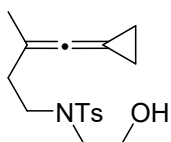

**Compound 1w:** Yield: 577.8 mg, 96%; A yellow oil; Eluent: PE/EA = 2/1;  $^1\text{H}$  NMR (400 MHz,  $\text{CDCl}_3$ , TMS)  $\delta$  7.70 (d,  $J = 7.9$  Hz, 2H), 7.31 (d,  $J = 8.0$  Hz, 2H), 3.78 – 3.74 (m, 2H), 3.28 (t,  $J = 7.6$  Hz, 2H), 3.23 (t,  $J = 5.4$  Hz, 2H), 2.43 (s, 3H), 2.39 (t,  $J = 5.6$  Hz, 1H), 2.27 (t,  $J = 7.6$  Hz, 2H), 1.75 (s, 3H), 1.43 (s, 4H);  $^{13}\text{C}$  NMR (100 MHz,  $\text{CDCl}_3$ , TMS)  $\delta$  186.9, 143.5, 135.9, 129.7, 127.3, 99.1, 77.9, 61.3, 51.0, 48.2, 33.6, 21.5, 19.7, 6.7; IR (neat):  $\nu$  3512, 2964, 1594, 1526, 1355, 1088, 989, 826, 829, 726  $\text{cm}^{-1}$ ; HRMS (ESI-TOF) Calcd for  $\text{C}_{17}\text{H}_{23}\text{NO}_3\text{NaS}$   $[\text{M}+\text{Na}]^+$ : 344.12909, found: 344.12938.

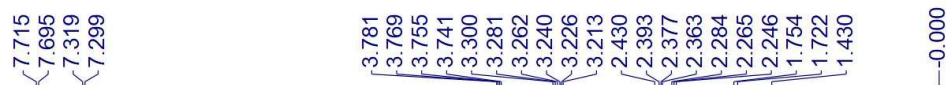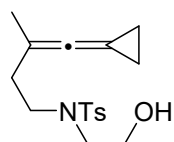

( $^1\text{H}$  NMR 400 MHz,  $\text{CDCl}_3$ )

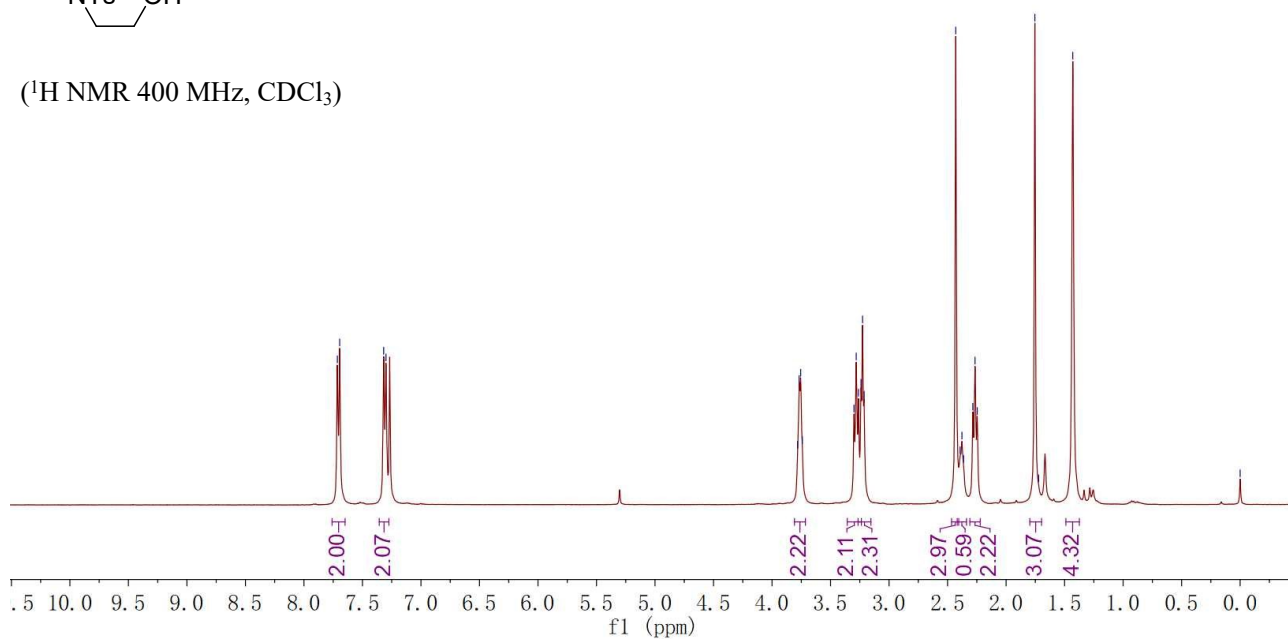

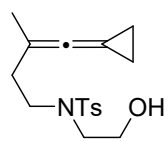

~186.867

~143.472  
~135.868  
~129.696  
~127.260

~99.070

77.872  
77.365  
77.047  
76.729

~61.336

~50.968  
~48.164

~33.574

~21.489  
~19.663

~6.693

(<sup>13</sup>C NMR 100 MHz, CDCl<sub>3</sub>)

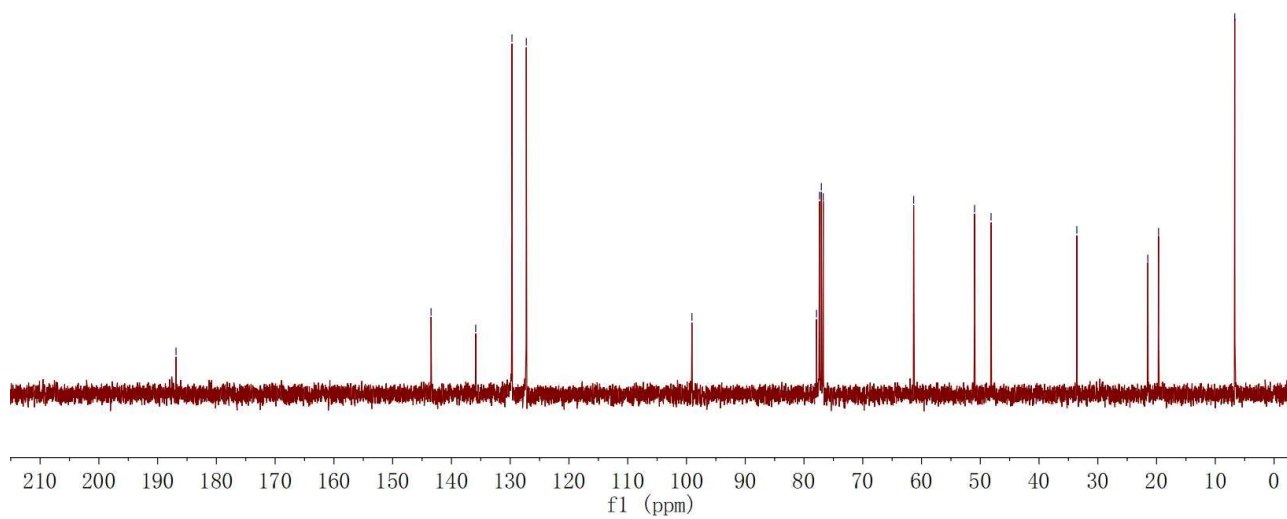

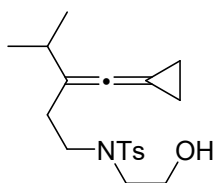

**Compound 1x:** Yield: 644.2 mg, 92%; A yellow oil; Eluent: PE/EA = 2/1;  $^1\text{H}$  NMR (400 MHz,  $\text{CDCl}_3$ , TMS)  $\delta$  7.73 – 7.66 (m, 2H), 7.30 (d,  $J = 8.0$  Hz, 2H), 3.77 – 3.74 (m, 2H), 3.30 – 3.21 (m, 4H), 2.40 – 2.47 (m, 1H), 2.42 (s, 3H), 2.33 – 2.22 (m, 2H), 2.15 (hept,  $J = 6.7$  Hz, 1H), 1.44 (s, 4H), 0.99 (d,  $J = 6.7$  Hz, 6H);  $^{13}\text{C}$  NMR (100 MHz,  $\text{CDCl}_3$ , TMS)  $\delta$  185.4, 143.5, 136.1, 129.7, 127.3, 110.4, 80.3, 61.3, 51.1, 48.8, 31.7, 30.3, 21.6, 21.5, 7.0; IR (neat):  $\nu$  3535, 2959, 2011, 1445, 1332, 1153, 966, 814, 731  $\text{cm}^{-1}$ ; HRMS (ESI-TOF) Calcd for  $\text{C}_{19}\text{H}_{27}\text{NO}_3\text{NaS}$   $[\text{M}+\text{Na}]^+$ : 372.16039, found: 372.15969.

7.709  
7.705  
7.694  
7.689  
7.313  
7.293

3.773  
3.760  
3.748  
3.735  
3.278  
3.260  
3.247  
3.239  
3.233  
2.500  
2.486  
2.471  
2.423  
2.288  
2.274  
2.268  
2.263  
2.249  
2.200  
2.183  
2.166  
2.149  
2.133  
2.116  
2.099  
1.436  
1.003  
0.986  
-0.000

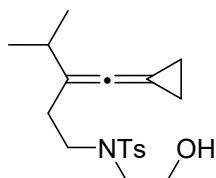

( $^1\text{H}$  NMR 400 MHz,  $\text{CDCl}_3$ )

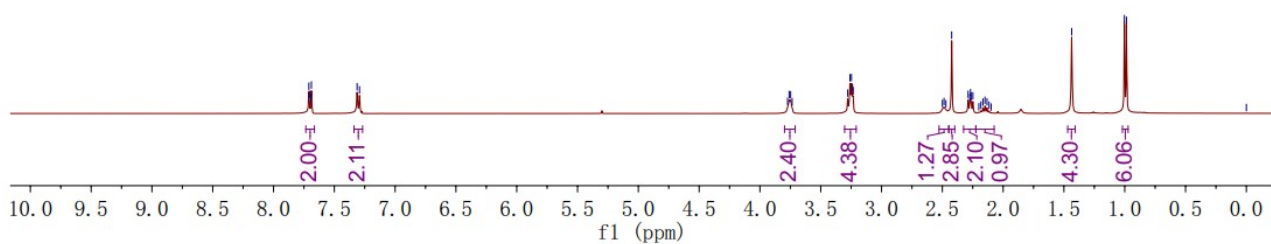



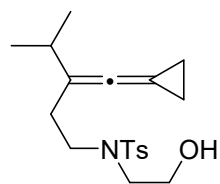

-185.377

-143.465  
-136.147  
-129.723  
-127.278

-110.433

80.278  
77.393  
77.075  
76.758

-61.340

51.067  
48.752

31.744  
30.317  
21.601  
21.511

-6.961

(<sup>13</sup>C NMR 100 MHz, CDCl<sub>3</sub>)

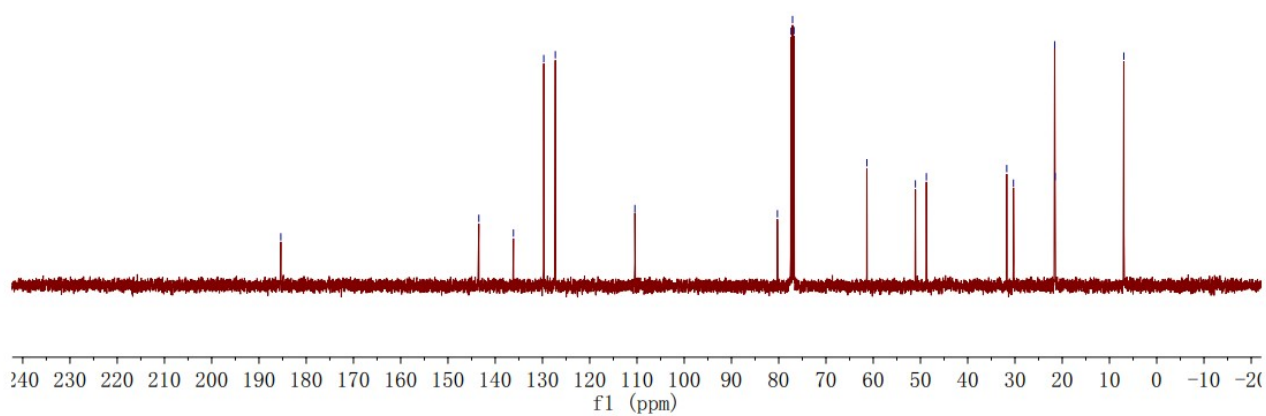

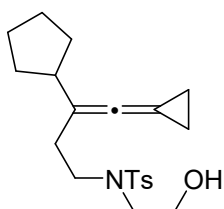

**Compound 1y:** Yield: 697.5 mg, 93%; A colorless oil; Eluent: PE/EA = 2/1;  $^1\text{H}$  NMR (400 MHz,  $\text{CDCl}_3$ , TMS)  $\delta$  7.74 – 7.67 (m, 2H), 7.30 (d,  $J$  = 8.0 Hz, 2H), 3.78 – 3.74 (m, 2H), 3.32 – 3.21 (m, 4H), 2.43 (s, 3H), 2.38 – 2.32 (m, 1H), 2.29 – 2.25 (m, 2H), 1.79 – 1.73 (m, 3H), 1.65 – 1.48 (m, 4H), 1.43 (s, 4H), 1.40 – 1.29 (m, 1H);  $^{13}\text{C}$  NMR (100 MHz,  $\text{CDCl}_3$ , TMS)  $\delta$  185.2, 143.5, 136.1, 129.7, 127.3, 108.3, 80.0, 61.4, 51.0, 48.7, 43.1, 31.6, 31.4, 24.9, 21.5, 6.9; IR (neat):  $\nu$  3525, 2949, 2014, 1591, 1332, 1108, 970, 813, 736, 659  $\text{cm}^{-1}$ ; HRMS (ESI-TOF) Calcd for  $\text{C}_{21}\text{H}_{29}\text{NO}_3\text{NaS}$   $[\text{M}+\text{Na}]^+$ : 398.17604, found: 398.17607.

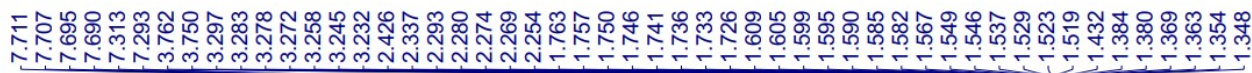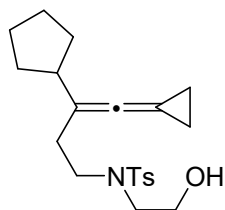

( $^1\text{H}$  NMR 400 MHz,  $\text{CDCl}_3$ )

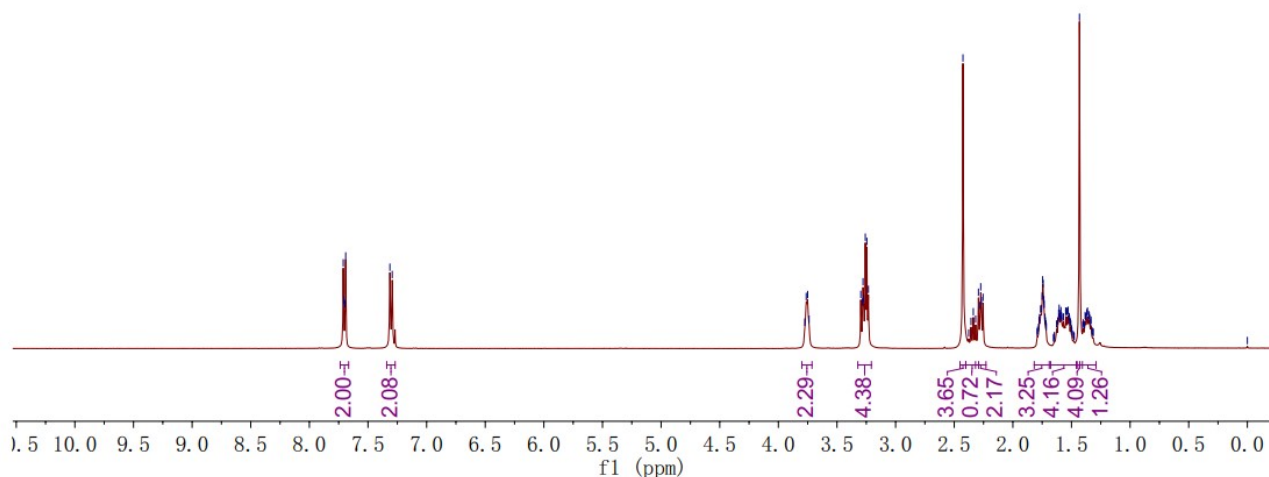

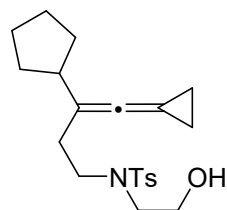

185.214  
143.466  
136.137  
129.719  
127.308  
108.330  
80.014  
77.371  
77.053  
76.736  
61.360  
51.033  
48.651  
43.114  
31.635  
31.385  
24.943  
21.522  
6.894

(<sup>13</sup>C NMR 100 MHz, CDCl<sub>3</sub>)

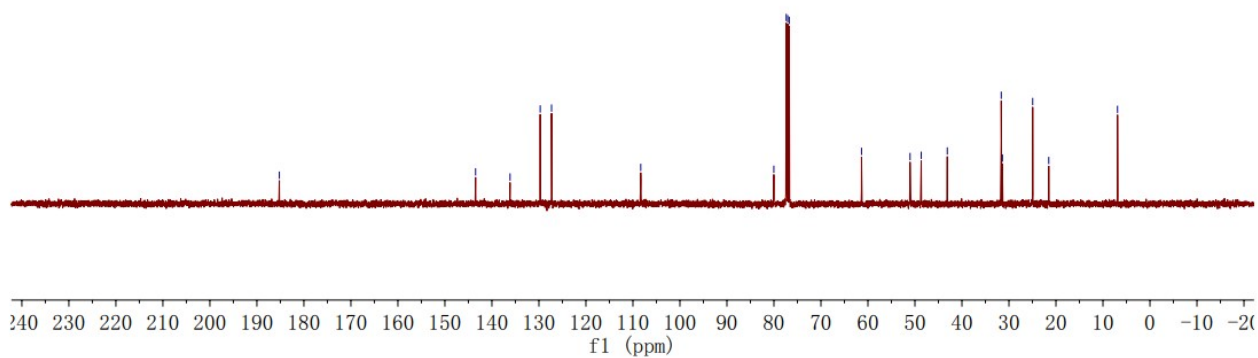

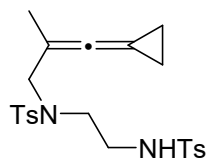

**Compound 1z:** Yield: 901.6 mg, 98%; A yellow oil; Eluent: PE/EA = 4/1;  $^1\text{H}$  NMR (400 MHz,  $\text{CDCl}_3$ , TMS)  $\delta$  7.79 – 7.73 (m, 2H), 7.65 – 7.60 (m, 2H), 7.34 – 7.26 (m, 4H), 5.15 – 5.13 (m, 1H), 3.67 (s, 2H), 3.18 – 3.10 (m, 4H), 2.44 (s, 3H), 2.42 (s, 3H), 1.60 (s, 3H), 1.48 – 1.35 (m, 4H);  $^{13}\text{C}$  NMR (100 MHz,  $\text{CDCl}_3$ , TMS)  $\delta$  188.6, 143.7, 143.4, 136.8, 135.7, 129.8, 129.7, 127.25, 127.21, 97.4, 78.2, 54.1, 47.7, 42.2, 21.54, 21.52, 16.9, 7.3; IR (neat):  $\nu$  3287, 2900, 2026, 1585, 1337, 1080, 1001, 816, 763, 655  $\text{cm}^{-1}$ ; HRMS (ESI-TOF) Calcd for  $\text{C}_{23}\text{H}_{28}\text{N}_2\text{O}_4\text{NaS}$   $[\text{M}+\text{Na}]^+$ : 483.13827, found: 483.13815.

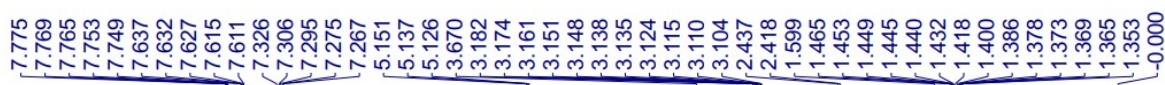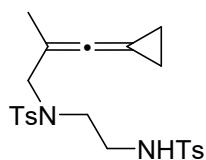

( $^1\text{H}$  NMR 400 MHz,  $\text{CDCl}_3$ )

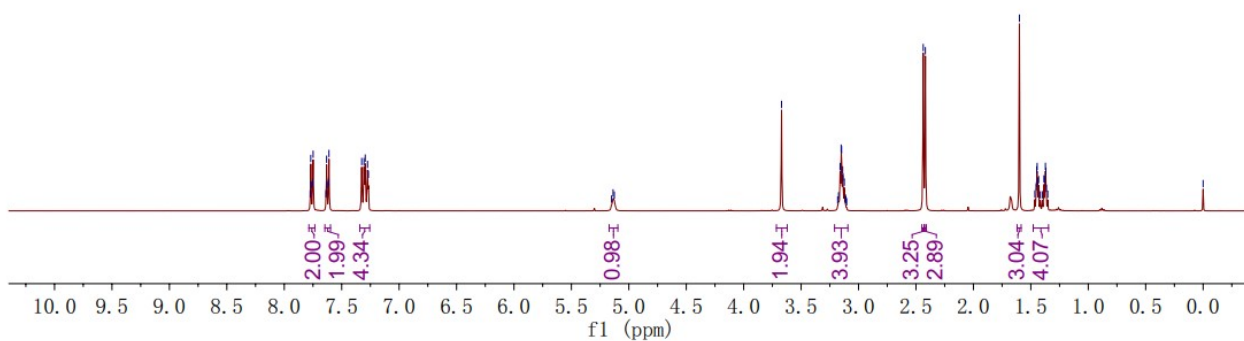

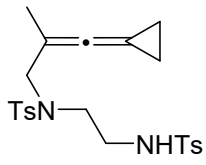

-188.628

143.685  
143.419  
136.810  
135.707  
129.787  
129.713  
127.249  
127.212

-97.364

78.226  
77.261  
77.049  
76.838

54.060  
47.663  
42.211

21.536  
21.519  
16.867  
-7.269

(<sup>13</sup>C NMR 100 MHz, CDCl<sub>3</sub>)

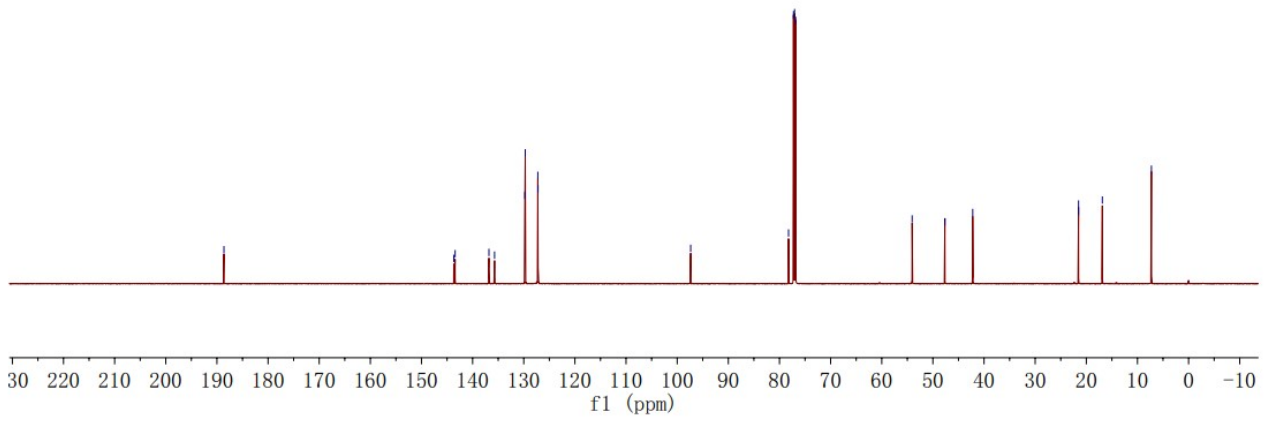

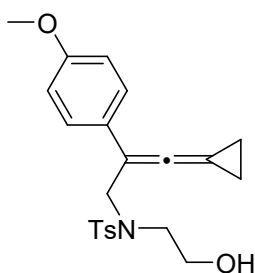

**Compound 1aa:** Yield: 95.8 mg, 12%; A colorless solid; Mp: 196 – 198 °C; Eluent: PE/EA = 1/1; <sup>1</sup>H NMR (400 MHz, CDCl<sub>3</sub>, TMS) δ 7.72 (d, *J* = 7.9 Hz, 2H), 7.39 (d, *J* = 8.6 Hz, 2H), 7.31 (d, *J* = 7.9 Hz, 2H), 6.86 (d, *J* = 8.6 Hz, 2H), 4.26 (s, 2H), 3.80 (s, 3H), 3.61 (t, *J* = 5.2 Hz, 2H), 3.22 (t, *J* = 5.2 Hz, 2H), 2.43 (s, 3H), 1.71 – 1.50 (m, 4H); <sup>13</sup>C NMR (100 MHz, CDCl<sub>3</sub>, TMS) δ 189.9, 158.7, 143.6, 135.3, 129.7, 127.5, 127.4, 127.3, 114.1, 103.0, 80.5, 61.2, 55.3, 51.3, 50.2, 21.5, 8.5; IR (neat): ν 3663, 2979, 2001, 1599, 1516, 1323, 1247, 1069, 827, 709, 756, 712 cm<sup>-1</sup>; HRMS (ESI-TOF) Calcd for C<sub>22</sub>H<sub>25</sub>NO<sub>4</sub>NaS [M+Na]<sup>+</sup>: 422.13965, found: 422.14017.

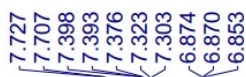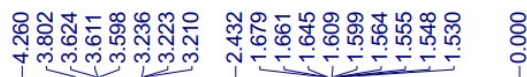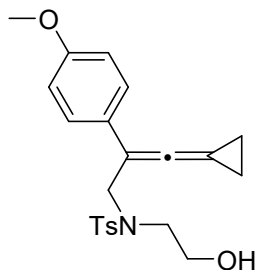

(<sup>1</sup>H NMR 400 MHz, CDCl<sub>3</sub>)

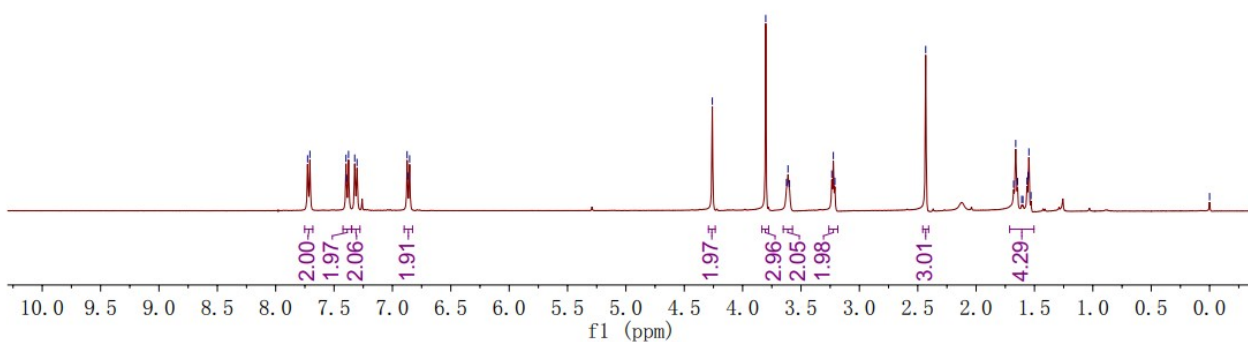

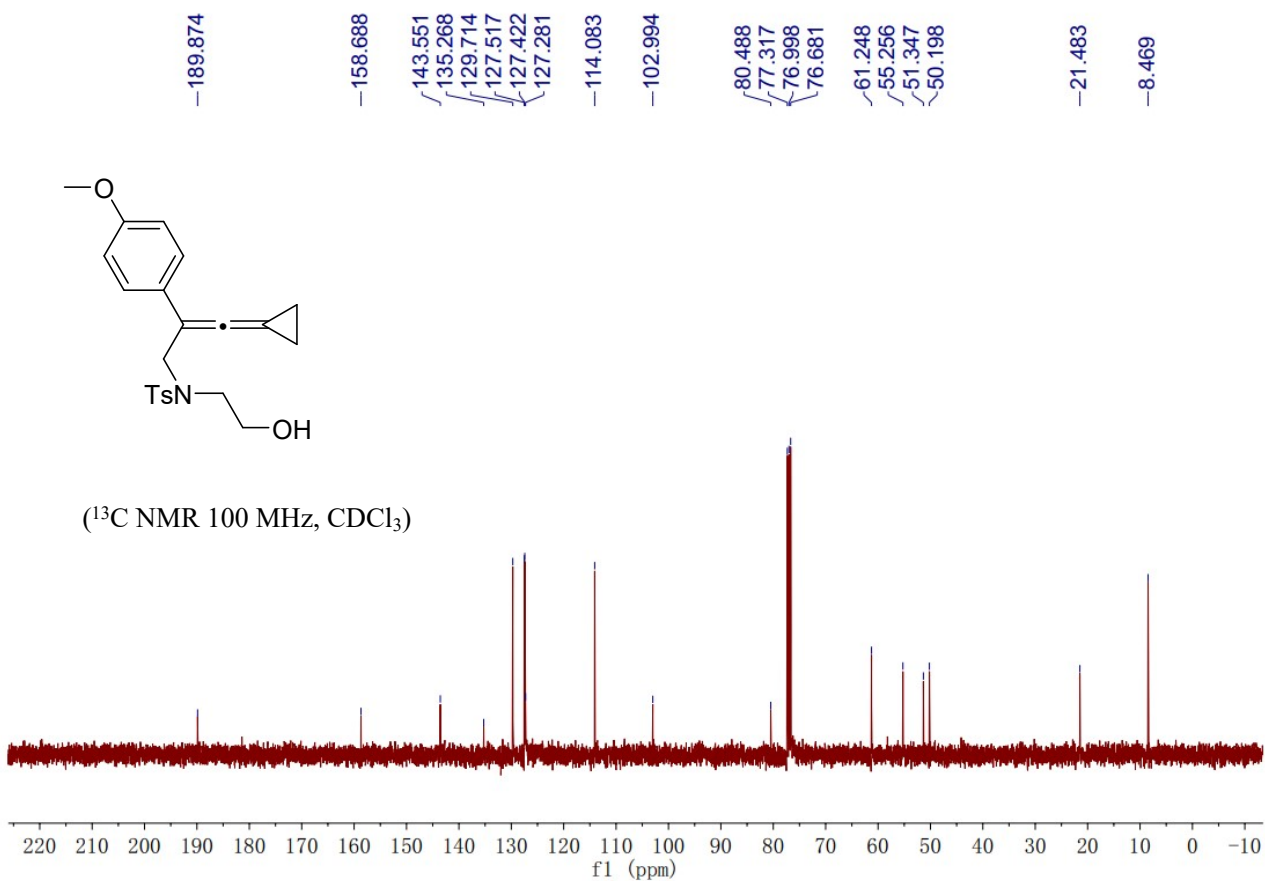

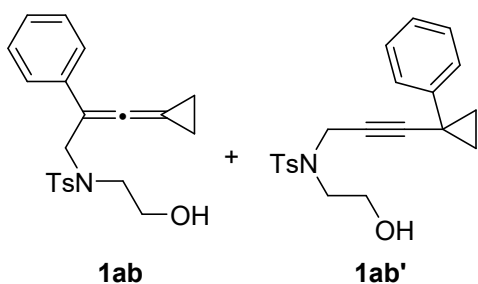

**Compound 1ab**: An inseparable mixture of **1ab** and **1ab'** in a 1:0.93 ratio determined by  $^1\text{H}$  NMR analysis; a yellow oil; Eluent: PE/EA = 2/1;  $^1\text{H}$  NMR (400 MHz,  $\text{CDCl}_3$ , TMS, detectable signals of **1ab** are marked with an asterisk)  $\delta$  7.78 – 7.68 (m, 2H), 7.47 – 7.45 (m, 1H), 7.34 – 7.30 (m, 2H), 7.28 – 7.12 (m, 3H), 7.10 – 7.07 (m, 1H), 4.29\* (s, 1H), 4.25 (s, 1H), 3.79 – 3.77 (m, 1H), 3.61 – 3.59\* (m, 1H), 3.35 (t,  $J = 5.2$  Hz, 1H), 3.23\* (t,  $J = 5.4$  Hz, 1H), 2.43\* (s, 2H), 2.33 (s, 1H), 1.77 – 1.51\* (m, 2H), 1.14 – 1.04 (m, 2H);  $^{13}\text{C}$  NMR (100 MHz,  $\text{CDCl}_3$ , TMS)  $\delta$  190.4, 143.7, 143.6, 141.1, 135.6, 135.2, 129.8, 129.6, 128.6, 128.3, 127.7, 127.5, 126.9, 126.2, 126.1, 125.3, 103.3, 90.0, 80.6, 70.5, 61.1, 60.4, 51.0, 50.1, 48.8, 38.3, 21.55, 21.49, 19.8, 15.4, 8.8.

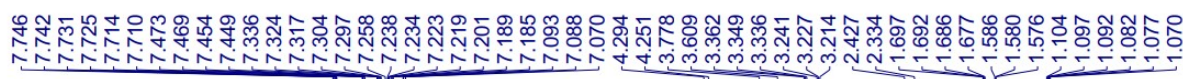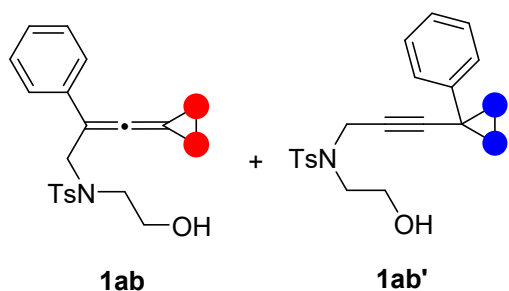

( $^1\text{H}$  NMR 400 MHz,  $\text{CDCl}_3$ )

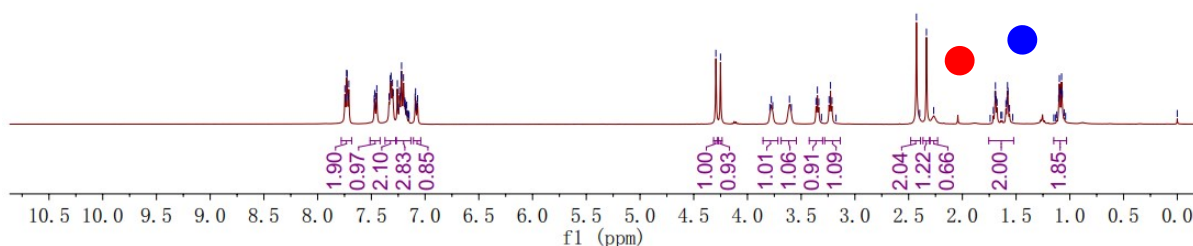



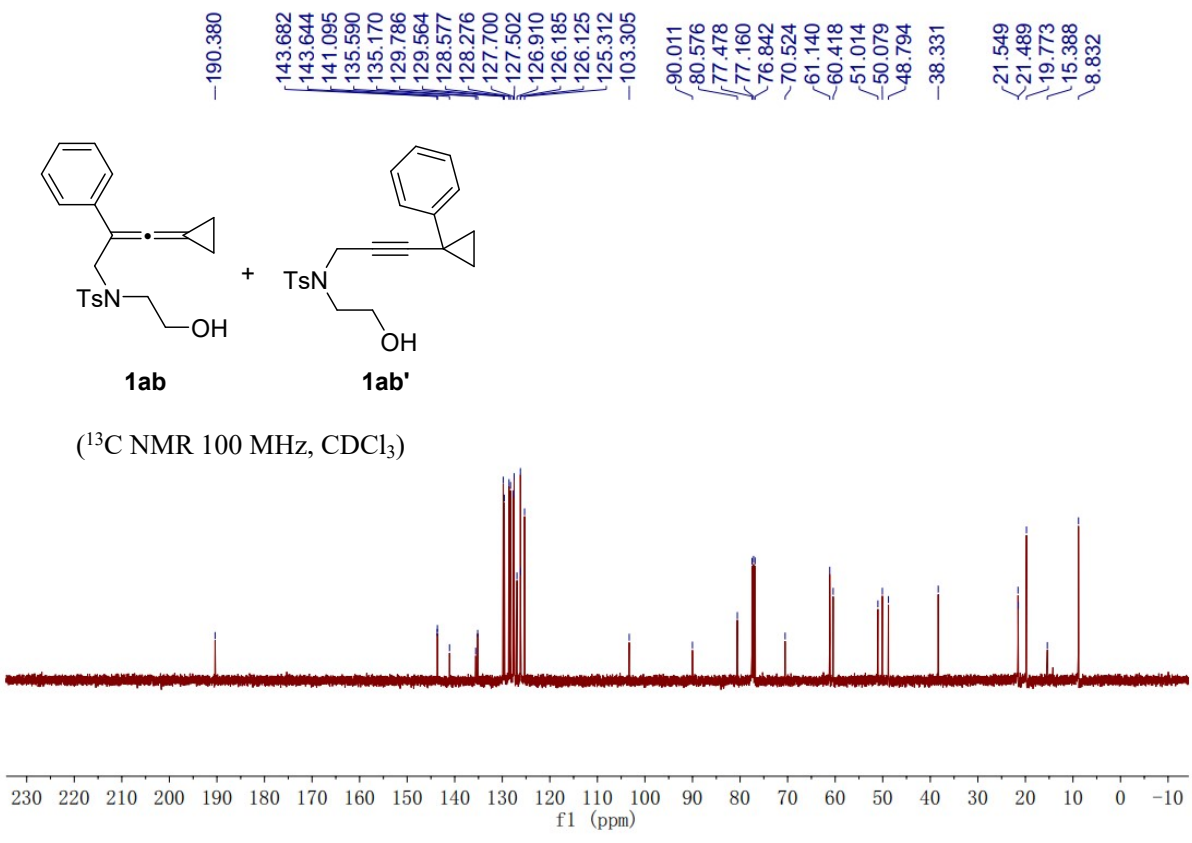

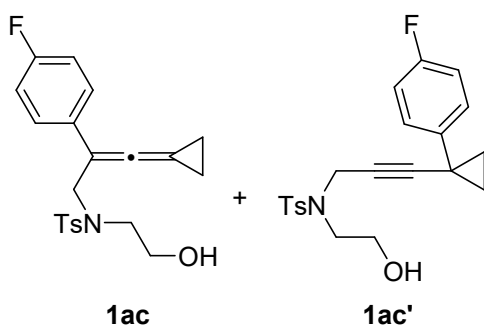

**Compound 1ac:** An inseparable mixture of **1ac** and **1ac'** in a 1:1.04 ratio determined by  $^1\text{H}$  NMR analysis; a yellow oil; Eluent: PE/EA = 2/1;  $^1\text{H}$  NMR (400 MHz,  $\text{CDCl}_3$ , TMS, detectable signals of **1ac** are marked with an asterisk)  $\delta$  7.77 – 7.69 (m, 2H), 7.49 – 7.40 (m, 1H), 7.33 (d,  $J = 8.0$  Hz, 1H), 7.23 (d,  $J = 8.0$  Hz, 1H), 7.10 – 6.97 (m, 2H), 6.95 – 6.89 (m, 1H), 4.25\* (s, 1H), 4.24 (s, 1H), 3.78\* (t,  $J = 5.2$  Hz, 1H), 3.60 (t,  $J = 5.4$  Hz, 1H), 3.34\* (t,  $J = 5.2$  Hz, 1H), 3.21 (t,  $J = 5.4$  Hz, 1H), 2.44\* (s, 2H), 2.36 (s, 1H), 1.80 – 1.51\* (m, 2H), 1.10 – 1.03 (m, 2H);  $^{13}\text{C}$  NMR (100 MHz,  $\text{CDCl}_3$ , TMS)  $\delta$  190.2, 163.0, 162.5, 160.5, 143.8, 143.7, 136.9, 135.6, 134.9, 131.1, 129.8, 129.5, 127.9, 127.8, 127.7, 127.5, 127.2, 127.1, 115.6, 115.4, 115.1, 114.9, 110.0, 102.3, 89.8, 80.7, 70.5, 61.2, 60.4, 51.4, 50.1, 48.8, 38.3, 21.54, 21.48, 19.4, 14.9, 8.8;  $^{19}\text{F}$  NMR (376 MHz,  $\text{CDCl}_3$ )  $\delta$  -115.4, -116.8.

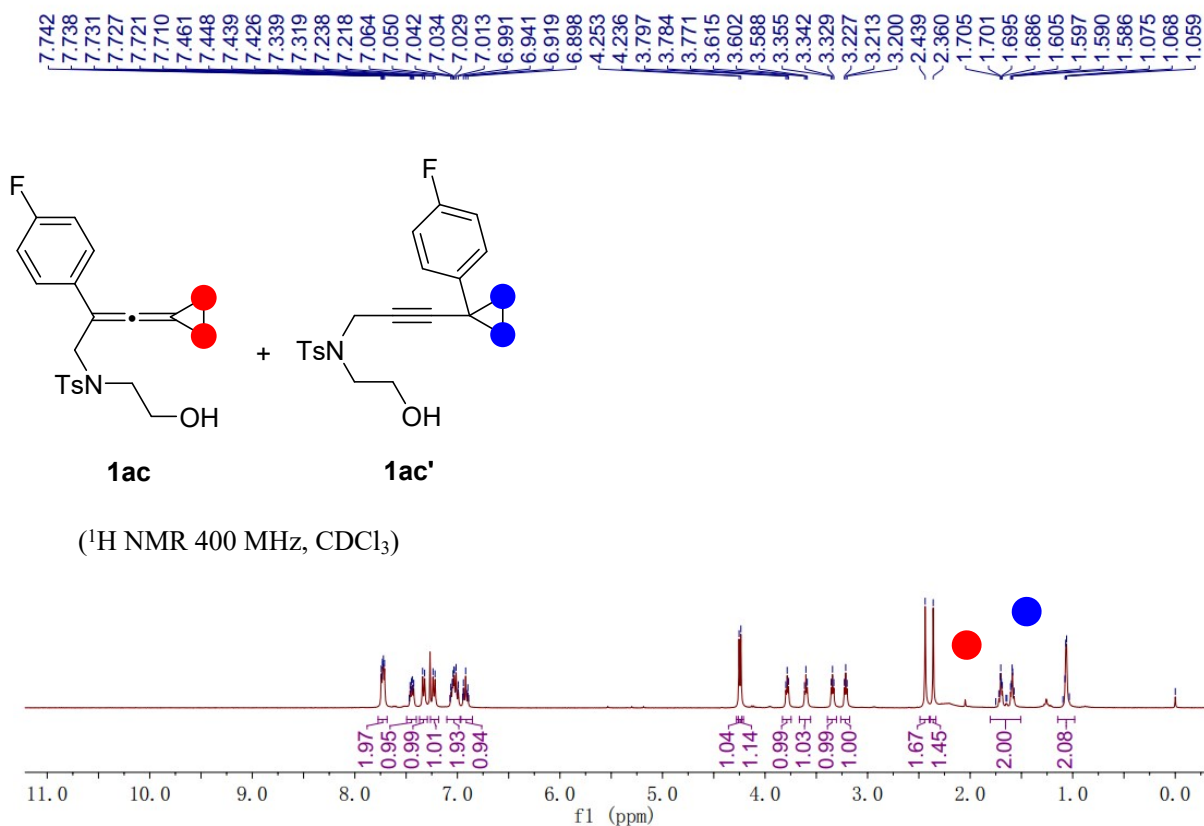

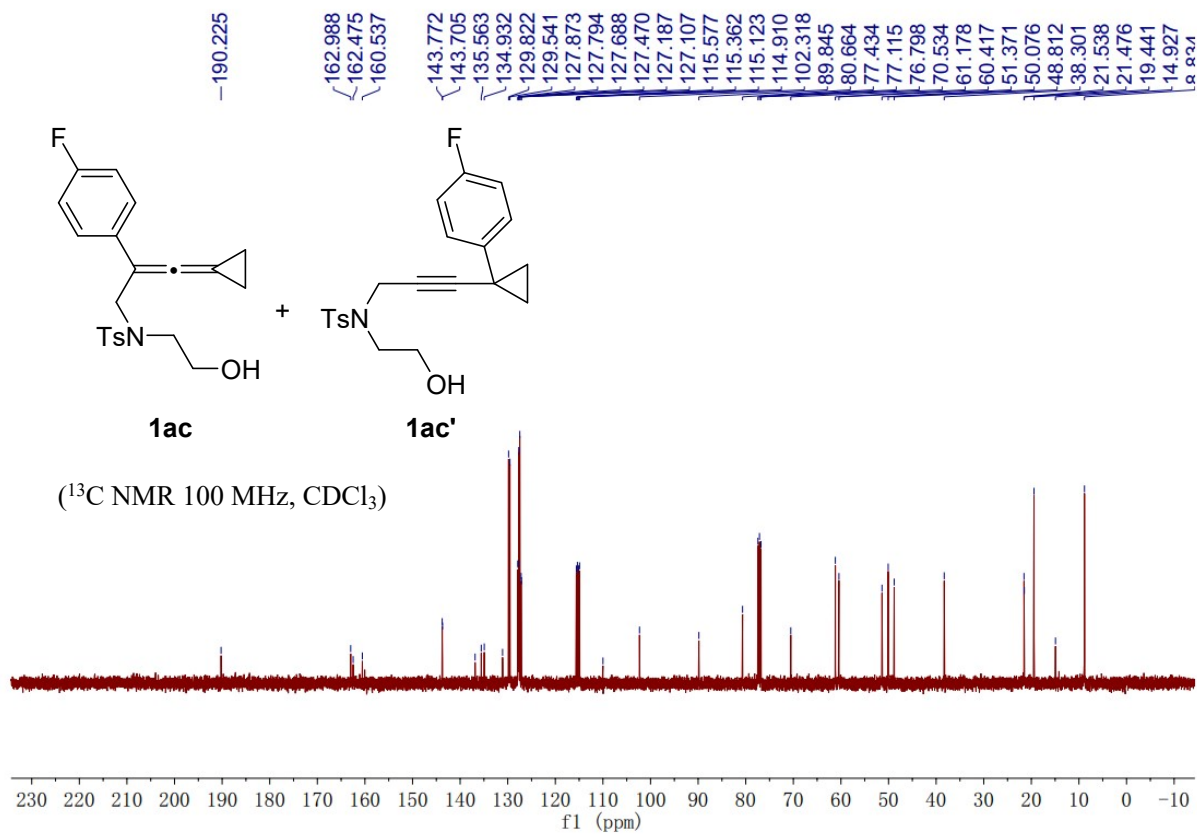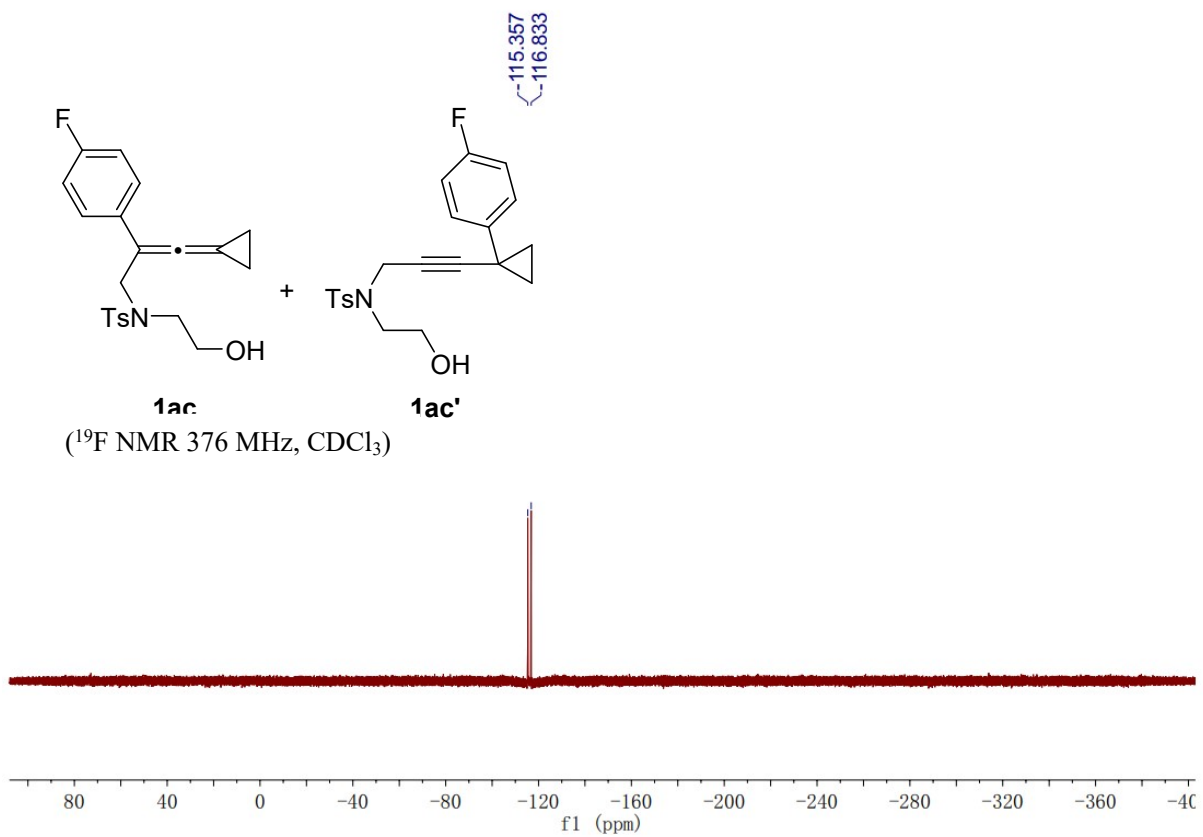

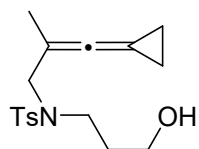

**Compound 1ad:** Yield: 500.8 mg, 78%; A yellow oil; Eluent: PE/EA = 1/1;  $^1\text{H}$  NMR (400 MHz,  $\text{CDCl}_3$ , TMS)  $\delta$  7.72 – 7.67 (m, 2H), 7.29 (d,  $J$  = 8.0 Hz, 2H), 3.79 (s, 2H), 3.74 – 3.70 (m, 2H), 3.27 (t,  $J$  = 6.6 Hz, 2H), 2.47 – 2.43 (m, 1H), 2.42 (s, 3H), 1.79 – 1.73 (m, 2H), 1.70 (s, 3H), 1.48 – 1.33 (m, 4H);  $^{13}\text{C}$  NMR (100 MHz,  $\text{CDCl}_3$ , TMS)  $\delta$  188.7, 143.3, 136.6, 129.7, 127.1, 97.6, 77.6, 59.0, 53.4, 44.6, 31.0, 21.5, 17.1, 7.0; IR (neat):  $\nu$  3530, 2917, 2027, 1589, 1320, 1036, 973, 806, 733, 691  $\text{cm}^{-1}$ ; HRMS (ESI-TOF) Calcd for  $\text{C}_{17}\text{H}_{23}\text{NO}_3\text{NaS}$   $[\text{M}+\text{Na}]^+$ : 344.12909, found: 344.12857.

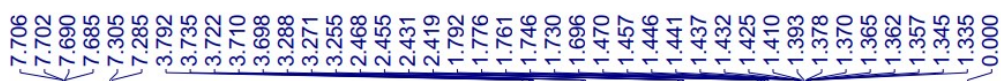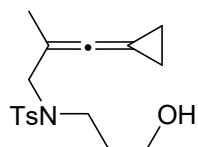

( $^1\text{H}$  NMR 400 MHz,  $\text{CDCl}_3$ )

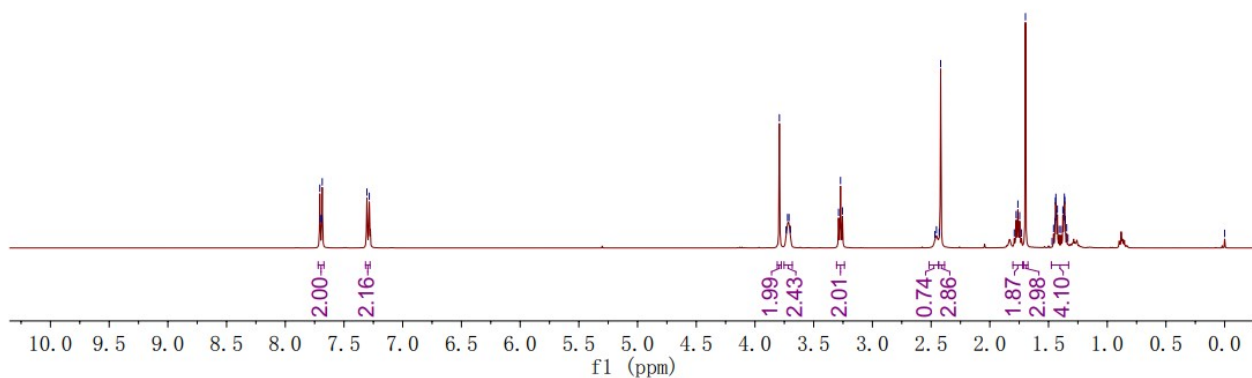

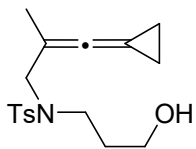

-188.713

~143.286  
~136.580  
~129.676  
~127.134

-97.605

{77.630  
77.281  
77.070  
76.859

~59.042  
~53.399  
~44.596

-30.969

-21.501  
-17.107

-7.014

(<sup>13</sup>C NMR 100 MHz, CDCl<sub>3</sub>)

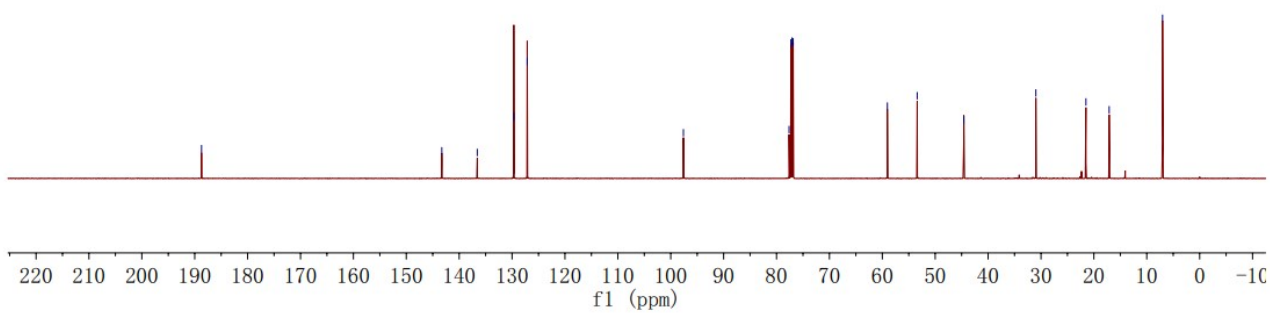

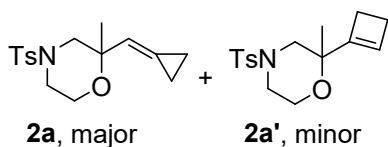

**Compound 2a:** An inseparable mixture of **2a** and **2a'** in a 21:1 ratio determined by  $^1\text{H}$  NMR analysis; Yield: 53.4 mg, 87%; A colorless solid; Mp: 89 – 92 °C; Eluent: PE/EA = 10/1;  $^1\text{H}$  NMR (400 MHz,  $\text{CDCl}_3$ , TMS)  $\delta$  7.63 (d,  $J = 8.0$  Hz, 2H), 7.35 (d,  $J = 8.0$  Hz, 2H), 5.84 (s, 1H), 3.88 – 3.82 (m, 1H), 3.76 – 3.71 (m, 1H), 3.53 (d,  $J = 11.2$  Hz, 1H), 3.20 – 3.15 (m, 1H), 2.63 – 2.56 (m, 1H), 2.50 – 2.47 (m, 1H), 2.45 (s, 3H), 1.42 – 1.35 (m, 1H), 1.31 (s, 3H), 1.27 – 1.17 (m, 1H), 1.12 – 0.97 (m, 2H);  $^{13}\text{C}$  NMR (101 MHz,  $\text{CDCl}_3$ )  $\delta$  142.8, 131.0, 128.7, 126.9, 123.8, 119.4, 73.5, 59.9, 52.0, 44.6, 24.2, 20.5, 2.9, 0.0; IR (neat):  $\nu$  2965, 2847, 2357, 1597, 1453, 1353, 1161, 1128, 990, 947, 864, 771, 656  $\text{cm}^{-1}$ ; HRMS (ESI-TOF) Calcd for  $\text{C}_{16}\text{H}_{21}\text{NO}_3\text{NaS} [\text{M}+\text{Na}]^+$ : 330.11344, found: 330.11408; Enantiomeric excess was determined by HPLC with a Chiralpak IC column [ $\lambda = 254$  nm; eluent: Hexane/Isopropanol = 90/10; Flow rate: 1.0 mL/min;  $t_{\text{minor}} = 16.55$  min,  $t_{\text{major}} = 18.38$  min; ee% = 55%].

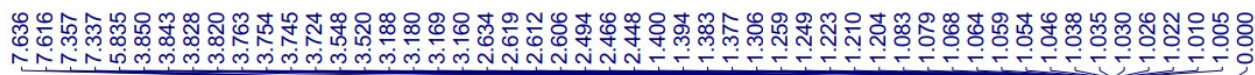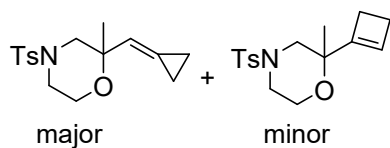

( $^1\text{H}$  NMR 400 MHz,  $\text{CDCl}_3$ )

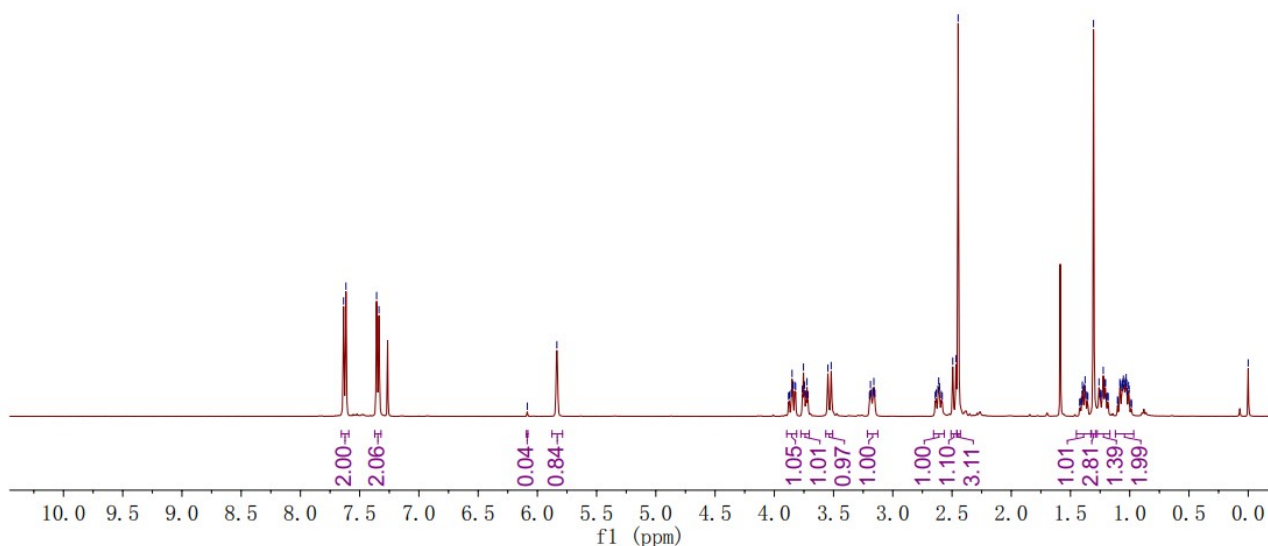

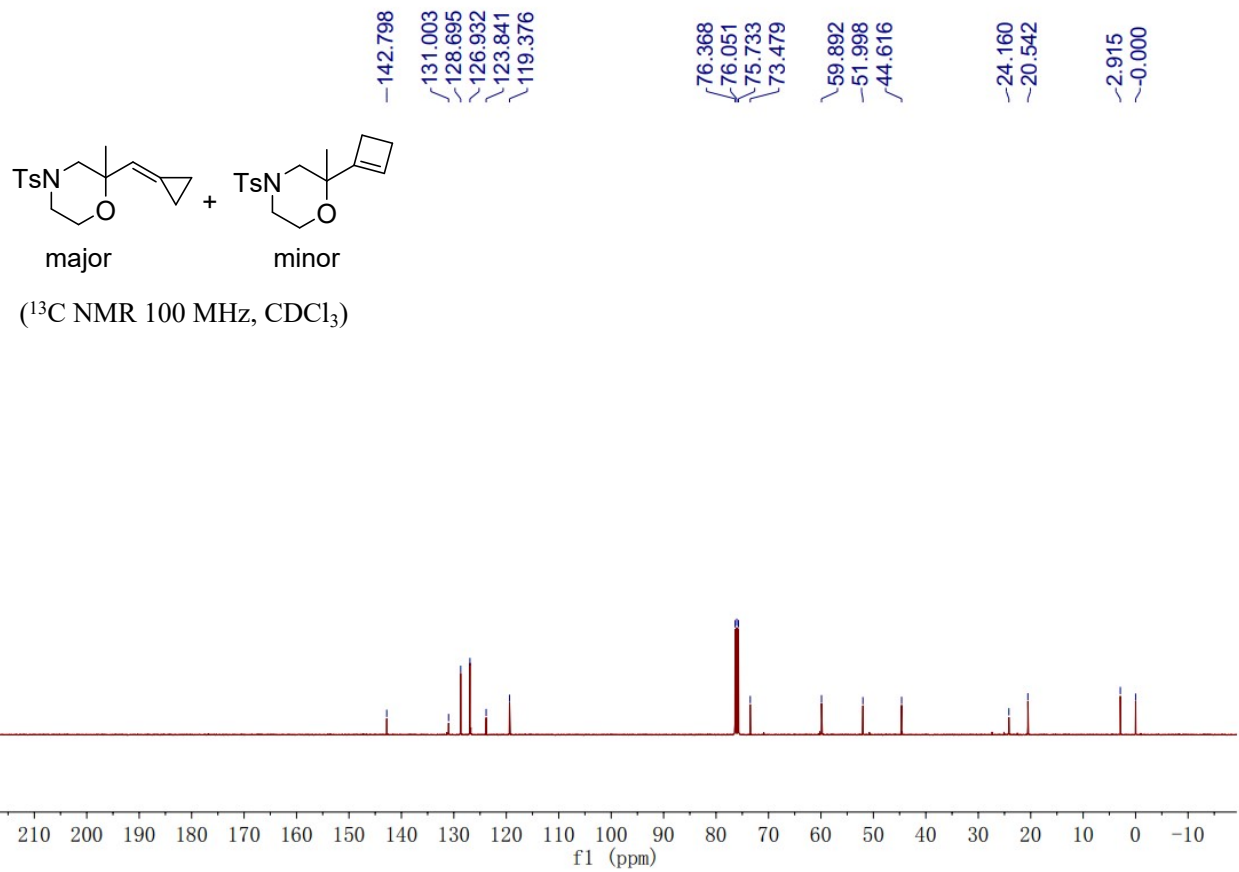

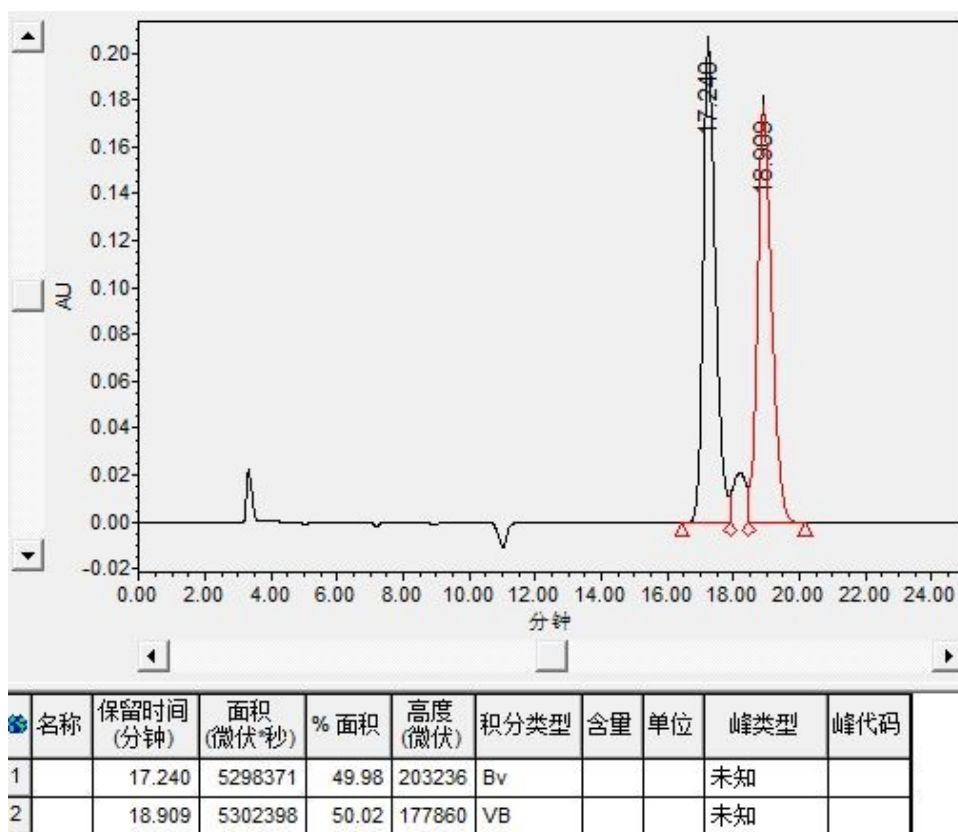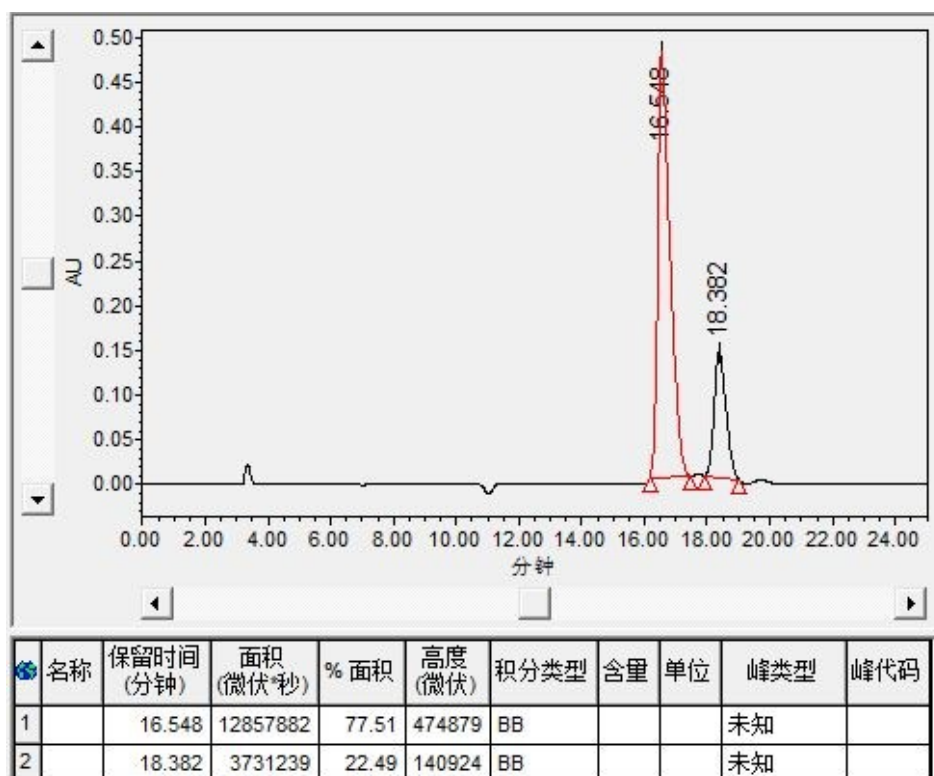

Translation: Enantiomeric excess was determined by HPLC with a Chiralpak IC column [ $\lambda = 254$  nm; eluent: Hexane/Isopropanol = 90/10; Flow rate: 1.0 mL/min;  $t_{minor} = 16.55$  min,  $t_{major} = 18.38$  min; ee% = 55%].



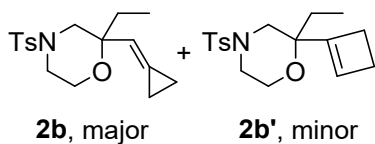

**Compound 2b:** An inseparable mixture of **2b** and **2b'** in a 10:1 ratio determined by  $^1\text{H}$  NMR analysis; Yield: 52.3 mg, 81%; a yellow oil; Eluent: PE/EA = 10/1;  $^1\text{H}$  NMR (400 MHz,  $\text{CDCl}_3$ , TMS)  $\delta$  7.65 – 7.58 (m, 2H), 7.35 (d,  $J = 8.0$  Hz, 2H), 5.70 (s, 1H), 3.88 – 3.82 (m, 1H), 3.73 – 3.68 (m, 1H), 3.63 (d,  $J = 11.2$  Hz, 1H), 3.21 – 3.17 (m, 1H), 2.60 – 2.53 (m, 1H), 2.45 (s, 3H), 2.43 – 2.39 (m, 1H), 1.80 – 1.66 (m, 1H), 1.59 – 1.50 (m, 1H), 1.46 – 1.39 (m, 1H), 1.28 – 1.15 (m, 1H), 1.12 – 1.01 (m, 2H), 0.81 (t,  $J = 7.5$  Hz, 3H);  $^{13}\text{C}$  NMR (101 MHz,  $\text{CDCl}_3$ )  $\delta$  142.6, 130.7, 128.5, 126.7, 124.5, 117.9, 73.8, 59.6, 50.4, 44.6, 30.2, 20.3, 6.2, 2.9, 0.0; IR (neat):  $\nu$  2955, 2870, 2846, 2026, 1995, 1450, 1350, 1163, 1086, 976, 899, 815, 799, 734, 656  $\text{cm}^{-1}$ ; HRMS (ESI-TOF) Calcd for  $\text{C}_{17}\text{H}_{23}\text{NO}_3\text{NaS} [\text{M}+\text{Na}]^+$ : 344.12909, found: 344.13002.

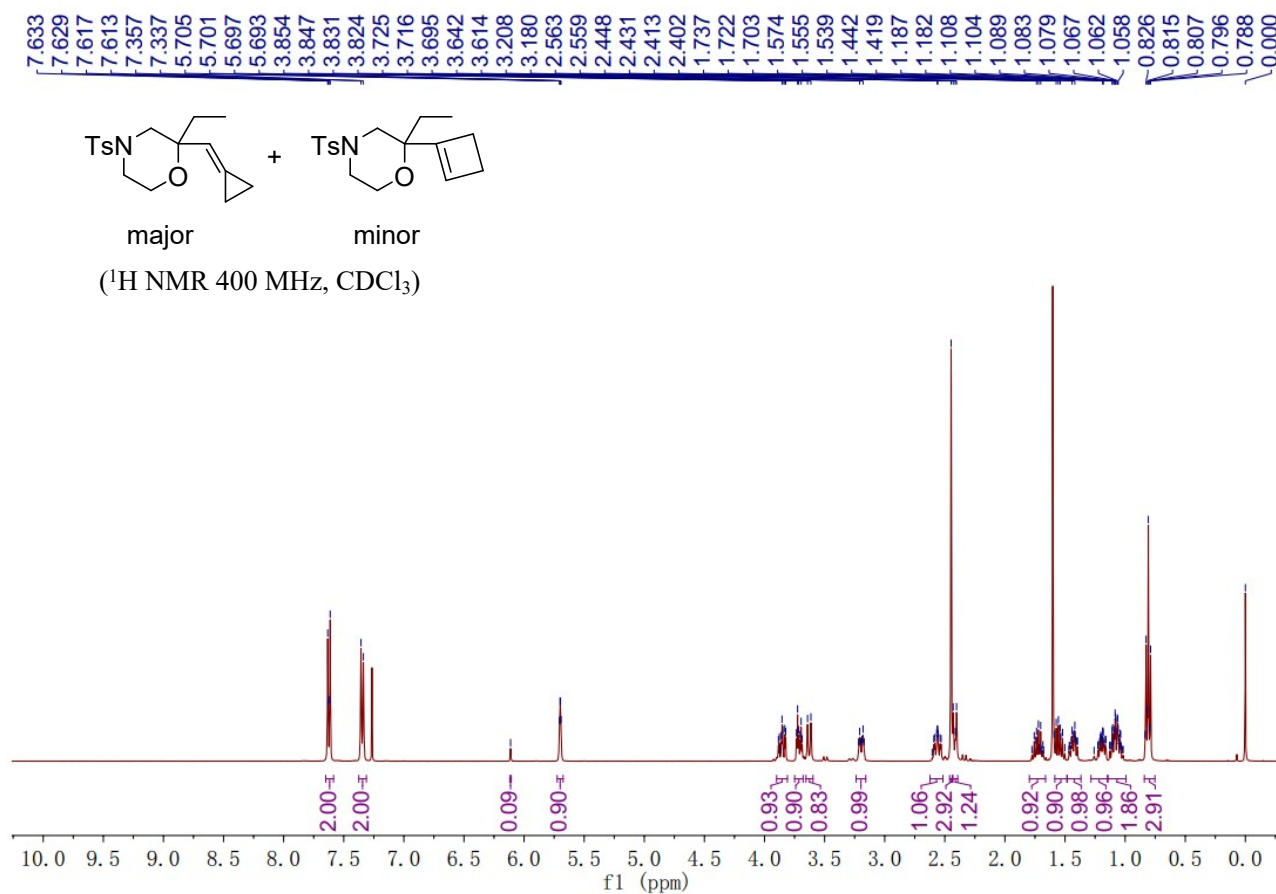

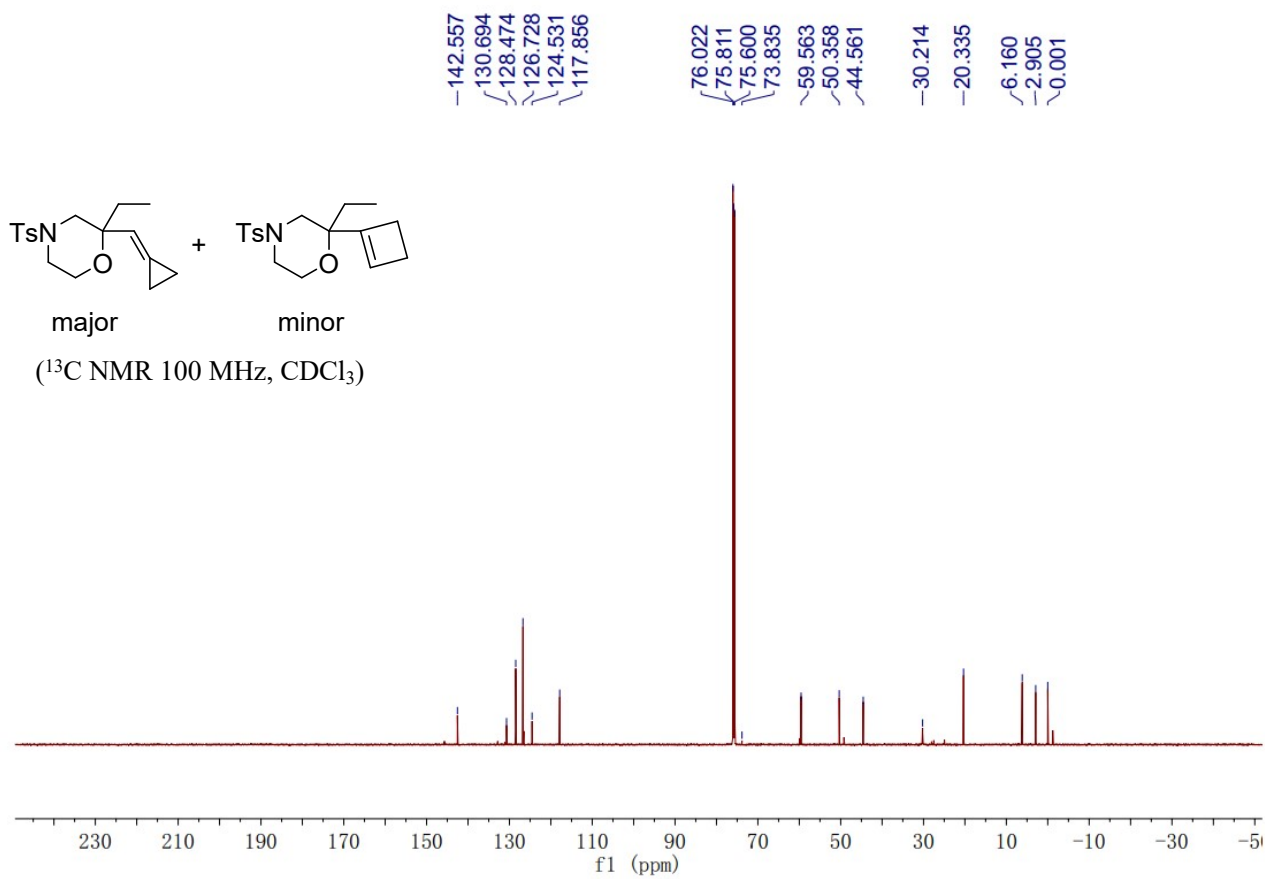

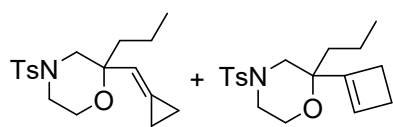

**2c**, major

**2c'**, minor

**Compound 2c:** An inseparable mixture of **2c** and **2c'** in a 6:1 ratio determined by  $^1\text{H}$  NMR analysis; Yield: 56.3 mg, 84%; a yellow oil; Eluent: PE/EA = 10/1;  $^1\text{H}$  NMR (400 MHz,  $\text{CDCl}_3$ , TMS)  $\delta$  7.66 – 7.58 (m, 2H), 7.35 (d,  $J = 8.2$  Hz, 2H), 5.76 – 5.66 (m, 1H), 3.87 – 3.81 (m, 1H), 3.72 – 3.67 (m, 1H), 3.62 (d,  $J = 11.2$  Hz, 1H), 3.21 – 3.16 (m, 1H), 2.61 – 2.52 (m, 1H), 2.44 (s, 3H), 2.41 – 2.38 (m, 1H), 1.69 – 1.60 (m, 1H), 1.55 – 1.37 (m, 2H), 1.33 – 1.13 (m, 3H), 1.11 – 1.10 (m, 2H), 0.86 (t,  $J = 7.3$  Hz, 3H);  $^{13}\text{C}$  NMR (101 MHz,  $\text{CDCl}_3$ )  $\delta$  142.6, 130.7, 128.5, 126.8, 124.2, 118.3, 75.8, 73.5, 59.6, 50.7, 44.6, 20.4, 15.1, 13.3, 2.9, 0.0; IR (neat):  $\nu$  2958, 2871, 1597, 1454, 1359, 1305, 1261, 1278, 1165, 1088, 980, 966, 916, 815, 802, 751, 661  $\text{cm}^{-1}$ ; HRMS (ESI-TOF) Calcd for  $\text{C}_{18}\text{H}_{25}\text{NO}_3\text{NaS}$   $[\text{M}+\text{Na}]^+$ : 358.14474, found: 358.14474.

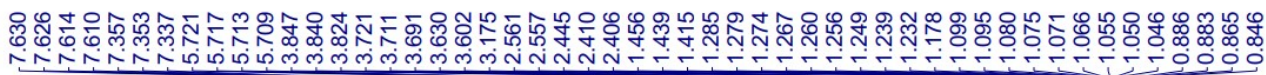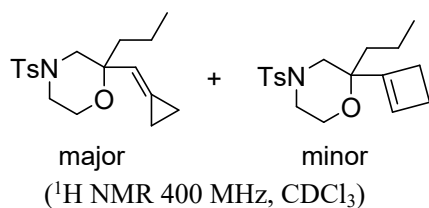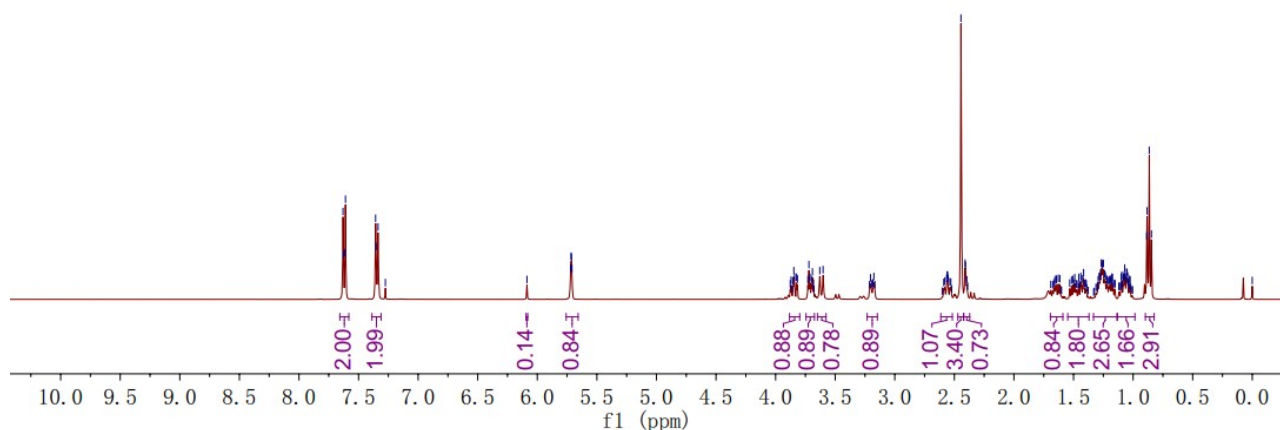

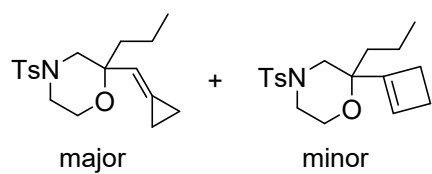

(<sup>13</sup>C NMR 100 MHz, CDCl<sub>3</sub>)

~142.579  
 ~130.709  
 ~128.497  
 ~126.752  
 ~124.231  
 ~118.312

~76.073  
 ~75.861  
 ~75.760  
 ~75.650  
 ~73.517  
 ~59.553  
 ~50.683  
 ~44.598

~20.358  
 ~15.063  
 ~13.297  
 ~2.910  
 ~0.003

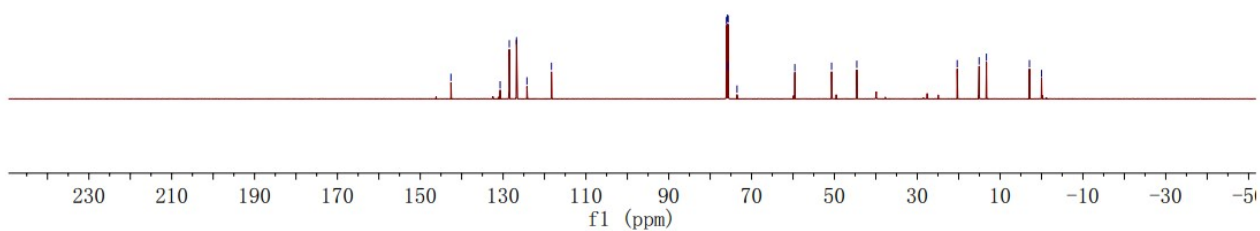

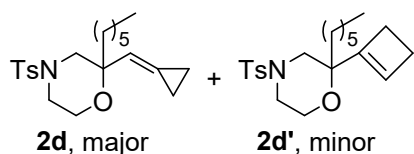

**Compound 2d:** An inseparable mixture of **2d** and **2d'** in a 5:1 ratio determined by  $^1\text{H}$  NMR analysis; Yield: 54.2 mg, 72%; a yellow oil; Eluent: PE/EA = 10/1;  $^1\text{H}$  NMR (400 MHz,  $\text{CDCl}_3$ , TMS)  $\delta$  7.62 (d,  $J = 8.0$  Hz, 2H), 7.35 (d,  $J = 8.0$  Hz, 2H), 5.72 (s, 1H), 3.92 – 3.81(m, 1H), 3.72 – 3.65 (m, 1H), 3.61 (d,  $J = 11.2$  Hz, 1H), 3.21 – 3.16 (m, 1H), 2.59 – 2.52 (m, 1H), 2.44 (s, 3H), 2.41 – 2.39 (m, 1H), 1.71 – 1.58 (m, 1H), 1.56 – 1.37 (m, 1H), 1.32 – 1.13 (m, 6H), 1.13 – 0.98 (m, 2H), 0.92 – 0.79 (m, 3H);  $^{13}\text{C}$  NMR (101 MHz,  $\text{CDCl}_3$ )  $\delta$  142.6, 130.7, 128.5, 126.7, 124.2, 118.3, 75.75, 59.5, 50.7, 44.6, 30.5, 28.5, 21.6, 21.4, 20.3, 12.9, 2.9, 0.0; IR (neat):  $\nu$  2926, 2855, 1454, 1351, 1305, 1278, 1125, 1089, 1048, 979, 948, 815, 802, 751, 731, 661  $\text{cm}^{-1}$ ; HRMS (ESI-TOF) Calcd for  $\text{C}_{21}\text{H}_{31}\text{NO}_3\text{NaS}$   $[\text{M}+\text{Na}]^+$ : 400.19169, found: 400.19253.

7.631  
7.611  
7.356  
7.336  
6.088  
5.716  
3.844  
3.821  
3.719  
3.709  
3.698  
3.689  
3.624  
3.596  
3.199  
3.171  
2.570  
2.564  
2.559  
2.443  
2.413  
2.408  
2.397  
1.648  
1.435  
1.418  
1.412  
1.285  
1.269  
1.254  
1.242  
1.226  
1.193  
1.189  
1.178  
1.172  
1.098  
1.094  
1.084  
1.079  
1.073  
1.069  
1.058  
1.053  
1.047  
1.032  
0.888  
0.876  
0.871  
0.859  
0.842

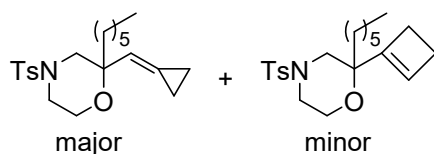

( $^1\text{H}$  NMR 400 MHz,  $\text{CDCl}_3$ )

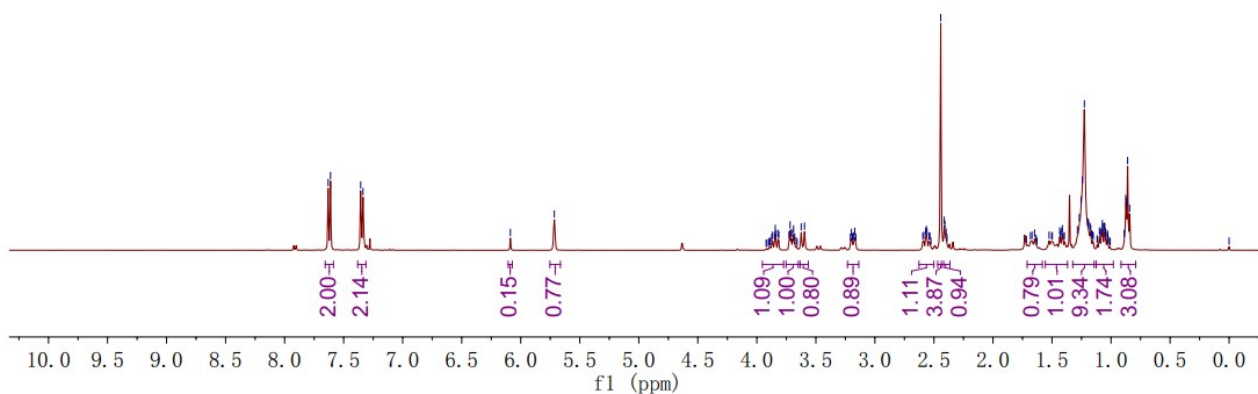

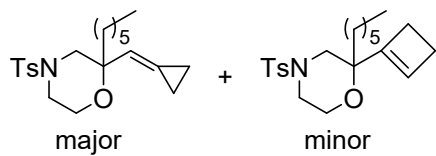

(<sup>13</sup>C NMR 100 MHz, CDCl<sub>3</sub>)

-142.566  
 130.728  
 128.493  
 126.737  
 124.182  
 118.344

76.096  
 75.885  
 75.752  
 75.673  
 59.540  
 50.725  
 44.584  
 30.538  
 28.498  
 21.640  
 21.402  
 20.344  
 12.871  
 2.915  
 0.000

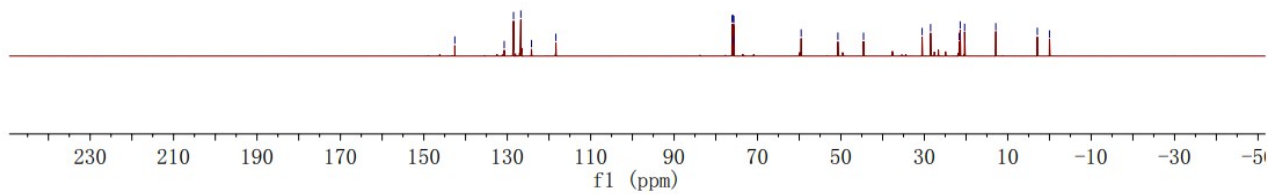

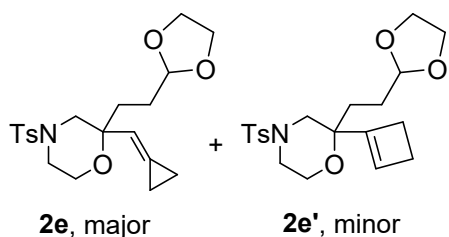

**Compound 2e:** An inseparable mixture of **2e** and **2e'** in a 5.6:1 ratio determined by  $^1\text{H}$  NMR analysis; Yield: 58.9 mg, 75%; a yellow oil; Eluent: PE/EA = 10/1;  $^1\text{H}$  NMR (400 MHz,  $\text{CDCl}_3$ , TMS)  $\delta$  7.61 (d,  $J = 8.0$  Hz, 2H), 7.34 (d,  $J = 8.0$  Hz, 2H), 5.71 (s, 1H), 4.84 – 4.80 (m, 1H), 3.98 – 3.78 (m, 5H), 3.74 – 3.68 (m, 1H), 3.56 (d,  $J = 11.1$  Hz, 1H), 3.18 – 3.16 (m, 1H), 2.61 – 2.54 (m, 1H), 2.50 – 2.35 (m, 4H), 1.92 – 1.76 (m, 1H), 1.71 – 1.51 (m, 3H), 1.45 – 1.38 (m, 1H), 1.34 – 0.97 (m, 3H);  $^{13}\text{C}$  NMR (101 MHz,  $\text{CDCl}_3$ )  $\delta$  142.6, 130.6, 128.5, 126.7, 124.6, 117.9, 103.0, 75.2, 63.7, 59.5, 50.8, 44.5, 26.2, 20.3, 2.8, 0.0; IR (neat):  $\nu$  2962, 2917, 2883, 2250, 1602, 1451, 1349, 1088, 1035, 978, 948, 908, 816, 729, 659  $\text{cm}^{-1}$ ; HRMS (ESI-TOF) Calcd for  $\text{C}_{20}\text{H}_{27}\text{NO}_5\text{NaS}$   $[\text{M}+\text{Na}]^+$ : 416.15021, found: 416.15041.

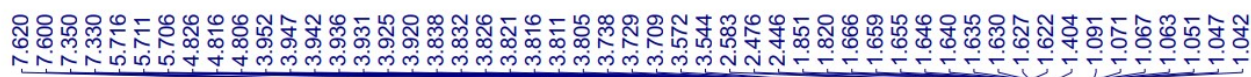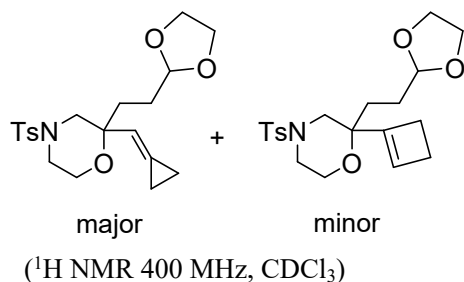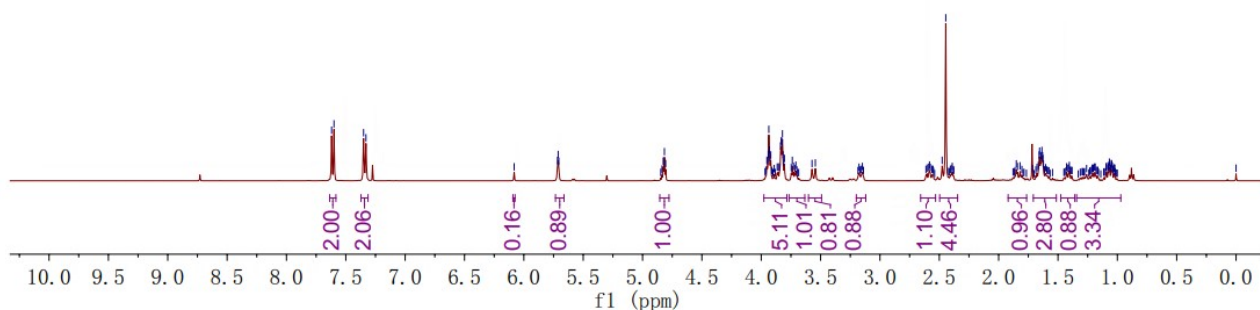

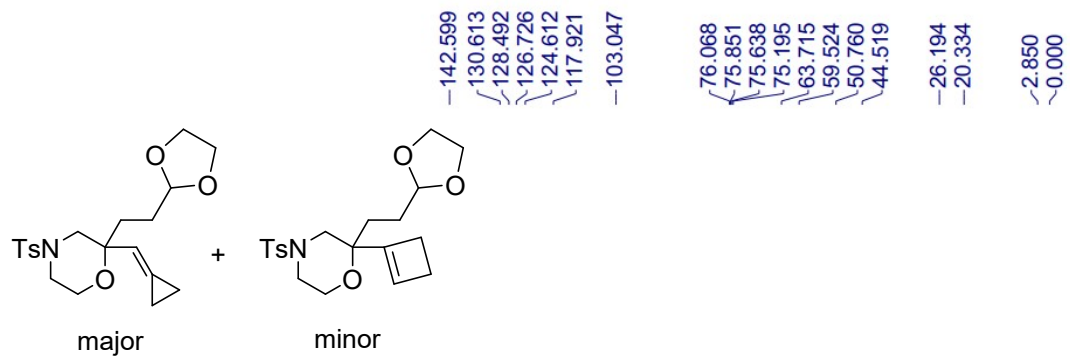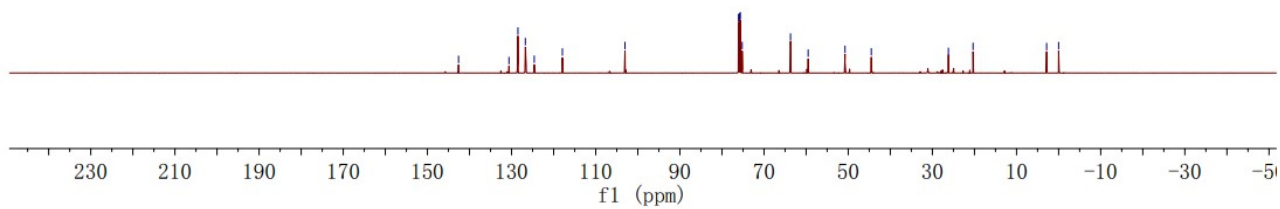



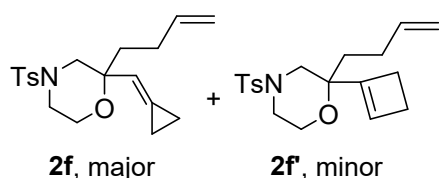

**Compound 2f:** An inseparable mixture of **2f** and **2f'** in a 11:1 ratio determined by  $^1\text{H}$  NMR analysis; Yield: 52.7 mg, 76%; a yellow oil; Eluent: PE/EA = 10/1;  $^1\text{H}$  NMR (400 MHz,  $\text{CDCl}_3$ , TMS)  $\delta$  7.62 (d,  $J = 8.0$  Hz, 2H), 7.35 (d,  $J = 8.0$  Hz, 2H), 5.85 – 5.69 (m, 2H), 5.03 – 4.88 (m, 2H), 3.87 – 3.81 (m, 1H), 3.74 – 3.67 (m, 1H), 3.59 (d,  $J = 11.2$  Hz, 1H), 3.20 – 3.15 (m, 1H), 2.61 – 2.54 (m, 1H), 2.47 – 2.44 (m, 4H), 2.13 – 1.91 (m, 2H), 1.83 – 1.76 (m, 1H), 1.65 – 1.57 (m, 1H), 1.46 – 1.39 (m, 1H), 1.24 – 1.16 (m, 1H), 1.14 – 1.00 (m, 2H);  $^{13}\text{C}$  NMR (101 MHz,  $\text{CDCl}_3$ )  $\delta$  142.6, 137.1, 130.7, 128.5, 126.7, 124.5, 118.0, 113.3, 75.5, 59.6, 50.7, 44.5, 36.4, 26.0, 20.3, 2.9, 0.0; IR (neat):  $\nu$  2982, 2917, 2839, 1597, 1454, 1348, 1165, 1088, 978, 908, 815, 750, 733, 665  $\text{cm}^{-1}$ ; HRMS (ESI-TOF) Calcd for  $\text{C}_{19}\text{H}_{25}\text{NO}_3\text{NaS}$   $[\text{M}+\text{Na}]^+$ : 370.14474, found: 370.14562.

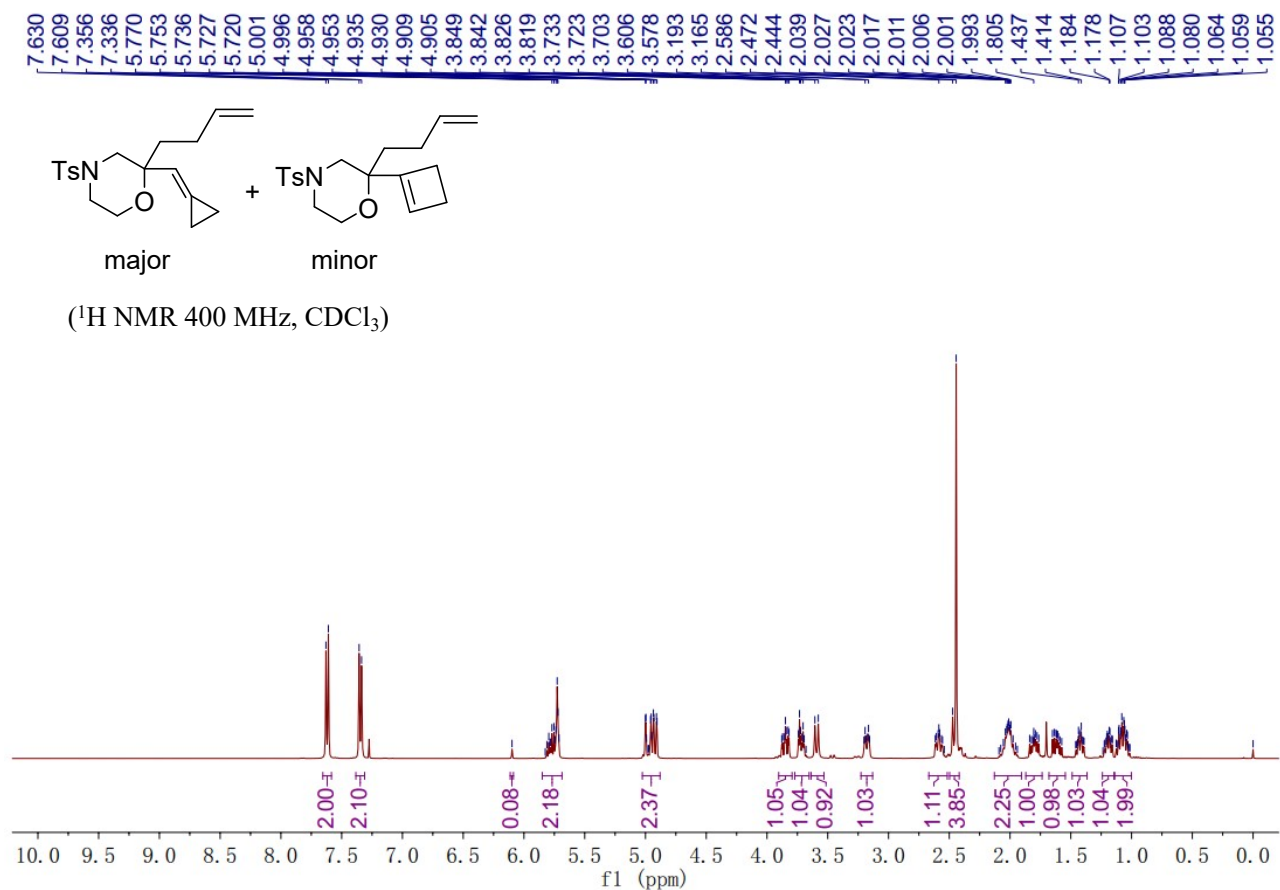

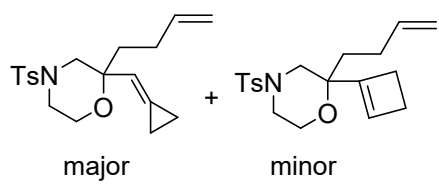

(<sup>13</sup>C NMR 100 MHz, CDCl<sub>3</sub>)

142.598  
 137.102  
 130.669  
 128.489  
 126.714  
 124.517  
 118.046  
 113.256

76.074  
 75.862  
 75.651  
 75.493  
 59.554  
 50.742  
 44.543  
 36.417  
 25.993  
 20.331

2.874  
 0.002

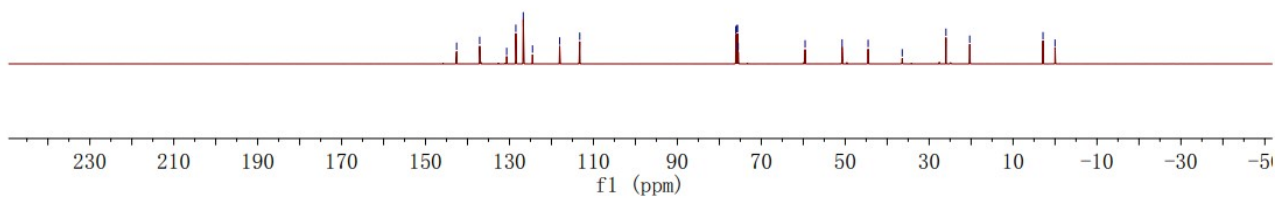

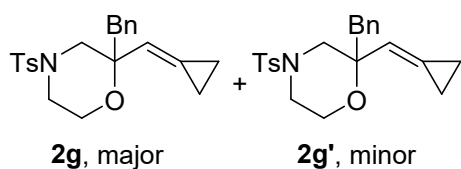

**Compound 2g:** An inseparable mixture of **2g** and **2g'** in a 3.2:1 ratio determined by  $^1\text{H}$  NMR analysis; Yield: 23.0 mg, 30%; a yellow oil; Eluent: PE/EA = 10/1;  $^1\text{H}$  NMR (400 MHz,  $\text{CDCl}_3$ , TMS)  $\delta$  7.52 (d,  $J = 8.1$  Hz, 2H), 7.28 (d,  $J = 7.9$  Hz, 2H), 7.22 – 7.10 (m, 3H), 7.00 – 6.98 (m, 2H), 5.57 (s, 1H), 3.89 – 3.63 (m, 2H), 3.51 (d,  $J = 11.2$  Hz, 1H), 3.16 (d,  $J = 11.2$  Hz, 1H), 2.83 – 2.75 (m, 2H), 2.48 – 2.38 (m, 4H), 2.33 – 2.24 (m, 1H), 1.11 – 1.04 (m, 1H), 1.00 – 0.75 (m, 2H), 0.54 – 0.48 (m, 1H);  $^{13}\text{C}$  NMR (101 MHz,  $\text{CDCl}_3$ )  $\delta$  143.8, 135.7, 131.6, 130.7, 129.7, 127.9, 127.7, 126.4, 118.6, 110.0, 77.3, 61.0, 51.6, 45.7, 45.3, 21.5, 3.7, 1.1; IR (neat):  $\nu$  2912, 1583, 1457, 1366, 1322, 1215, 1191, 1088, 1067, 981, 965, 830, 781  $\text{cm}^{-1}$ ; HRMS (ESI-TOF) Calcd for  $\text{C}_{22}\text{H}_{26}\text{NO}_3\text{S}$   $[\text{M}+\text{H}]^+$ : 384.1634, found: 384.1634.

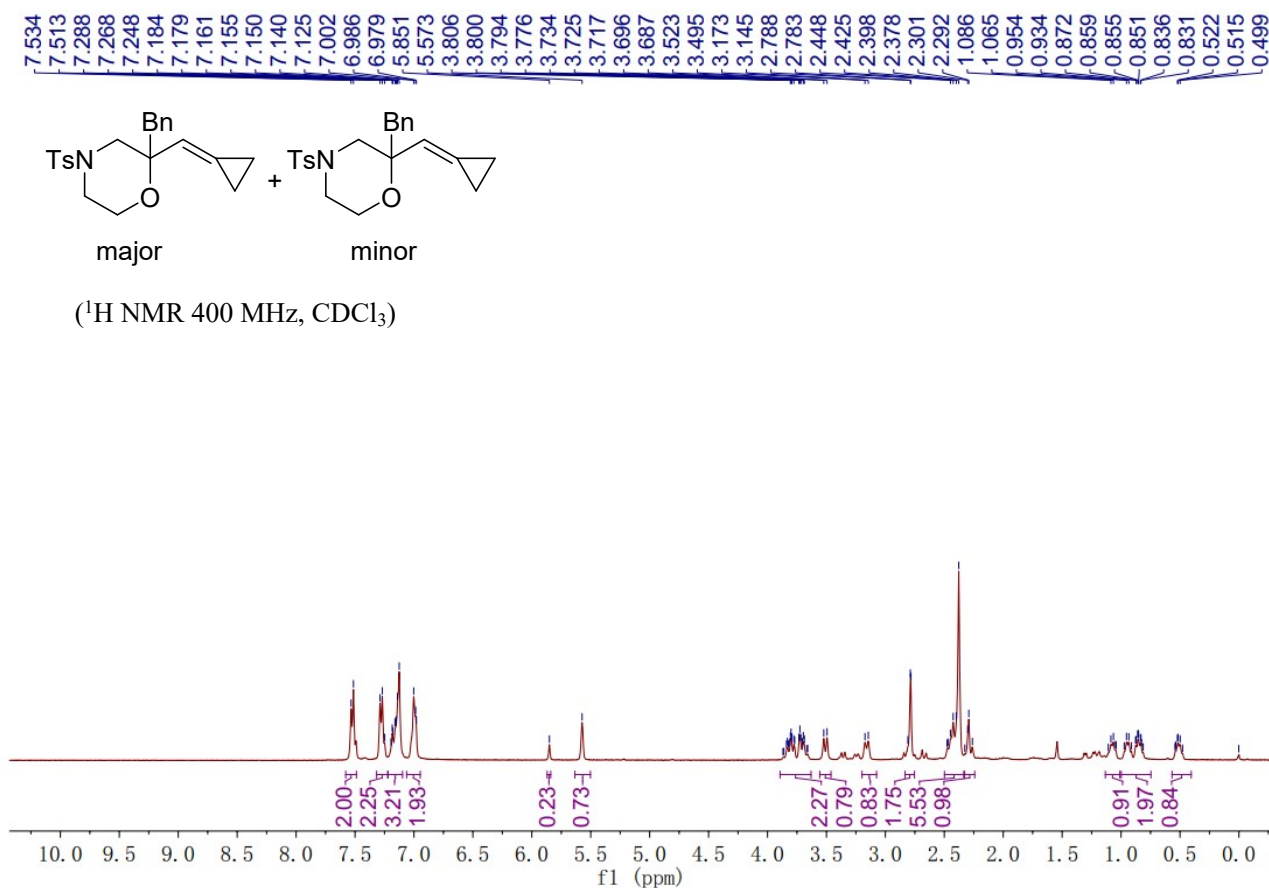

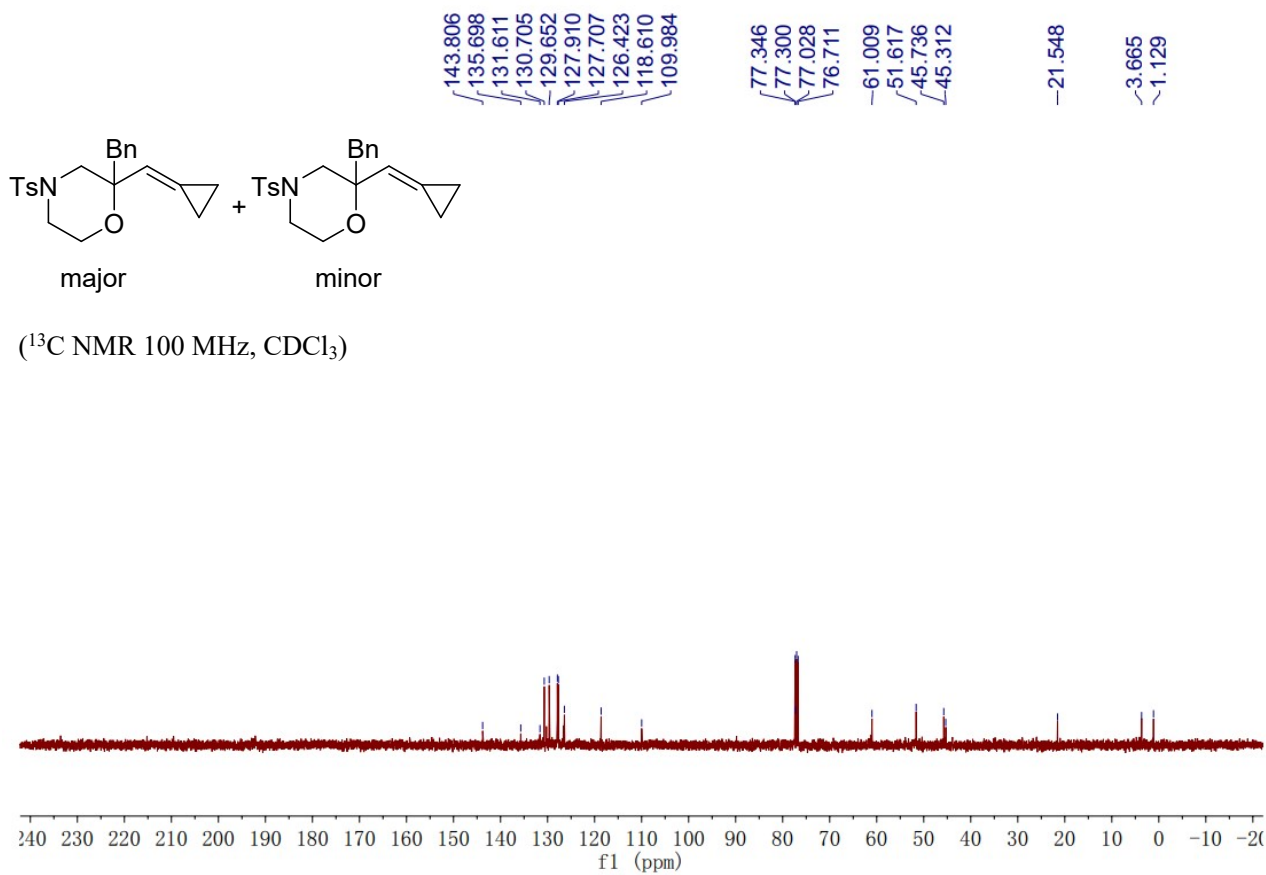

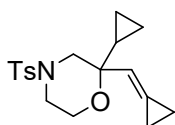

**Compound 2h:** Yield: 49.3 mg, 74%; A colorless solid; Mp: 143 – 145 °C; Eluent: PE/EA = 2/1; <sup>1</sup>H NMR (400 MHz, CDCl<sub>3</sub>, TMS) δ 7.64 (d, *J* = 8.0 Hz, 2H), 7.36 (d, *J* = 8.0 Hz, 2H), 5.51 (s, 1H), 3.94 – 3.91 (m, 1H), 3.89 – 3.83 (m, 1H), 3.73 – 3.69 (m, 1H), 3.36 – 3.32 (m, 1H), 2.45 (s, 3H), 2.42 – 2.33 (m, 2H), 1.56 – 1.49 (m, 1H), 1.24 – 1.17 (m, 1H), 1.15 – 0.99 (m, 2H), 0.92 – 0.85 (m, 1H), 0.47 – 0.27 (m, 3H), 0.24 – 0.18 (m, 1H); <sup>13</sup>C NMR (101 MHz, CDCl<sub>3</sub>) δ 143.7, 131.8, 129.6, 127.9, 127.3, 116.5, 61.0, 52.3, 45.7, 21.5, 18.6, 4.2, 1.3, 0.0, - 0.1; IR (neat): ν 2973, 2892, 2836, 1442, 1351, 1342, 1163, 1083, 1046, 979, 957, 880, 744, 654 cm<sup>-1</sup>; HRMS (ESI-TOF) Calcd for C<sub>18</sub>H<sub>23</sub>NO<sub>3</sub>NaS [M+Na]<sup>+</sup>: 356.12909, found: 356.12932.

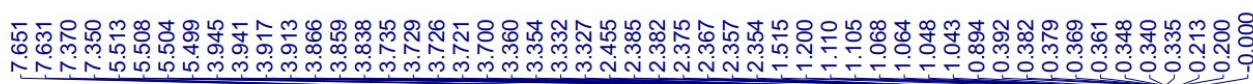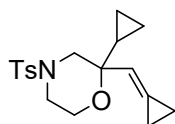

(<sup>1</sup>H NMR 400 MHz, CDCl<sub>3</sub>)

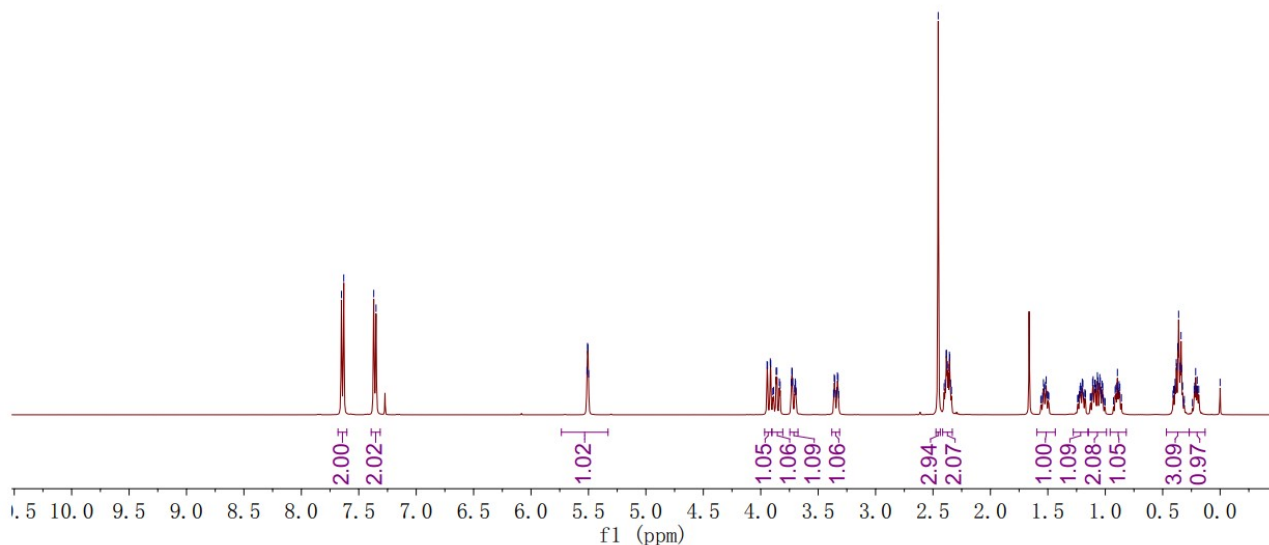

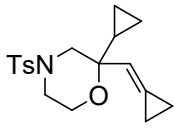

-143.714  
131.764  
129.645  
127.940  
127.325  
-116.541  
77.205  
76.994  
76.782  
61.000  
52.305  
45.681  
21.501  
18.645  
4.189  
1.250  
-0.000  
-0.129

(<sup>13</sup>C NMR 100 MHz, CDCl<sub>3</sub>)

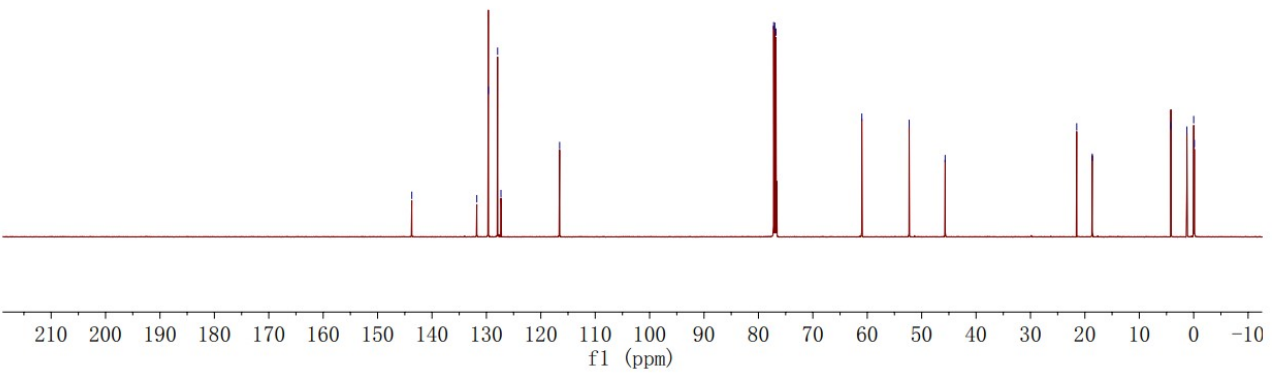

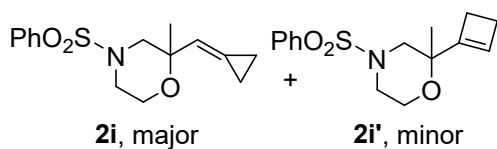

**Compound 2i:** An inseparable mixture of **2i** and **2i'** in a 32:1 ratio determined by  $^1\text{H}$  NMR analysis; Yield: 57.4 mg, 98%; a yellow oil; Eluent: PE/EA = 10/1;  $^1\text{H}$  NMR (400 MHz,  $\text{CDCl}_3$ , TMS)  $\delta$  7.79 – 7.70 (m, 2H), 7.66 – 7.60 (m, 1H), 7.58 – 7.54 (m, 2H), 5.84 (s, 1H), 3.88 – 3.82 (m, 1H), 3.77 – 3.72 (m, 1H), 3.56 (d,  $J = 11.2$  Hz, 1H), 3.25 – 3.10 (m, 1H), 2.65 – 2.59 (m, 1H), 2.50 (d,  $J = 11.2$  Hz, 1H), 1.44 – 1.34 (m, 1H), 1.31 (s, 3H), 1.28 – 1.17 (m, 2H), 1.10 – 0.99 (m, 2H);  $^{13}\text{C}$  NMR (101 MHz,  $\text{CDCl}_3$ )  $\delta$  134.0, 132.0, 128.1, 126.9, 123.9, 119.3, 73.5, 59.9, 51.9, 44.6, 24.2, 2.9, 0.0; IR (neat):  $\nu$  2971, 2842, 2359, 1446, 1342, 1309, 1280, 1168, 1129, 1081, 1013, 979, 921, 775, 751, 709, 689  $\text{cm}^{-1}$ ; HRMS (ESI-TOF) Calcd for  $\text{C}_{15}\text{H}_{19}\text{NO}_3\text{NaS}$   $[\text{M}+\text{Na}]^+$ : 316.09779, found: 316.09880.

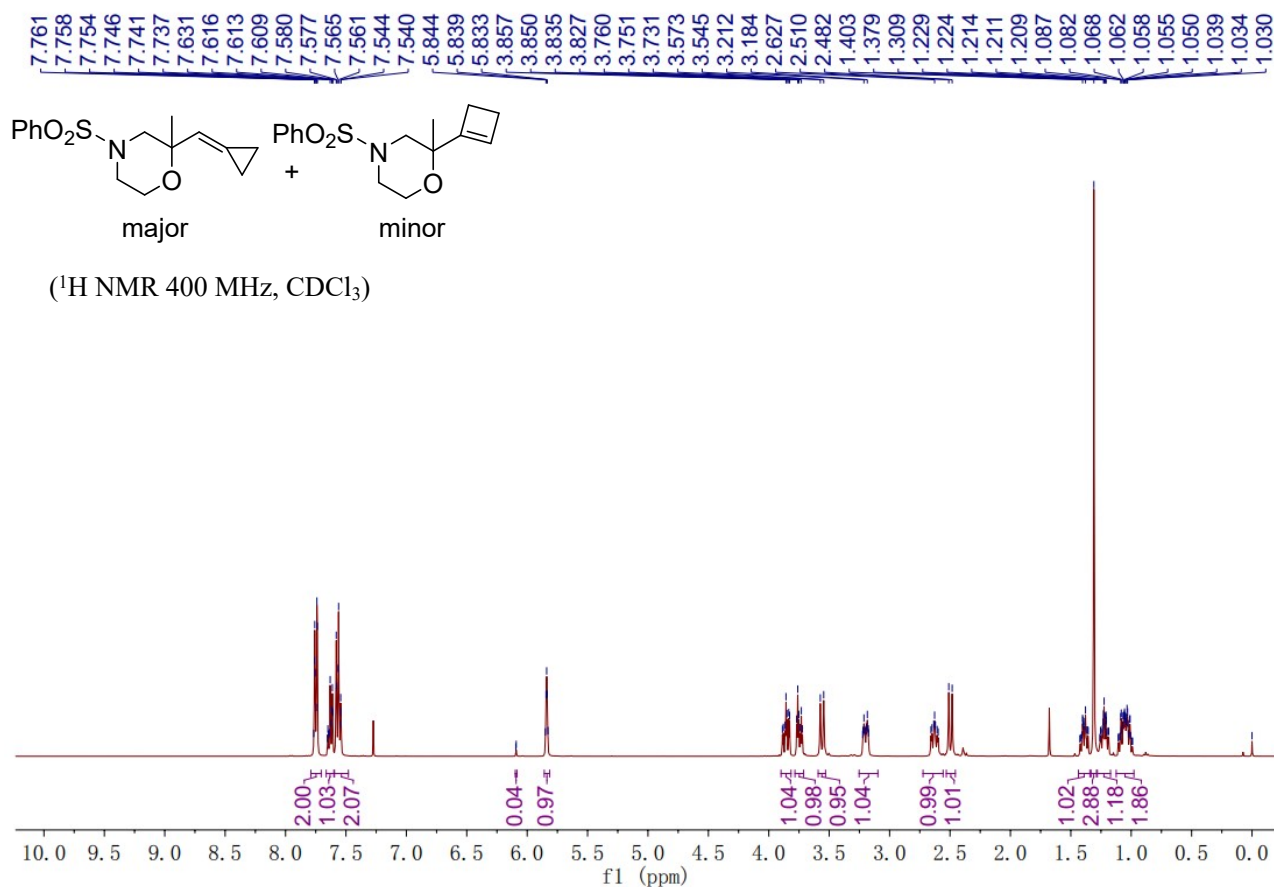

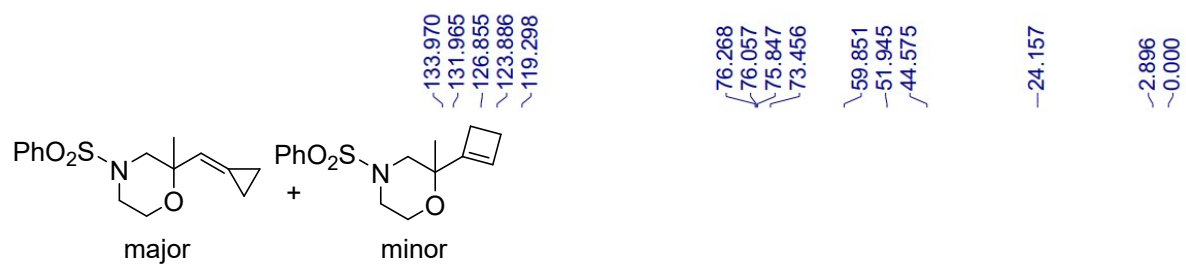

(<sup>13</sup>C NMR 100 MHz, CDCl<sub>3</sub>)

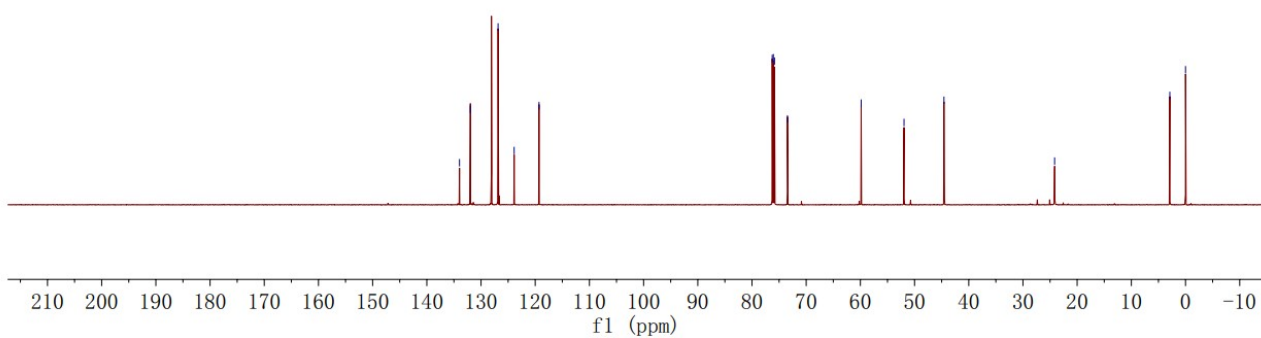



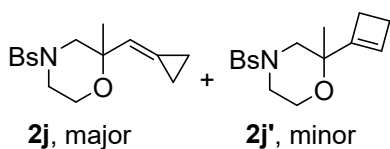

**Compound 2j:** An inseparable mixture of **2j** and **2j'** in a 33:1 ratio determined by  $^1\text{H}$  NMR analysis; Yield: 64.6 mg, 87%; a yellow oil; Eluent: PE/EA = 10/1;  $^1\text{H}$  NMR (400 MHz,  $\text{CDCl}_3$ , TMS)  $\delta$  7.74 – 7.67 (m, 2H), 7.64 – 7.57 (m, 2H), 5.83 (s, 1H), 3.88 – 3.82 (m, 1H), 3.77 – 3.72 (m, 1H), 3.56 (d,  $J = 11.2$  Hz, 1H), 3.22 – 3.17 (m, 1H), 2.66 – 2.56 (m, 1H), 2.47 (d,  $J = 11.2$  Hz, 1H), 1.44 – 1.33 (m, 1H), 1.31 (s, 3H), 1.27 – 1.16 (m, 1H), 1.11 – 0.99 (m, 2H);  $^{13}\text{C}$  NMR (101 MHz,  $\text{CDCl}_3$ )  $\delta$  133.0, 131.4, 128.3, 127.1, 124.0, 119.2, 73.4, 59.7, 51.8, 44.5, 24.2, 2.9, 0.0; IR (neat):  $\nu$  2968, 2917, 1573, 1452, 1354, 1165, 1126, 1015, 978, 948, 925, 810, 706  $\text{cm}^{-1}$ ; HRMS (ESI-TOF) Calcd for  $\text{C}_{15}\text{H}_{18}\text{NO}_3\text{NaSBr}$   $[\text{M}+\text{Na}]^+$ : 394.00830, found: 394.00916.

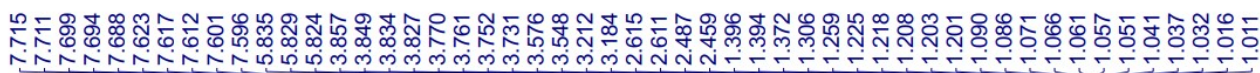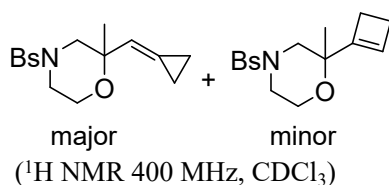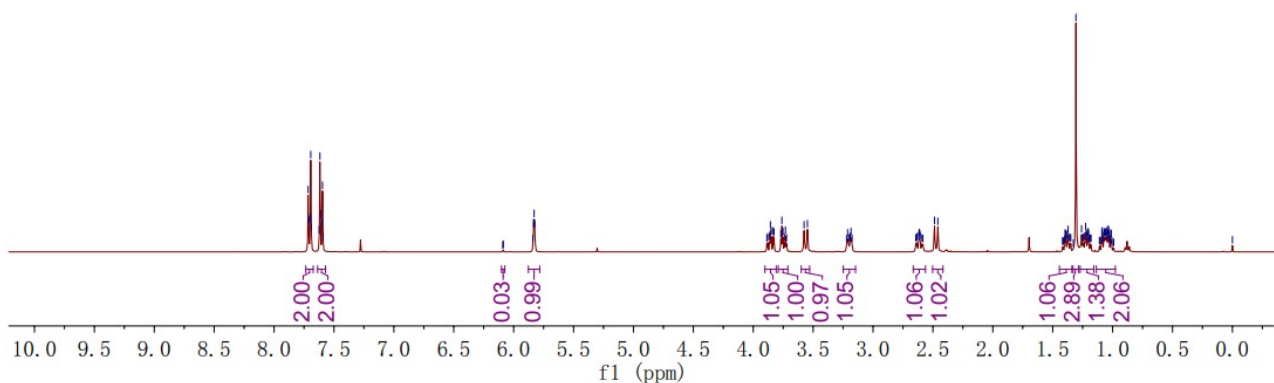

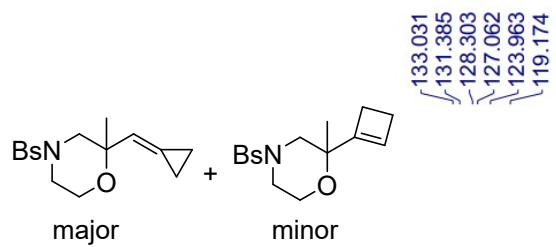

133.031  
 131.385  
 128.303  
 127.062  
 123.963  
 119.174

76.266  
 76.054  
 75.842  
 73.405  
 59.739  
 51.839  
 44.504

-24.180

-2.879  
-0.003

(<sup>13</sup>C NMR 100 MHz, CDCl<sub>3</sub>)

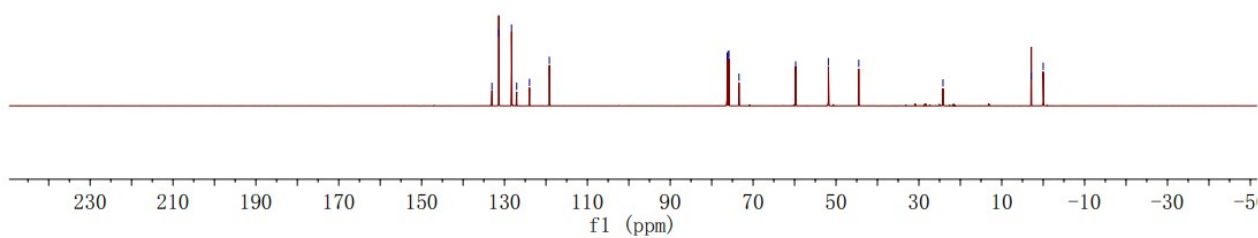

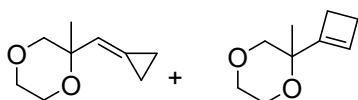

**2k**, major

**2k'**, minor

**Compound 2k:** An inseparable mixture of **2k** and **2k'** in a 10:1 ratio determined by  $^1\text{H}$  NMR analysis; Yield: 30.5 mg, 99%; a yellow oil; Eluent: PE/EA = 10/1;  $^1\text{H}$  NMR (400 MHz,  $\text{CDCl}_3$ , TMS)  $\delta$  5.91 (s, 1H), 3.91 (d,  $J = 11.4$  Hz, 1H), 3.88 – 3.82 (m, 1H), 3.71 – 3.63 (m, 3H), 3.51 – 3.43 (m, 1H), 1.29 (s, 3H), 1.27 – 1.11 (m, 2H), 1.12 – 1.00 (m, 2H);  $^{13}\text{C}$  NMR (101 MHz,  $\text{CDCl}_3$ )  $\delta$  123.1, 119.8, 72.8, 72.6, 65.7, 60.7, 22.2, 2.6, 0.0; IR (neat):  $\nu$  2955, 1450, 1447, 1221, 1086, 989, 971, 930, 780, 753  $\text{cm}^{-1}$ ; HRMS (FI) Calcd for  $\text{C}_9\text{H}_{14}\text{O}_2$ : 154.0988, found: 154.0989.

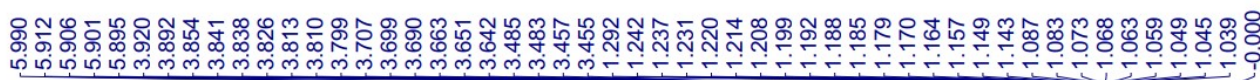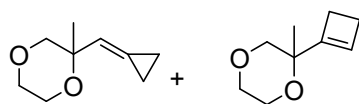

major

minor

( $^1\text{H}$  NMR 400 MHz,  $\text{CDCl}_3$ )

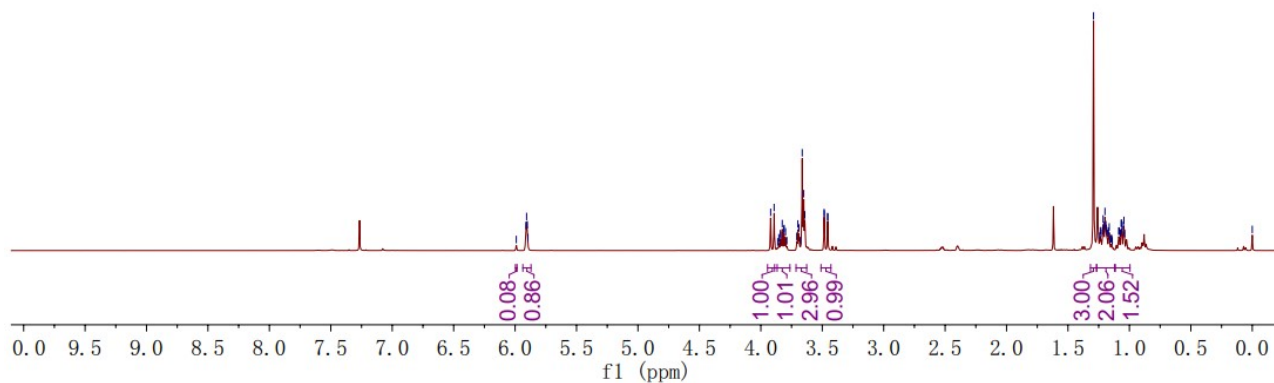

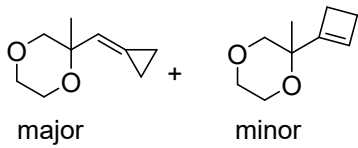

(<sup>13</sup>C NMR 100 MHz, CDCl<sub>3</sub>)

~123.059  
 ~119.823  
 76.254  
 76.042  
 75.831  
 72.805  
 72.611  
 65.726  
 60.652  
 -22.181  
 ~2.630  
 ~0.001

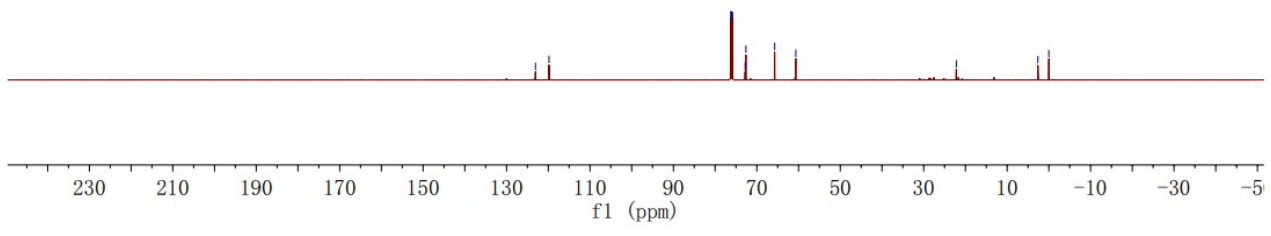

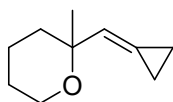

**Compound 2l:** Yield: 27.4 mg, 90%; a yellow oil; Eluent: PE/EA = 10/1;  $^1\text{H}$  NMR (400 MHz,  $\text{CDCl}_3$ , TMS)  $\delta$  5.86 – 5.84 (m, 1H), 3.74 – 3.69 (m, 1H), 3.68 – 3.62 (m, 1H), 2.02 – 1.96 (m, 1H), 1.66 – 1.41 (m, 5H), 1.26 (s, 3H), 1.19 – 1.10 (m, 2H), 1.08 – 0.96 (m, 2H);  $^{13}\text{C}$  NMR (101 MHz,  $\text{CDCl}_3$ )  $\delta$  122.7, 120.8, 74.4, 62.2, 33.9, 27.9, 25.0, 19.4, 2.7, 0.0; IR (neat):  $\nu$  2932, 1449, 1353, 1208, 1173, 1102, 1086, 1043, 962, 938, 924, 812, 751, 734  $\text{cm}^{-1}$ ; HRMS (FI) Calcd for  $\text{C}_{10}\text{H}_{16}\text{O}$ : 152.1196, found: 152.1199.

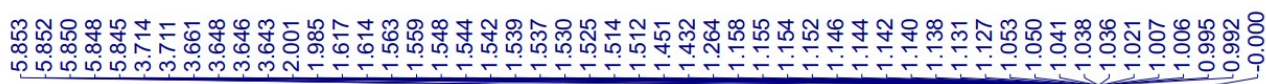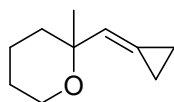

( $^1\text{H}$  NMR 400 MHz,  $\text{CDCl}_3$ )

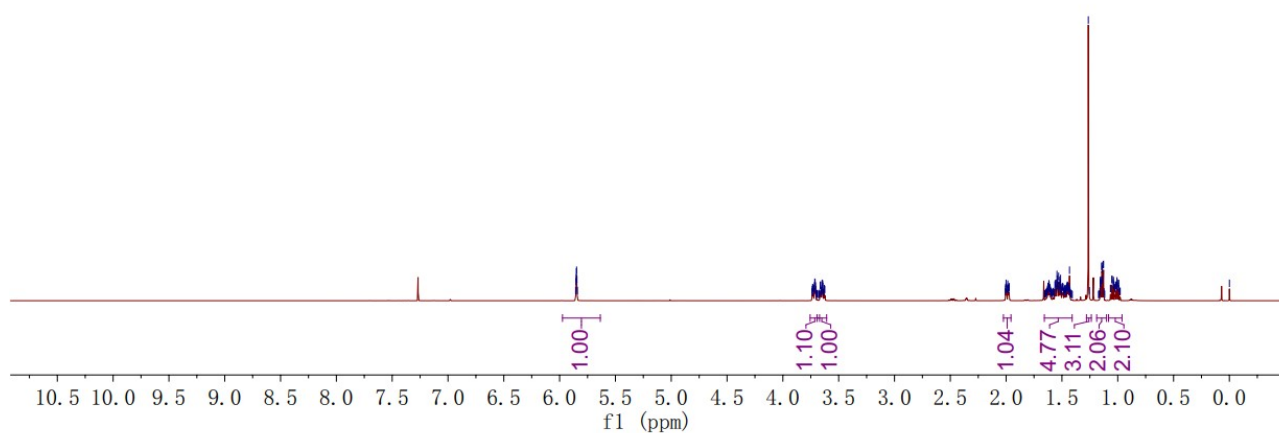

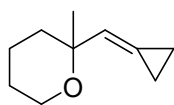

(<sup>13</sup>C NMR 100 MHz, CDCl<sub>3</sub>)

~122.729  
~120.761

76.397  
76.186  
75.966  
74.422  
-62.214

~33.917  
~27.926  
~25.050  
~19.422

~2.712  
~0.000

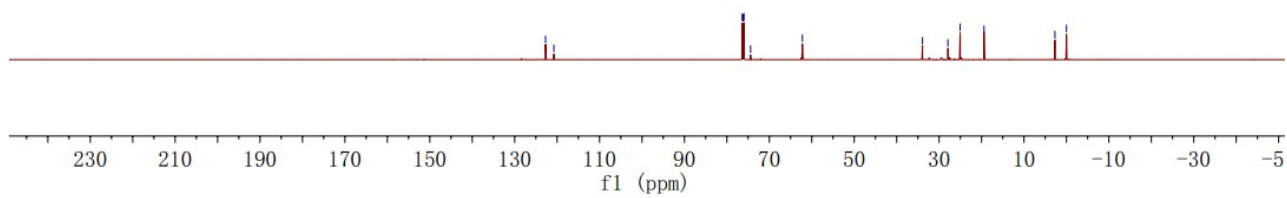

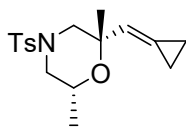

**Compound 2m:** Yield: 58.8 mg, 92%; a yellow oil; Eluent: PE/EA = 10/1;  $^1\text{H}$  NMR (400 MHz,  $\text{CDCl}_3$ , TMS)  $\delta$  7.62 (d,  $J = 8.0$  Hz, 2H), 7.34 (d,  $J = 8.0$  Hz, 2H), 5.79 – 5.76 (m, 1H), 4.10 – 4.02 (m, 1H), 3.60 – 3.56 (m, 1H), 3.51 – 3.48 (m, 1H), 2.44 (s, 3H), 2.26 (d,  $J = 11.3$  Hz, 1H), 1.89 (t,  $J = 10.8$  Hz, 1H), 1.57 (s, 3H), 1.30 – 1.13 (m, 2H), 1.11 (d,  $J = 6.2$  Hz, 3H), 1.02 – 0.97 (m, 2H);  $^{13}\text{C}$  NMR (101 MHz,  $\text{CDCl}_3$ )  $\delta$  143.7, 132.4, 129.7, 127.7, 123.4, 122.2, 74.6, 64.7, 52.9, 51.5, 21.5, 20.1, 19.0, 3.8, 0.7; IR (neat):  $\nu$  2232, 1349, 1313, 1218, 1173, 1102, 1086, 1043, 962, 812, 751, 734  $\text{cm}^{-1}$ ; HRMS (ESI-TOF) Calcd for  $\text{C}_{17}\text{H}_{23}\text{NO}_3\text{NaS}$   $[\text{M}+\text{Na}]^+$ : 344.12909, found: 344.12869.

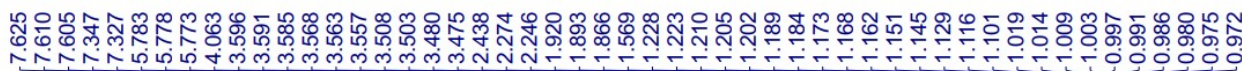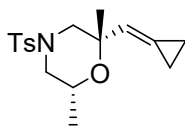

( $^1\text{H}$  NMR 400 MHz,  $\text{CDCl}_3$ )

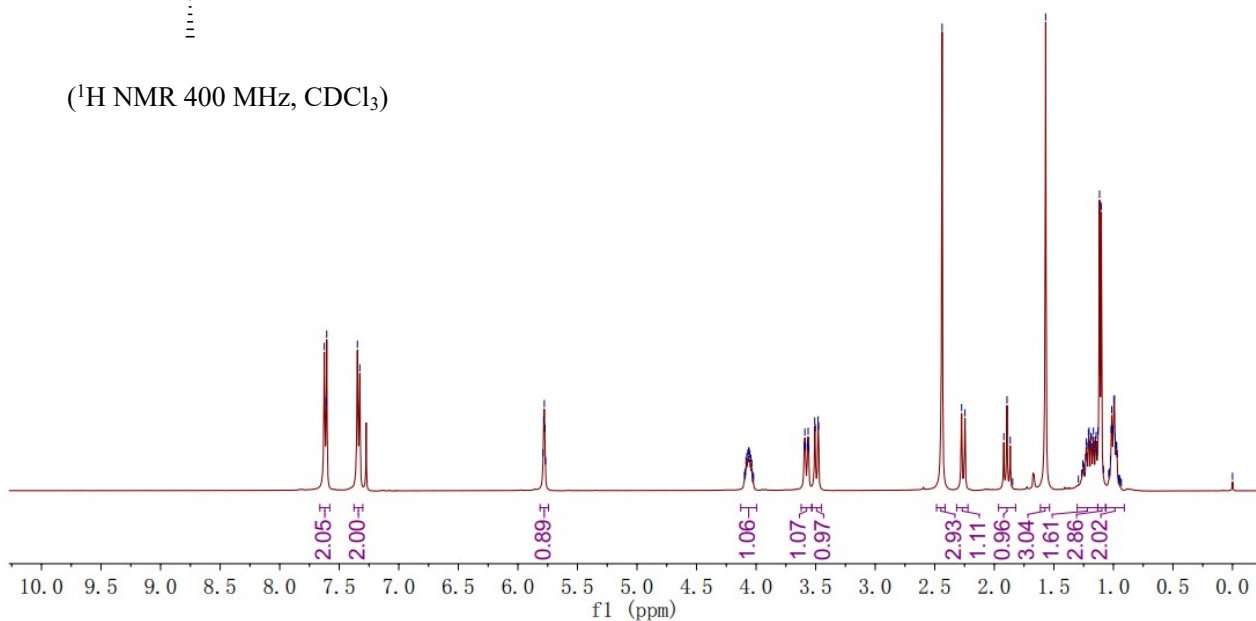

-143.715  
 132.351  
 129.668  
 127.684  
 123.402  
 122.197  
 77.356  
 77.039  
 76.721  
 74.612  
 64.745  
 52.869  
 51.545  
 21.513  
 20.100  
 19.031  
 3.832  
 0.695

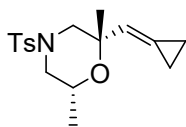

(<sup>1</sup>H NMR 400 MHz, CDCl<sub>3</sub>)

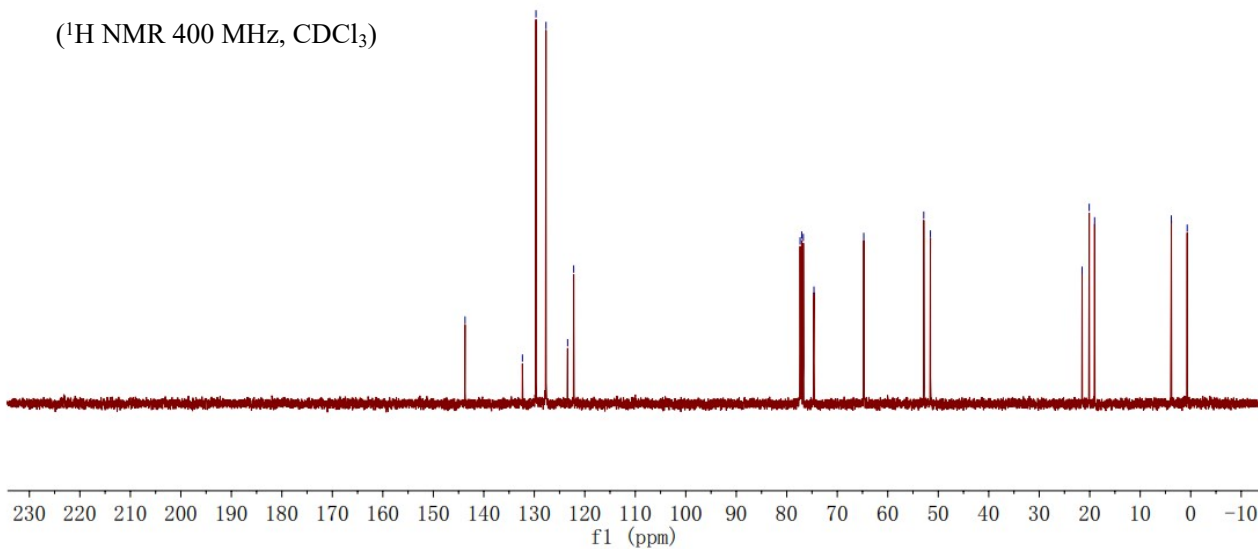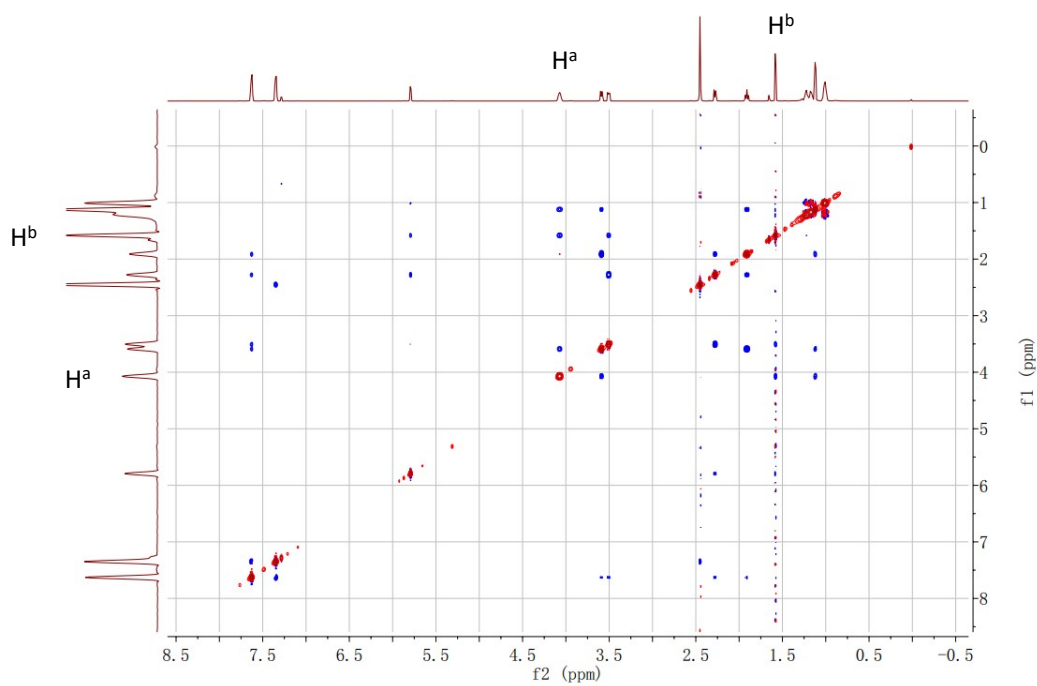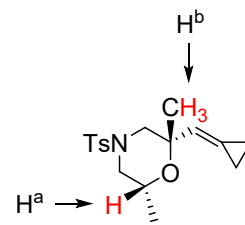

**2m-NOESY**  
 (500 MHz, CDCl<sub>3</sub>)



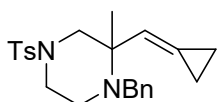

**Compound 2n:** Yield: 61.0 mg, 77%; a yellow oil; Eluent: PE/EA = 10/1;  $^1\text{H}$  NMR (400 MHz,  $\text{CDCl}_3$ , TMS)  $\delta$  7.60 (d,  $J = 7.9$  Hz, 2H), 7.31 (d,  $J = 7.9$  Hz, 2H), 7.24 – 7.23 (m, 4H), 7.19 – 7.15 (m, 1H), 5.85 (s, 1H), 3.69 (d,  $J = 13.8$  Hz, 1H), 3.27 – 3.21 (m, 2H), 3.09 (d,  $J = 10.9$  Hz, 1H), 2.61 – 2.57 (m, 4H), 2.43 (s, 3H), 1.41 (s, 3H), 1.32 – 1.20 (m, 2H), 1.07 – 0.90 (m, 2H);  $^{13}\text{C}$  NMR (101 MHz,  $\text{CDCl}_3$ )  $\delta$  143.5, 139.8, 132.5, 129.6, 128.4, 128.1, 127.8, 126.8, 124.7, 122.0, 59.1, 56.5, 54.3, 46.8, 44.9, 21.5, 4.4, 0.8; IR (neat):  $\nu$  2967, 2847, 2243, 1698, 14593, 1365, 1167, 1102, 1021, 987, 825, 734, 629, 559, 543  $\text{cm}^{-1}$ ; HRMS (ESI-TOF) Calcd for  $\text{C}_{23}\text{H}_{29}\text{N}_2\text{O}_2\text{S}$   $[\text{M}+\text{H}]^+$ : 397.1949, found: 397.1949.

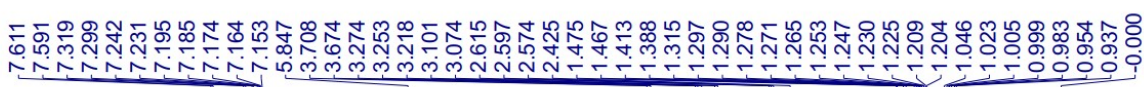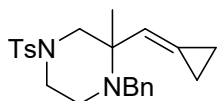

( $^1\text{H}$  NMR 400 MHz,  $\text{CDCl}_3$ )

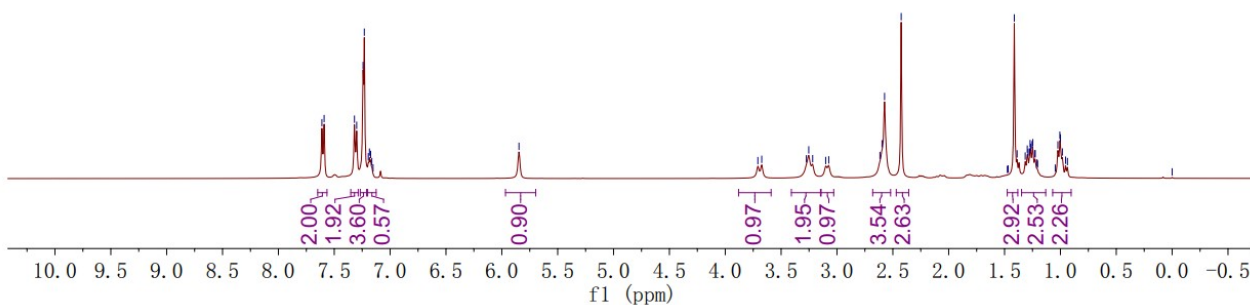

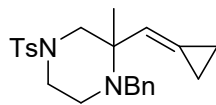

143.489  
139.796  
132.545  
129.620  
128.397  
128.148  
127.757  
126.763  
124.726  
122.015

77.391  
77.073  
76.755

59.146  
56.495  
54.287  
46.781  
44.920

-21.548

-4.383  
-0.794

(<sup>13</sup>C NMR 100 MHz, CDCl<sub>3</sub>)

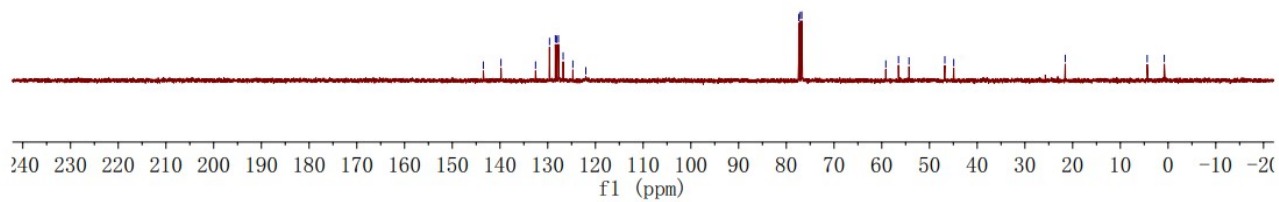

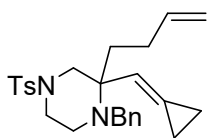

**Compound 2o:** Yield: 74.1 mg, 85%; a yellow oil; Eluent: PE/EA = 10/1;  $^1\text{H}$  NMR (400 MHz,  $\text{CDCl}_3$ , TMS)  $\delta$  7.62 (d,  $J = 8.1$  Hz, 2H), 7.32 (d,  $J = 8.1$  Hz, 2H), 7.27 – 7.12 (m, 5H), 5.94 (s, 1H), 5.85 – 5.79 (m, 1H), 5.02 (d,  $J = 17.0$  Hz, 1H), 4.95 (d,  $J = 10.2$  Hz, 1H), 3.60 (d,  $J = 14.0$  Hz, 1H), 3.44 (d,  $J = 14.0$  Hz, 1H), 3.04 – 2.78 (m, 4H), 2.65 – 2.55 (m, 2H), 2.43 (s, 3H), 2.30 – 2.12 (m, 1H), 2.07 – 1.83 (m, 3H), 1.40 – 1.15 (m, 4H);  $^{13}\text{C}$  NMR (101 MHz,  $\text{CDCl}_3$ )  $\delta$  143.6, 139.8, 138.8, 132.3, 129.7, 128.3, 128.2, 127.9, 126.8, 125.2, 114.4, 77.4, 60.6, 53.2, 53.1, 46.5, 45.1, 28.2, 21.6, 4.9, 1.0; IR (neat):  $\nu$  2956, 1727, 1602, 1492, 1448, 1271, 1121, 1070, 1001, 962, 910, 815, 768, 729, 661, 522  $\text{cm}^{-1}$ ; HRMS (ESI-TOF) Calcd for  $\text{C}_{26}\text{H}_{33}\text{N}_2\text{O}_2\text{S}$   $[\text{M}+\text{H}]^+$ : 437.22573, found: 437.22585.

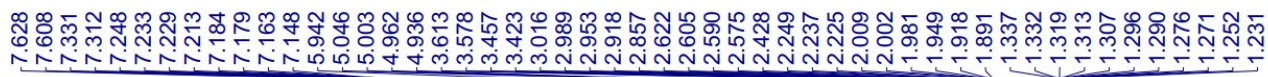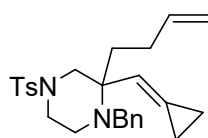

( $^1\text{H}$  NMR 400 MHz,  $\text{CDCl}_3$ )

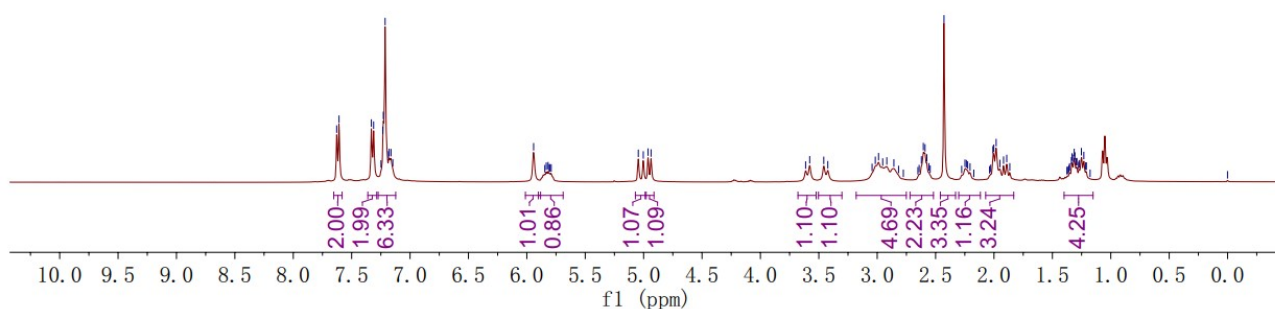

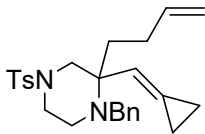

143.597  
139.790  
138.784  
132.298  
129.672  
128.329  
128.219  
127.879  
126.795  
125.208  
-114.385

77.476  
77.361  
77.157  
76.838

60.584  
53.204  
53.078  
46.536  
45.113

-28.238  
-21.583

-4.892  
-1.049

(<sup>13</sup>C NMR 100 MHz, CDCl<sub>3</sub>)

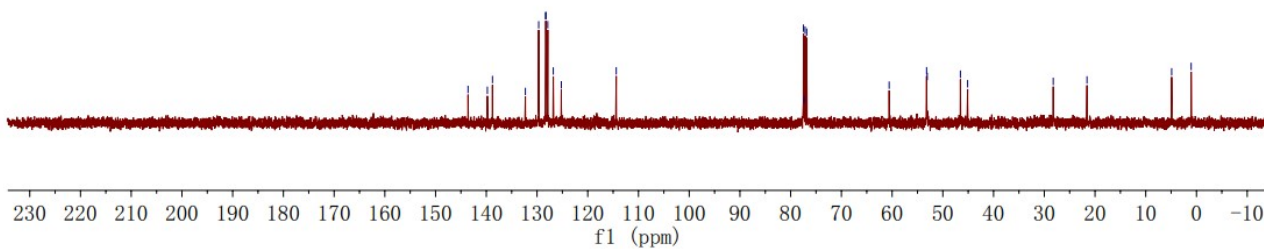

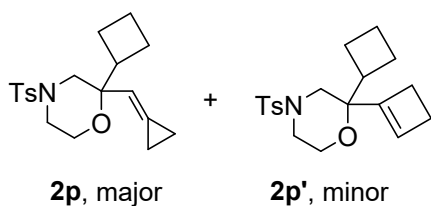

**Compound 2p:** An inseparable mixture of **2p** and **2p'** in a 1.6:1 ratio determined by  $^1\text{H}$  NMR analysis; Yield: 52.7 mg, 76%; a yellow oil; Eluent: PE/EA = 10/1;  $^1\text{H}$  NMR (400 MHz,  $\text{CDCl}_3$ , TMS)  $\delta$  7.61 (d,  $J = 8.0$  Hz, 2H), 7.35 – 7.33 (m, 2H), 6.05 (s, 1H, minor), 5.72 – 5.70 (m, 1H, major), 3.95 (td,  $J = 11.6, 2.8$  Hz, 1H, minor), 3.87 (td,  $J = 11.6, 2.8$  Hz, 1H, major), 3.77 – 3.68 (m, 3H, major 2H + minor 1H), 3.55 – 3.52 (m, 1H, minor), 3.46 – 3.42 (m, 1H, minor), 3.37 – 3.32 (m, 1H, major), 2.59 – 2.54 (m, 1H, minor), 2.49 – 2.29 (m, 8H), 2.15 – 2.12 (m, 1H, major), 2.08 (d,  $J = 11.3$  Hz, 1H, minor), 2.05 – 1.89 (m, 2H), 1.82 – 1.61 (m, 5H), 1.52 – 1.45 (m, 1H, major), 1.24 – 1.17 (m, 1H, major), 1.14 – 1.04 (m, 2H, major);  $^{13}\text{C}$  NMR (101 MHz,  $\text{CDCl}_3$ )  $\delta$  145.4, 142.4, 132.1, 131.1, 130.5, 128.3, 128.3, 126.6, 126.3, 124.8, 116.3, 76.0, 75.9, 75.7, 75.5, 73.5, 60.0, 59.6, 48.0, 46.9, 44.4, 44.3, 42.0, 40.4, 28.8, 25.1, 20.9, 20.8, 20.8, 20.7, 20.7, 20.2, 16.4, 16.2, 2.9, 0.0; IR (neat):  $\nu$  2912, 1588, 1447, 1346, 1323, 1165, 1091, 1088, 1065, 971, 955, 810, 751  $\text{cm}^{-1}$ ; HRMS (ESI-TOF) Calcd for  $\text{C}_{19}\text{H}_{25}\text{NO}_3\text{NaS}$   $[\text{M}+\text{Na}]^+$ : 370.14474, found: 370.14555.

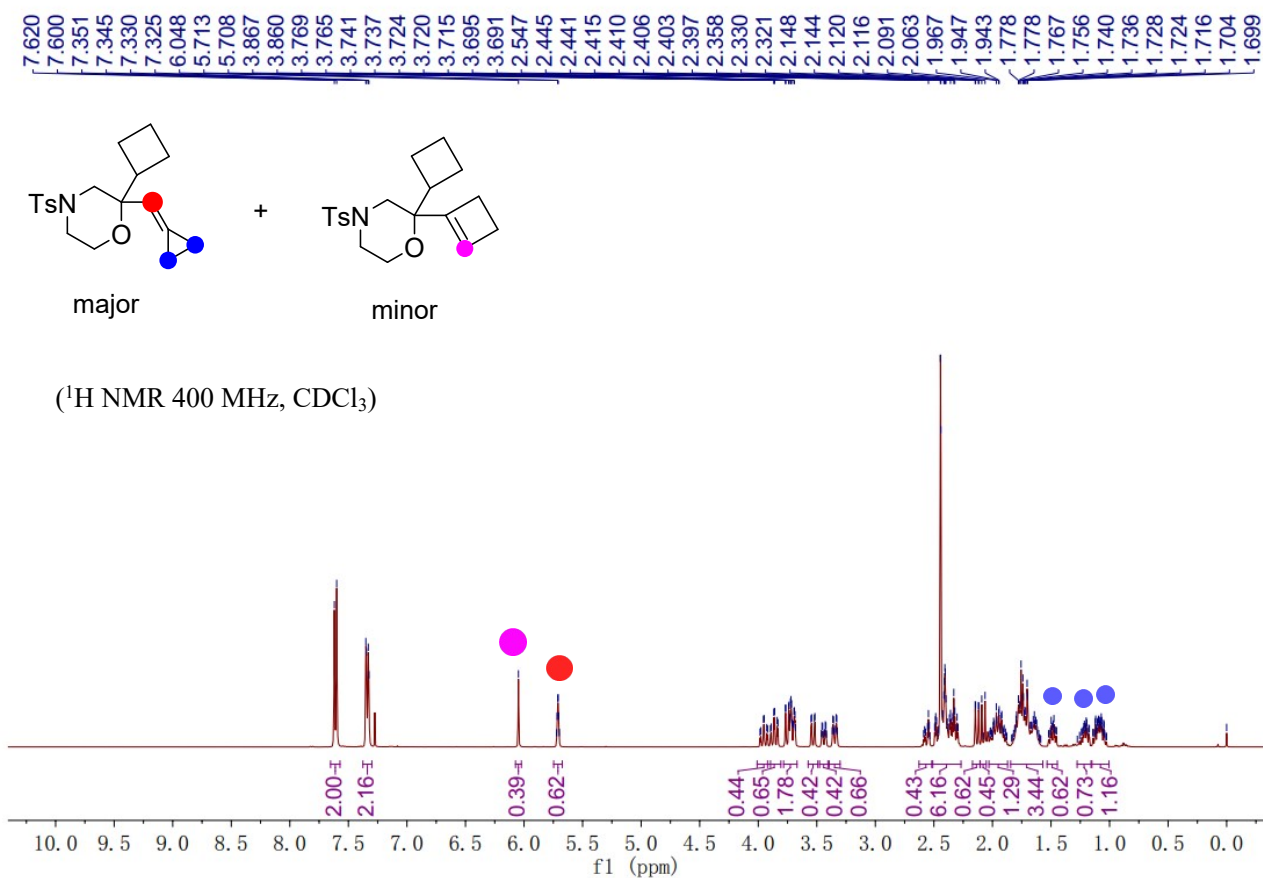

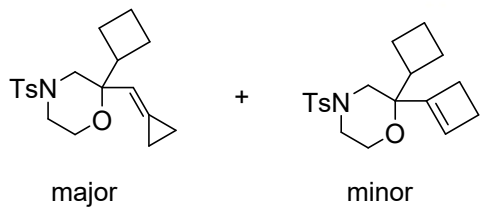

(<sup>13</sup>C NMR 100 MHz, CDCl<sub>3</sub>)

- 145.432
- 142.353
- 132.067
- 131.056
- 130.541
- 128.344
- 128.289
- 126.569
- 126.349
- 124.787
- 116.347
- 75.960
- 75.901
- 75.689
- 75.478
- 73.516
- 59.980
- 59.649
- 47.984
- 46.917
- 44.390
- 44.306
- 41.962
- 40.419
- 28.752
- 25.076
- 20.948
- 20.838
- 20.756
- 20.747
- 20.726
- 20.176
- 16.371
- 16.169
- 2.949
- 0.000

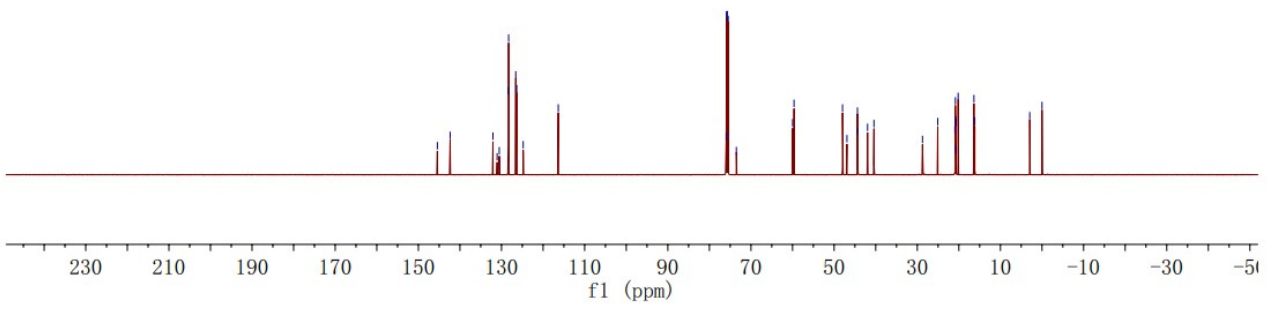

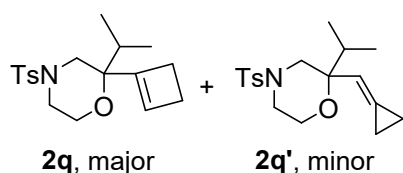

**Compound 2q'**: An inseparable mixture of **2q'** and **2q** in a 9.2:1 ratio determined by  $^1\text{H}$  NMR analysis; Yield: 57.2 mg, 86%; a yellow oil; Eluent: PE/EA = 10/1;  $^1\text{H}$  NMR (400 MHz,  $\text{CDCl}_3$ , TMS)  $\delta$  7.62 (d,  $J = 7.9$  Hz, 2H), 7.35 (d,  $J = 7.9$  Hz, 2H), 6.12 (s, 1H), 3.93 – 3.87 (m, 1H), 3.72 – 3.60 (m, 2H), 3.39 (d,  $J = 11.3$  Hz, 1H), 2.62 – 2.57 (m, 1H), 2.51 – 2.35 (m, 6H), 2.24 (d,  $J = 11.3$  Hz, 1H), 1.83 – 1.76 (m, 1H), 0.88 (d,  $J = 7.0$ , 3H), 0.85 (d,  $J = 7.0$ , 3H);  $^{13}\text{C}$  NMR (101 MHz,  $\text{CDCl}_3$ )  $\delta$  144.8, 142.3, 133.8, 131.0, 128.3, 126.3, 75.58, 59.8, 46.8, 44.2, 33.2, 28.8, 24.8, 20.1, 15.4, 15.3; IR (neat):  $\nu$  2912, 1588, 1447, 1346, 1323, 1165, 1091, 1088, 1065, 971, 955, 810, 751  $\text{cm}^{-1}$ ; HRMS (ESI-TOF) Calcd for  $\text{C}_{18}\text{H}_{25}\text{NO}_3\text{NaS}$   $[\text{M}+\text{Na}]^+$ : 358.14471, found: 358.1147; Enantiomeric excess was determined by HPLC with a Chiralpak IC column [ $\lambda = 254$  nm; eluent: Hexane/Isopropanol = 90/10; Flow rate: 1.0 mL/min;  $t_{\text{minor}} = 11.47$  min,  $t_{\text{major}} = 10.13$  min; ee% = 72%].

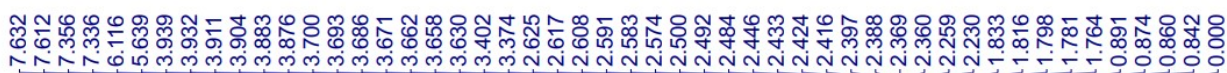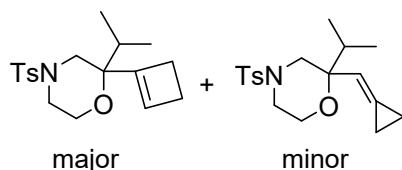

( $^1\text{H}$  NMR 400 MHz,  $\text{CDCl}_3$ )

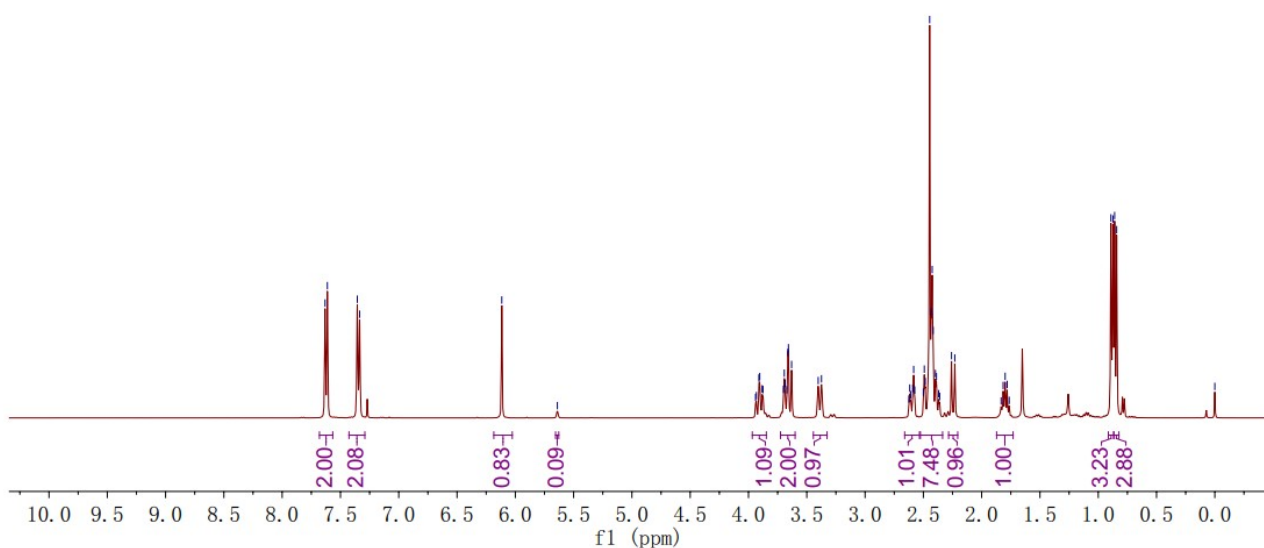

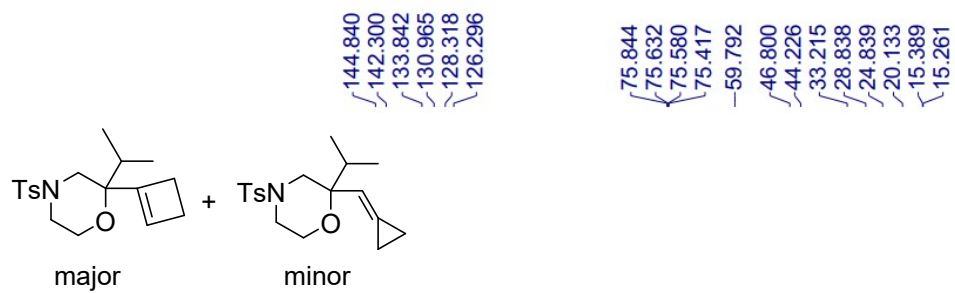

144.840  
 142.300  
 133.842  
 130.965  
 128.318  
 126.296

75.844  
 75.632  
 75.580  
 75.417  
 -59.792  
 46.800  
 44.226  
 33.215  
 28.838  
 24.839  
 20.133  
 15.389  
 15.261

(<sup>13</sup>C NMR 100 MHz, CDCl<sub>3</sub>)

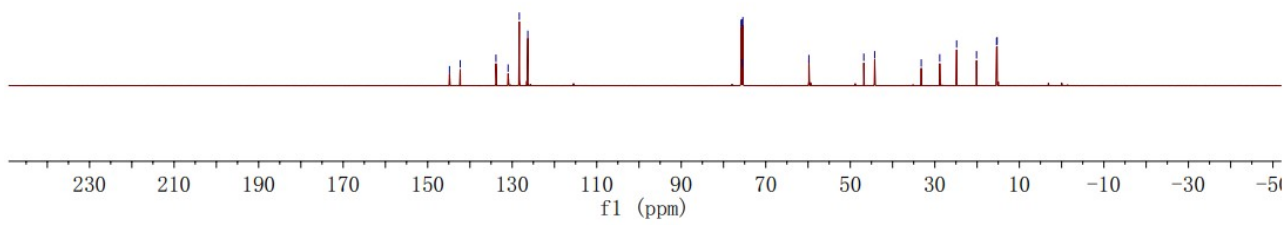



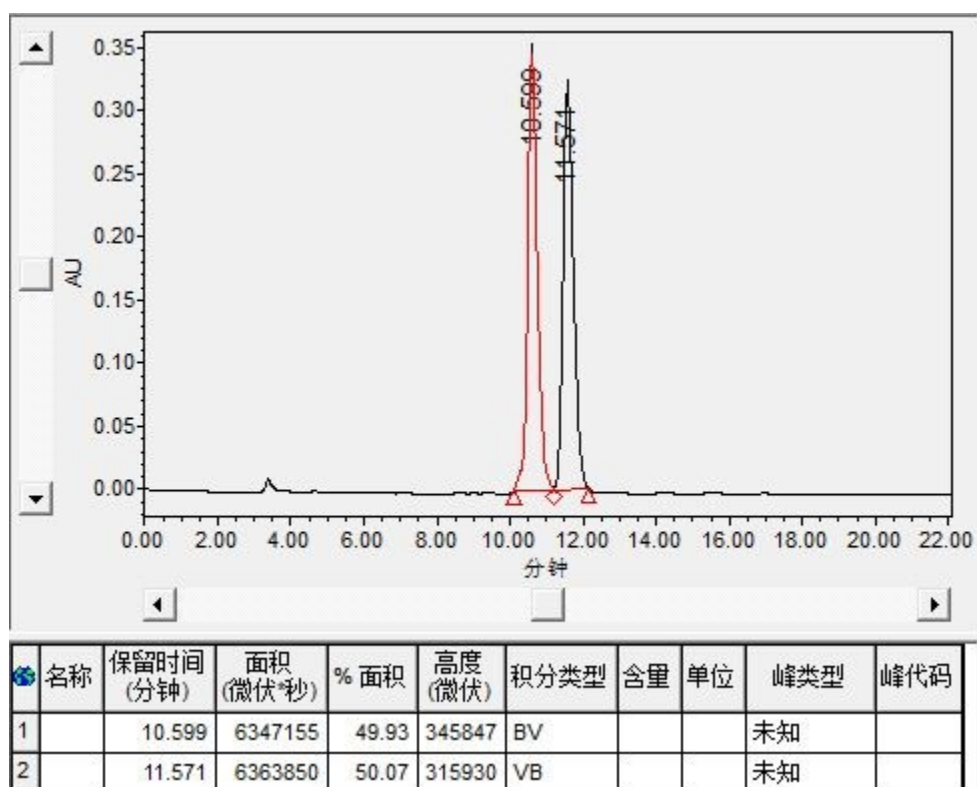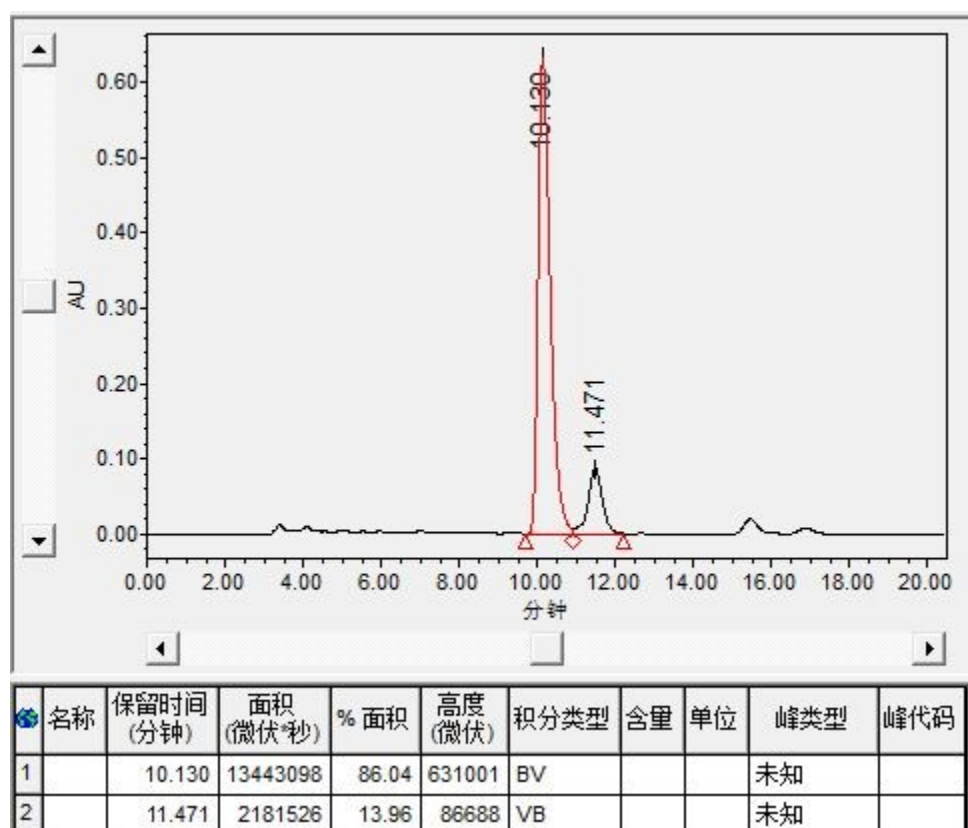

Translation : Enantiomeric excess was determined by HPLC with a Chiralpak IC column [ $\lambda = 254$  nm; eluent: Hexane/Isopropanol = 90/10; Flow rate: 1.0 mL/min;  $t_{minor} = 11.47$  min,  $t_{major} = 10.13$  min; ee% = 72%].

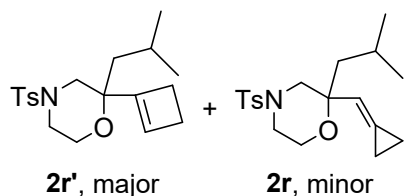

**Compound 2r'**: An inseparable mixture of **2r'** and **2r** in a 2:1 ratio determined by  $^1\text{H}$  NMR analysis; Yield: 47.4 mg, 68%; a yellow oil; Eluent: PE/EA = 10/1;  $^1\text{H}$  NMR (400 MHz,  $\text{CDCl}_3$ , TMS)  $\delta$  7.65 – 7.57 (m, 2H), 7.34 (d,  $J = 7.8$  Hz, 2H), 6.08 (s, 1H), 3.93 – 3.86 (m, 1H), 3.76 – 3.59 (m, 2H), 3.49 (d,  $J = 11.4$  Hz, 1H), 3.26 (d,  $J = 11.4$  Hz, 1H), 2.57 – 2.50 (m, 2H), 2.44 – 2.33 (m, 6H), 1.76 – 1.66 (m, 1H), 1.62 – 1.54 (m, 1H), 1.46 – 1.29 (m, 1H), 0.93 – 0.85 (m, 6H);  $^{13}\text{C}$  NMR (101 MHz,  $\text{CDCl}_3$ )  $\delta$  143.7, 133.3, 129.7, 127.7, 125.0, 119.9, 75.1, 60.8, 51.3, 45.6, 28.9, 26.0, 24.6, 24.0, 23.6, 21.5, 4.1, 1.2; IR (neat):  $\nu$  2922, 1568, 1467, 1445, 1345, 1175, 1061, 1057, 1032, 971, 945, 820, 771  $\text{cm}^{-1}$ ; HRMS (ESI-TOF) Calcd for  $\text{C}_{19}\text{H}_{27}\text{NO}_3\text{NaS}$   $[\text{M}+\text{Na}]^+$ : 372.16039, found: 372.16076.

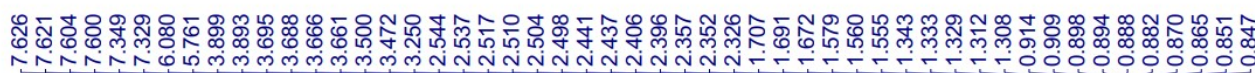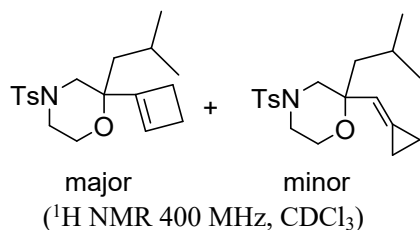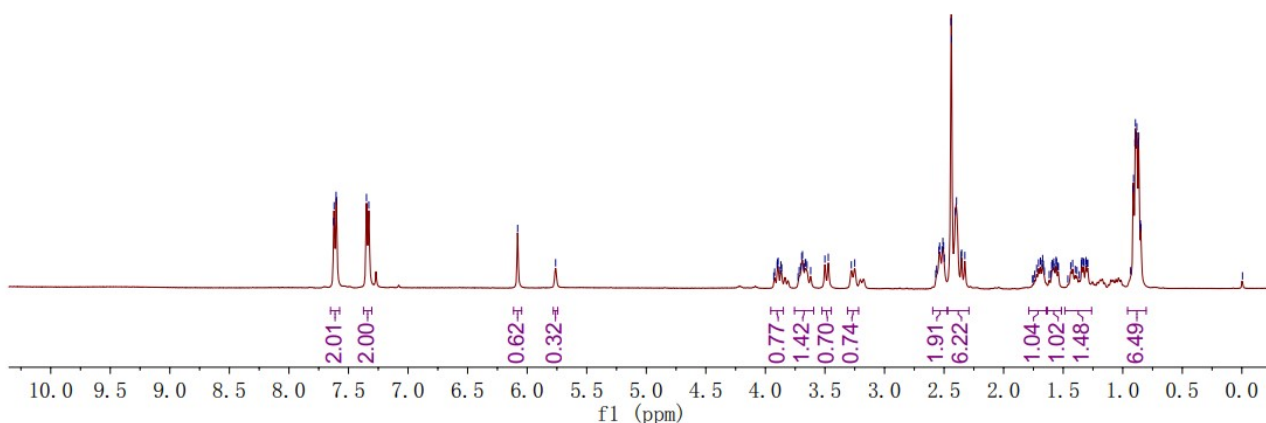

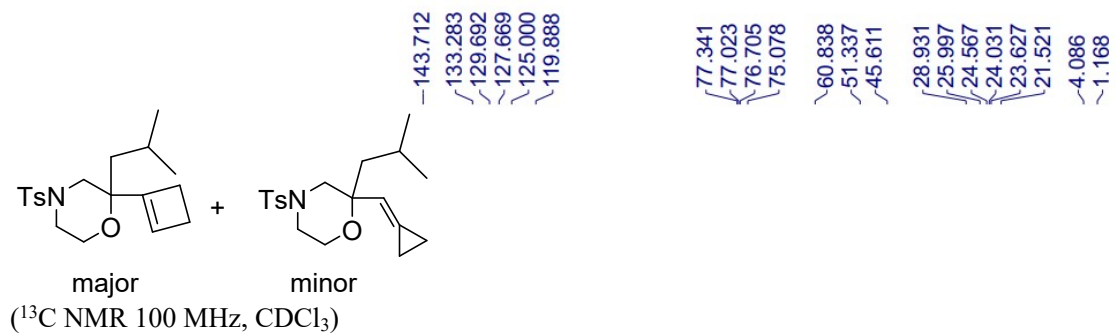

- 143.712
- 133.283
- 129.692
- 127.669
- 125.000
- 119.888
- 77.341
- 77.023
- 76.705
- 75.078
- 60.838
- 51.337
- 45.611
- 28.931
- 25.997
- 24.567
- 24.031
- 23.627
- 21.521
- 4.086
- 1.168

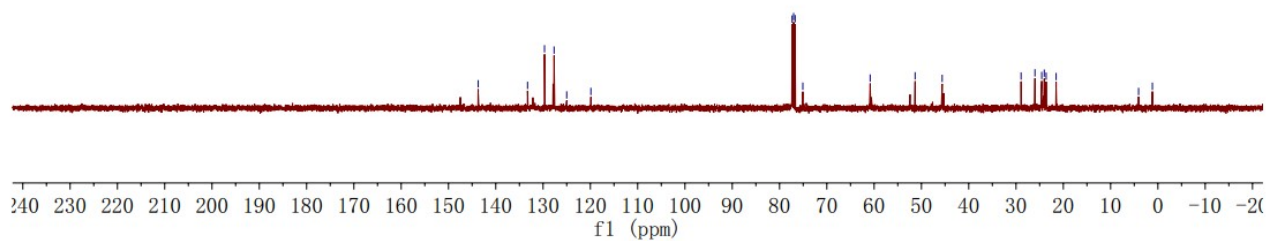

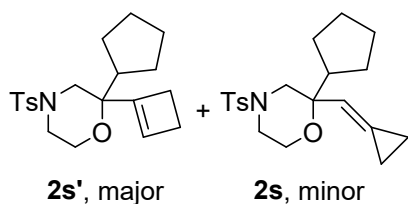

**Compound 2s'**: An inseparable mixture of **2s'** and **2s** in a 5:1 ratio determined by  $^1\text{H}$  NMR analysis; Yield: 52.7 mg, 76%; a yellow oil; Eluent: PE/EA = 10/1;  $^1\text{H}$  NMR (400 MHz,  $\text{CDCl}_3$ , TMS)  $\delta$  7.62 (d,  $J = 7.9$  Hz, 2H), 7.34 (d,  $J = 7.9$  Hz, 2H), 6.06 (s, 1H), 3.96 – 3.89 (m, 1H), 3.73 – 3.67 (m, 1H), 3.61 (d,  $J = 11.4$  Hz, 1H), 3.42 – 3.33 (m, 1H), 2.66 – 2.58 (m, 1H), 2.52 – 2.47 (m, 1H), 2.44 – 2.38 (m, 6H), 2.26 (d,  $J = 11.4$  Hz, 1H), 2.07 – 1.98 (m, 1H), 1.64 – 1.38 (m, 8H);  $^{13}\text{C}$  NMR (101 MHz,  $\text{CDCl}_3$ )  $\delta$  146.8, 143.7, 134.3, 132.3, 129.7, 127.7, 76.8, 61.2, 50.0, 46.3, 45.7, 30.6, 26.8, 26.39, 26.35, 25.8, 25.6, 21.5.; IR (neat):  $\nu$  2961, 2867, 1448, 1338, 1080, 973, 910, 811, 751, 751  $\text{cm}^{-1}$ ; HRMS (ESI-TOF) Calcd for  $\text{C}_{20}\text{H}_{27}\text{NO}_3\text{NaS}$   $[\text{M}+\text{Na}]^+$ : 384.16039, found: 384.16085.

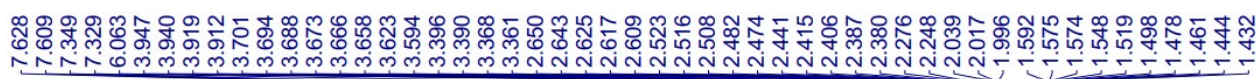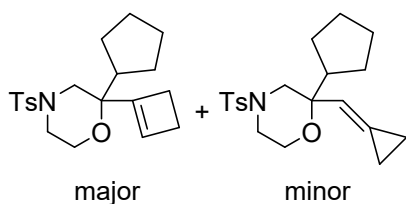

( $^1\text{H}$  NMR 400 MHz,  $\text{CDCl}_3$ )

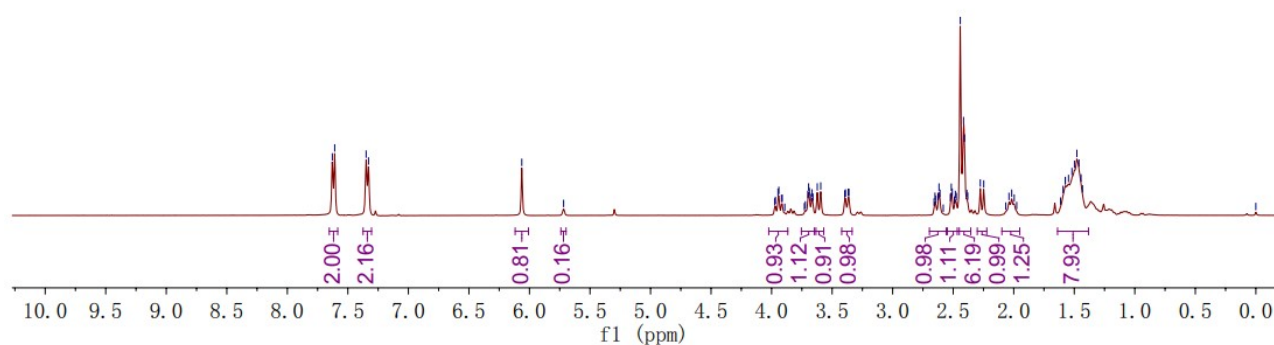

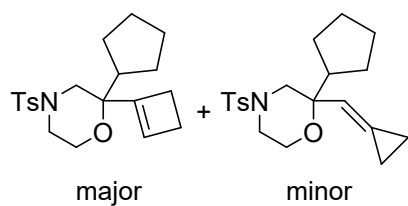

(<sup>13</sup>C NMR 100 MHz, CDCl<sub>3</sub>)

146.750  
 143.658  
 134.286  
 132.310  
 129.663  
 127.674

77.329  
 77.011  
 76.782  
 76.693  
 -61.171  
 49.951  
 46.347  
 45.675  
 30.556  
 26.826  
 26.390  
 26.352  
 25.768  
 25.643  
 21.501

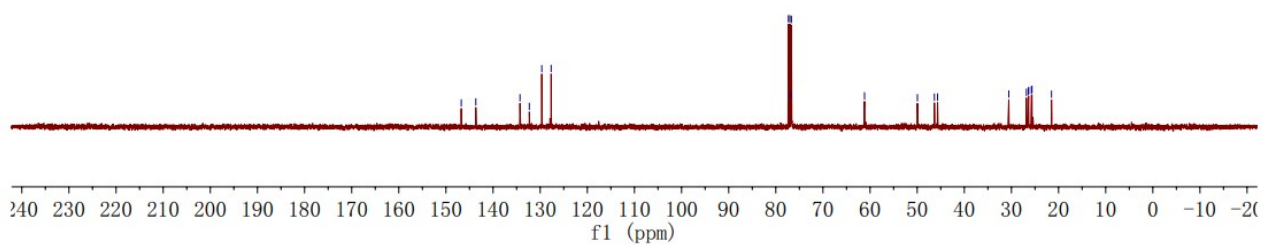

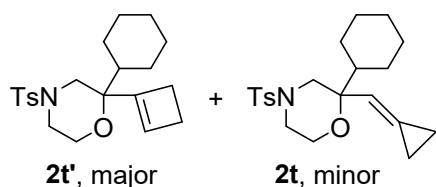

**Compound 2t'**: An inseparable mixture of **2t'** and **2t** in a 8.3:1 ratio determined by  $^1\text{H}$  NMR analysis; Yield: 52.5 mg, 70%; a yellow oil; Eluent: PE/EA = 10/1;  $^1\text{H}$  NMR (400 MHz,  $\text{CDCl}_3$ , TMS)  $\delta$  7.65 – 7.59 (m, 2H), 7.35 (d,  $J = 8.0$  Hz, 2H), 6.09 (s, 1H), 3.94 – 3.88 (m, 1H), 3.69 – 3.59 (m, 2H), 3.41 – 3.36 (m, 1H), 2.65 – 2.55 (m, 1H), 2.53 – 2.35 (m, 7H), 2.27 (d,  $J = 11.3$  Hz, 1H), 1.81 – 1.58 (m, 6H), 1.52 – 1.42 (m, 1H), 1.24 – 1.03 (m, 2H), 1.02 – 0.83 (m, 2H);  $^{13}\text{C}$  NMR (101 MHz,  $\text{CDCl}_3$ )  $\delta$  145.3, 142.3, 133.6, 131.0, 128.4, 126.3, 75.3, 47.1, 44.4, 43.7, 28.7, 25.52, 25.47, 25.23, 25.17, 24.8, 20.2; IR (neat):  $\nu$  2923, 2850, 2017, 1549, 1490, 1447, 1330, 1088, 1019, 980, 909, 813, 706  $\text{cm}^{-1}$ ; HRMS (ESI-TOF) Calcd for  $\text{C}_{21}\text{H}_{29}\text{NO}_3\text{NaS}$   $[\text{M}+\text{Na}]^+$ : 398.17604, found: 398.17590.

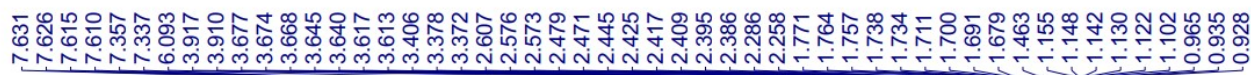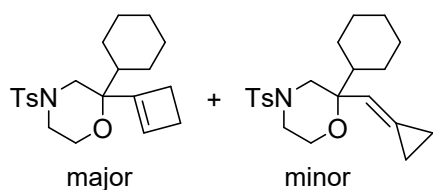

( $^1\text{H}$  NMR 400 MHz,  $\text{CDCl}_3$ )

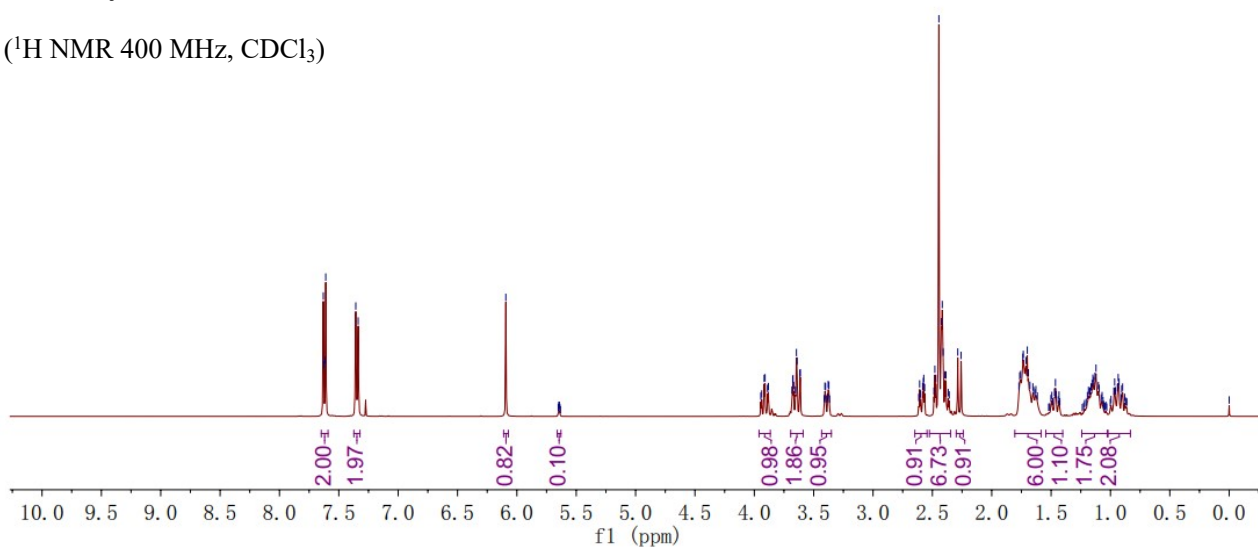

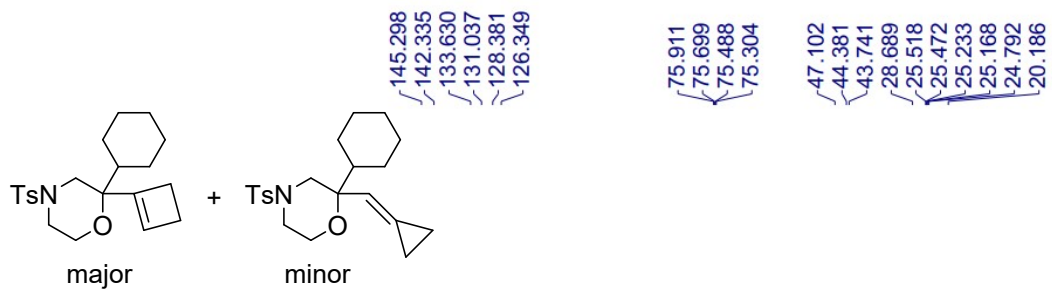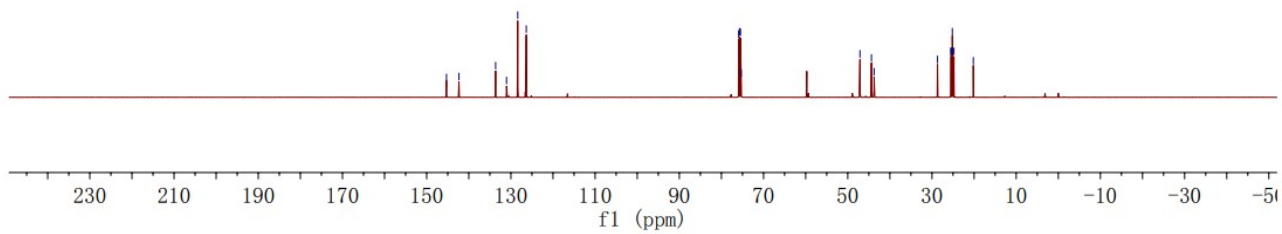

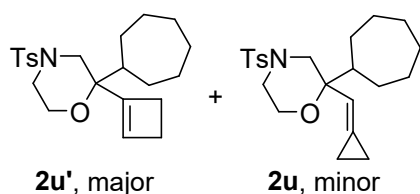

**Compound 2u'**: An inseparable mixture of **2u'** and **2u** in a 11.5:1 ratio determined by  $^1\text{H}$  NMR analysis; Yield: 66.1 mg, 85%; a yellow oil; Eluent: PE/EA = 10/1;  $^1\text{H}$  NMR (400 MHz,  $\text{CDCl}_3$ , TMS)  $\delta$  7.65 – 7.58 (m, 2H), 7.34 (d,  $J$  = 8.0 Hz, 2H), 6.14 (s, 1H), 3.91 – 3.85 (m, 1H), 3.72 – 3.61 (m, 2H), 3.40 – 3.35 (m, 1H), 2.59 – 2.49 (m, 1H), 2.49 – 2.37 (m, 7H), 2.27 (d,  $J$  = 11.4 Hz, 1H), 1.87 – 1.04 (m, 13H);  $^{13}\text{C}$  NMR (101 MHz,  $\text{CDCl}_3$ )  $\delta$  145.1, 142.2, 134.0, 131.0, 128.3, 126.2, 59.7, 46.6, 44.3, 44.2, 28.4, 26.8, 26.7, 26.6, 26.5, 26.3, 26.0, 24.8, 20.1; IR (neat):  $\nu$  2920, 2853, 2017, 1594, 1445, 1330, 1305, 1088, 1044, 991, 909, 888, 755, 662  $\text{cm}^{-1}$ ; HRMS (ESI-TOF) Calcd for  $\text{C}_{22}\text{H}_{31}\text{NO}_2\text{NaS}$   $[\text{M}+\text{Na}]^+$ : 412.19169, found: 412.19143.

7.626  
7.621  
7.610  
7.606  
7.354  
7.334  
6.140  
3.889  
3.882  
3.688  
3.665  
3.660  
3.634  
3.630  
3.368  
2.524  
2.521  
2.479  
2.471  
2.444  
2.419  
2.409  
2.398  
2.284  
2.256  
2.256  
1.724  
1.716  
1.673  
1.667  
1.644  
1.626  
1.618  
1.609  
1.512  
1.506  
1.499  
1.495  
1.487  
1.476  
1.466  
1.461  
1.455  
1.451  
1.442  
1.429  
1.424  
1.162  
1.153  
1.128  
1.119  
1.104

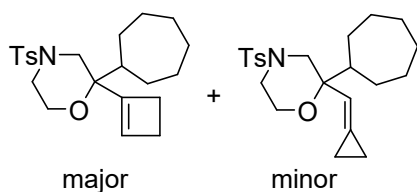

( $^1\text{H}$  NMR 400 MHz,  $\text{CDCl}_3$ )

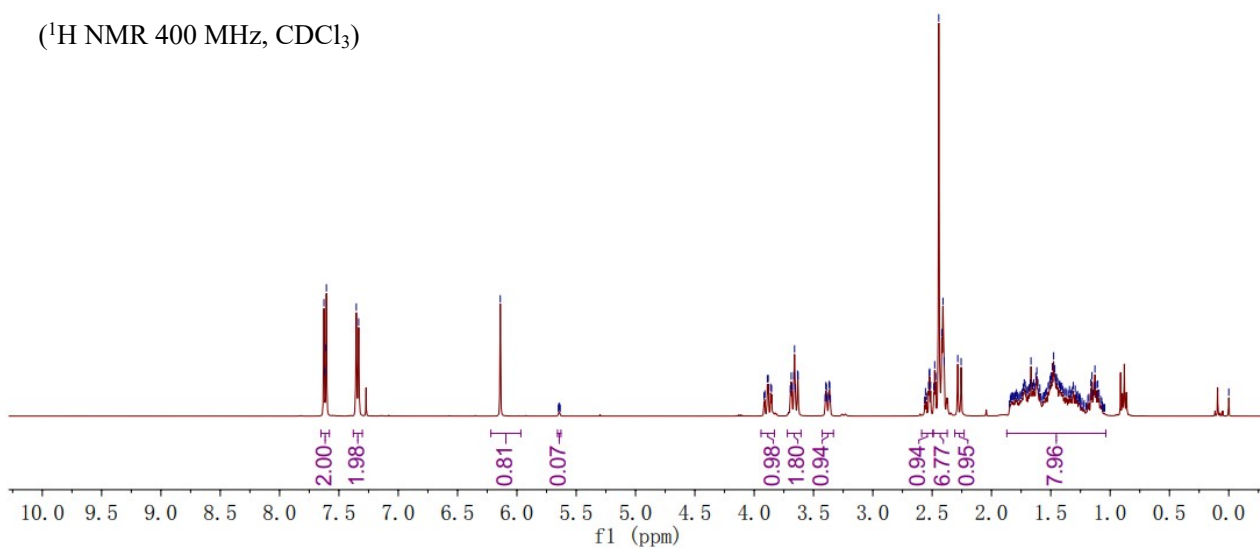



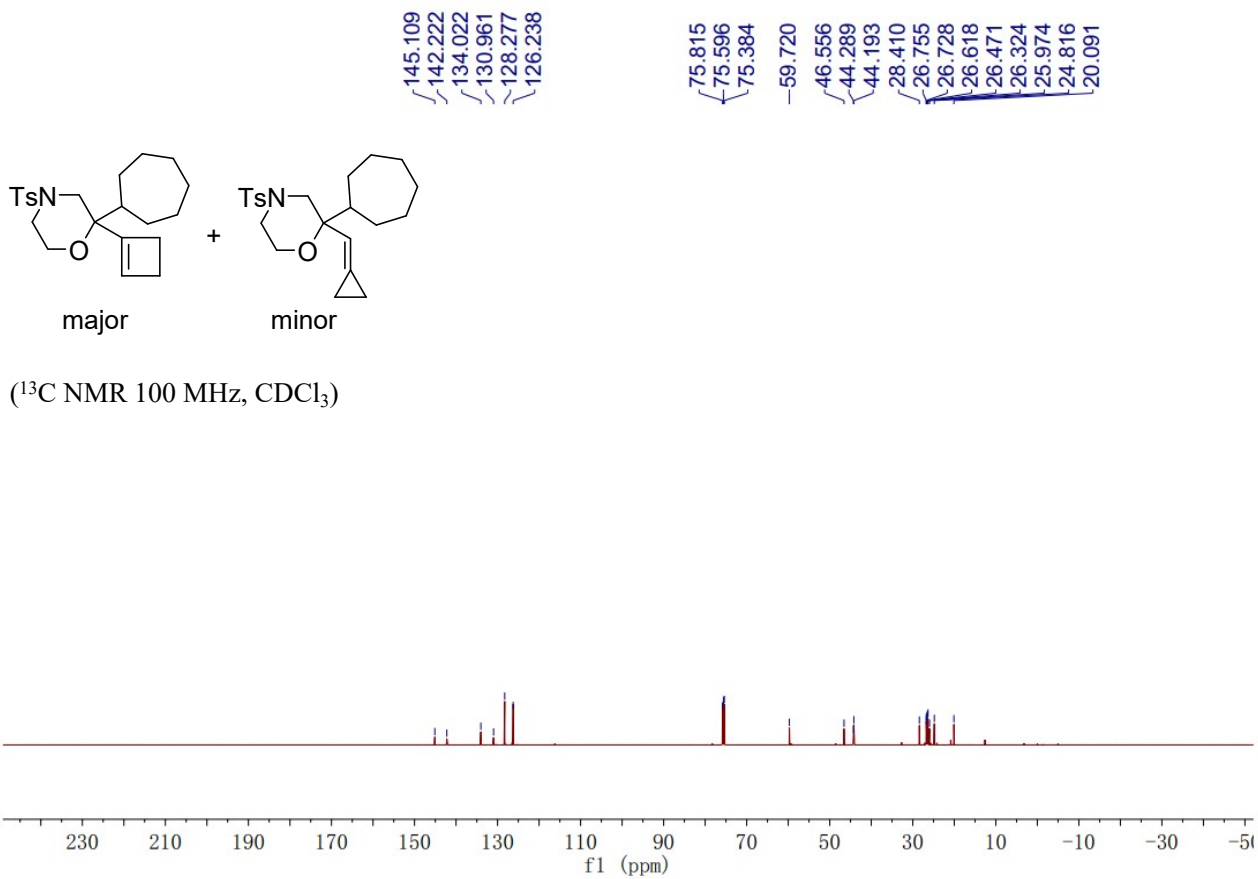

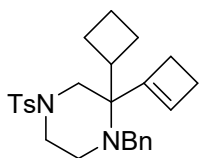

**Compound 2v'**: Yield: 54.9 mg, 63%; a yellow oil; Eluent: PE/EA = 10/1;  $^1\text{H}$  NMR (400 MHz,  $\text{CDCl}_3$ , TMS)  $\delta$  7.65 – 7.56 (m, 2H), 7.33 (d,  $J = 7.9$  Hz, 2H), 7.28 – 7.12 (m, 5H), 6.04 (s, 1H), 3.76 (d,  $J = 13.8$  Hz, 1H), 3.54 (d,  $J = 10.8$  Hz, 1H), 3.36 (d,  $J = 13.8$  Hz, 1H), 3.23 – 3.07 (m, 1H), 3.01 – 2.97 (m, 1H), 2.64 – 2.38 (m, 8H), 2.13 – 2.04 (m, 1H), 1.90 – 1.77 (m, 5H), 1.69 – 1.62 (m, 1H), 1.53 – 1.49 (m, 1H), 1.33 – 1.25 (m, 1H);  $^{13}\text{C}$  NMR (101 MHz,  $\text{CDCl}_3$ )  $\delta$  143.5, 139.9, 132.1, 129.6, 128.3, 128.2, 127.9, 126.8, 126.0, 115.2, 61.8, 53.7, 51.0, 46.5, 45.6, 41.5, 25.7, 24.0, 21.6, 18.5, 5.4, 1.5; IR (neat):  $\nu$  2977, 2849, 2256, 1598, 1493, 1345, 1164, 1105, 1021, 967, 815, 727, 649, 599, 547  $\text{cm}^{-1}$ ; HRMS (ESI-TOF) Calcd for  $\text{C}_{26}\text{H}_{33}\text{N}_2\text{O}_2\text{S}$   $[\text{M}+\text{H}]^+$ : 437.22573, found: 437.22513.

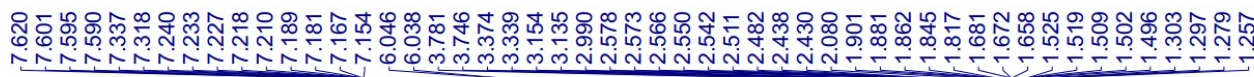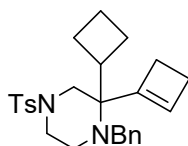

( $^1\text{H}$  NMR 400 MHz,  $\text{CDCl}_3$ )

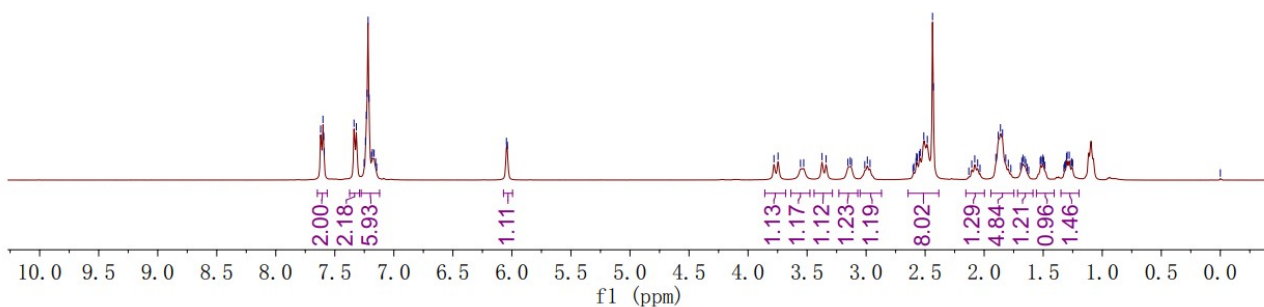

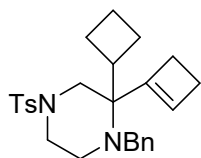

143.494  
139.945  
132.135  
129.637  
128.326  
128.188  
127.925  
126.757  
126.029  
115.173  
77.446  
77.131  
76.810  
61.753  
53.687  
51.033  
46.450  
45.564  
41.504  
25.656  
24.038  
21.610  
18.510  
-5.396  
-1.478

( $^{13}\text{C}$  NMR 100 MHz,  $\text{CDCl}_3$ )

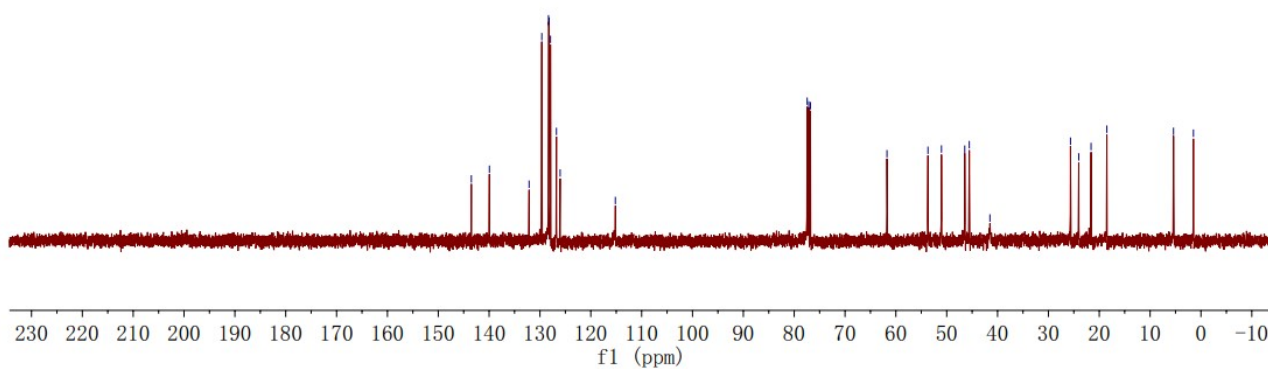

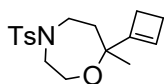

**Compound 2w'**: Yield: 56.5 mg, 88%; a yellow oil; Eluent: PE/EA = 10/1;  $^1\text{H}$  NMR (400 MHz,  $\text{CDCl}_3$ , TMS)  $\delta$  7.66 – 7.63 (m, 2H), 7.32 (d,  $J$  = 7.8 Hz, 2H), 5.83 (s, 1H), 3.82 – 3.62 (m, 2H), 3.59 – 3.37 (m, 2H), 3.14 – 2.93 (m, 2H), 2.44 – 2.42 (m, 5H), 2.33 – 2.27 (m, 2H), 2.24 – 2.18 (m, 1H), 1.92 – 1.86 (m, 1H), 1.15 (s, 3H);  $^{13}\text{C}$  NMR (101 MHz,  $\text{CDCl}_3$ )  $\delta$  152.1, 143.3, 134.9, 129.7, 128.6, 127.2, 75.9, 63.3, 51.1, 43.5, 37.7, 27.9, 25.41, 25.38, 21.5; IR (neat):  $\nu$  2965, 2847, 2357, 1597, 1453, 1353, 1161, 1128, 990, 947, 864, 771, 656  $\text{cm}^{-1}$ ; HRMS (ESI-TOF) Calcd for  $\text{C}_{17}\text{H}_{23}\text{NO}_3\text{NaS}$   $[\text{M}+\text{Na}]^+$ : 344.1296, found: 344.1298.

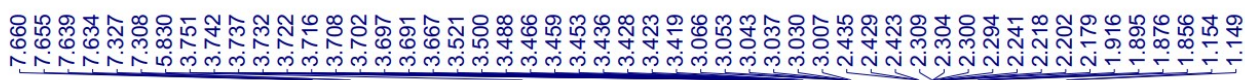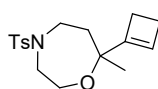

( $^1\text{H}$  NMR 400 MHz,  $\text{CDCl}_3$ )

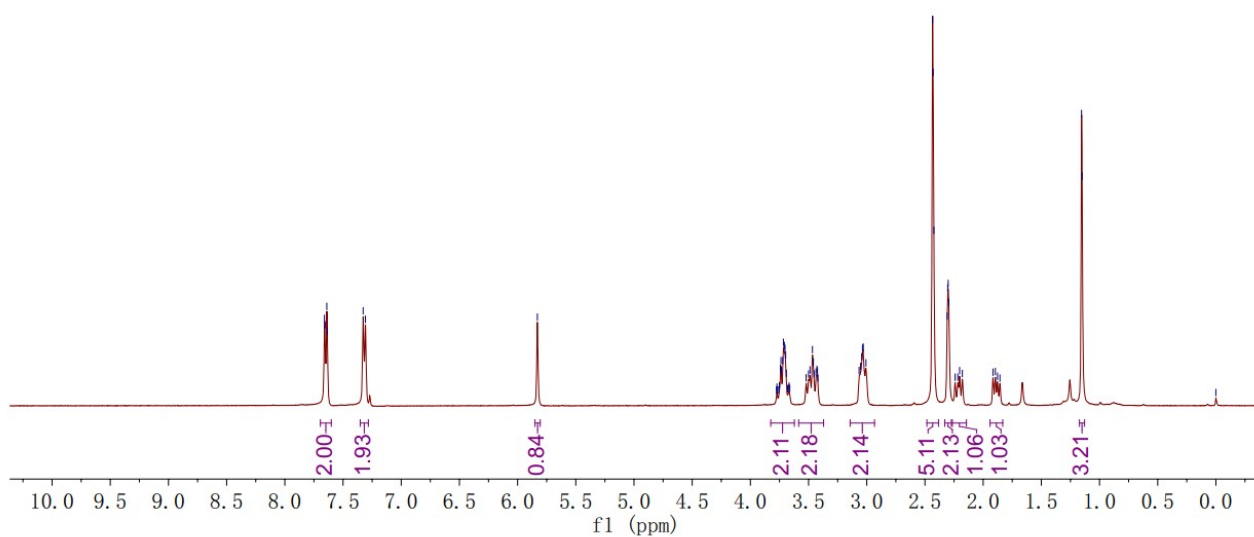

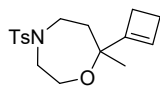

152.066  
143.312  
134.932  
129.676  
128.580  
127.221  
77.334  
77.017  
76.698  
75.863  
63.256  
51.069  
43.450  
37.749  
27.919  
25.406  
25.382  
21.488

(<sup>13</sup>C NMR 100 MHz, CDCl<sub>3</sub>)

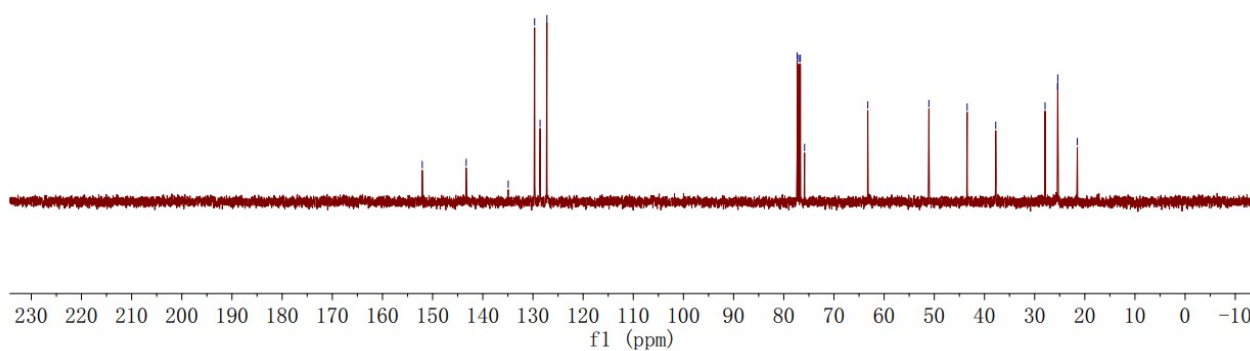

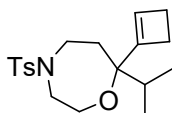

**Compound 2x'**: Yield: 49.0 mg, 70%; A colorless solid; Mp: 116 – 118 °C; Eluent: PE/EA = 10/1; <sup>1</sup>H NMR (400 MHz, CDCl<sub>3</sub>, TMS) δ 7.68 – 7.62 (m, 2H), 7.31 (d, *J* = 8.0 Hz, 2H), 5.86 (s, 1H), 3.75 – 3.73 (m, 2H), 3.38 – 3.27 (m, 2H), 3.24 – 3.13 (m, 2H), 2.44 – 2.41 (m, 5H), 2.31 – 2.30 (m, 2H), 2.09 – 1.94 (m, 2H), 1.83 – 1.74 (m, 1H), 0.88 – 0.81 (m, 6H); <sup>13</sup>C NMR (101 MHz, CDCl<sub>3</sub>) δ 150.6, 143.2, 135.5, 131.9, 129.7, 127.2, 81.5, 63.4, 51.0, 44.3, 35.4, 33.7, 29.8, 25.5, 21.5, 17.7, 17.3; IR (neat): ν 2956, 1460, 1356, 1333, 1163, 1105, 1074, 978, 889, 811, 713 cm<sup>-1</sup>; HRMS (ESI-TOF) Calcd for C<sub>19</sub>H<sub>27</sub>NO<sub>3</sub>NaS [M+Na]<sup>+</sup>: 372.16039, found: 372.15994.

7.658  
7.654  
7.643  
7.637  
7.319  
7.299  
5.863  
3.751  
3.743  
3.738  
3.729  
3.355  
3.352  
3.336  
3.333  
3.325  
3.319  
3.302  
3.294  
3.285  
3.232  
3.227  
3.210  
3.206  
3.198  
3.187  
3.173  
3.167  
3.154  
3.154  
2.444  
2.428  
2.420  
2.412  
2.405  
2.312  
2.305  
2.297  
2.047  
2.043  
2.043  
2.025  
2.021  
1.998  
1.994  
1.978  
1.974  
1.793  
1.775  
1.758  
0.846  
0.830  
0.813

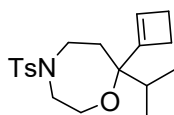

(<sup>1</sup>H NMR 400 MHz, CDCl<sub>3</sub>)

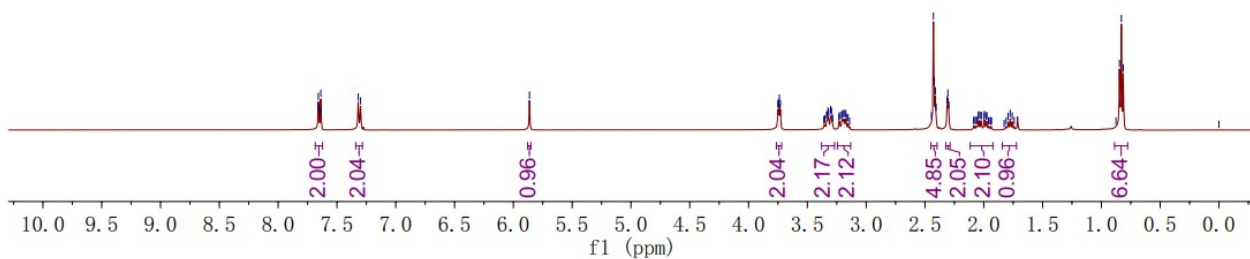

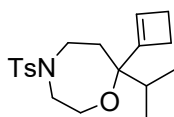

(<sup>13</sup>C NMR 100 MHz, CDCl<sub>3</sub>)

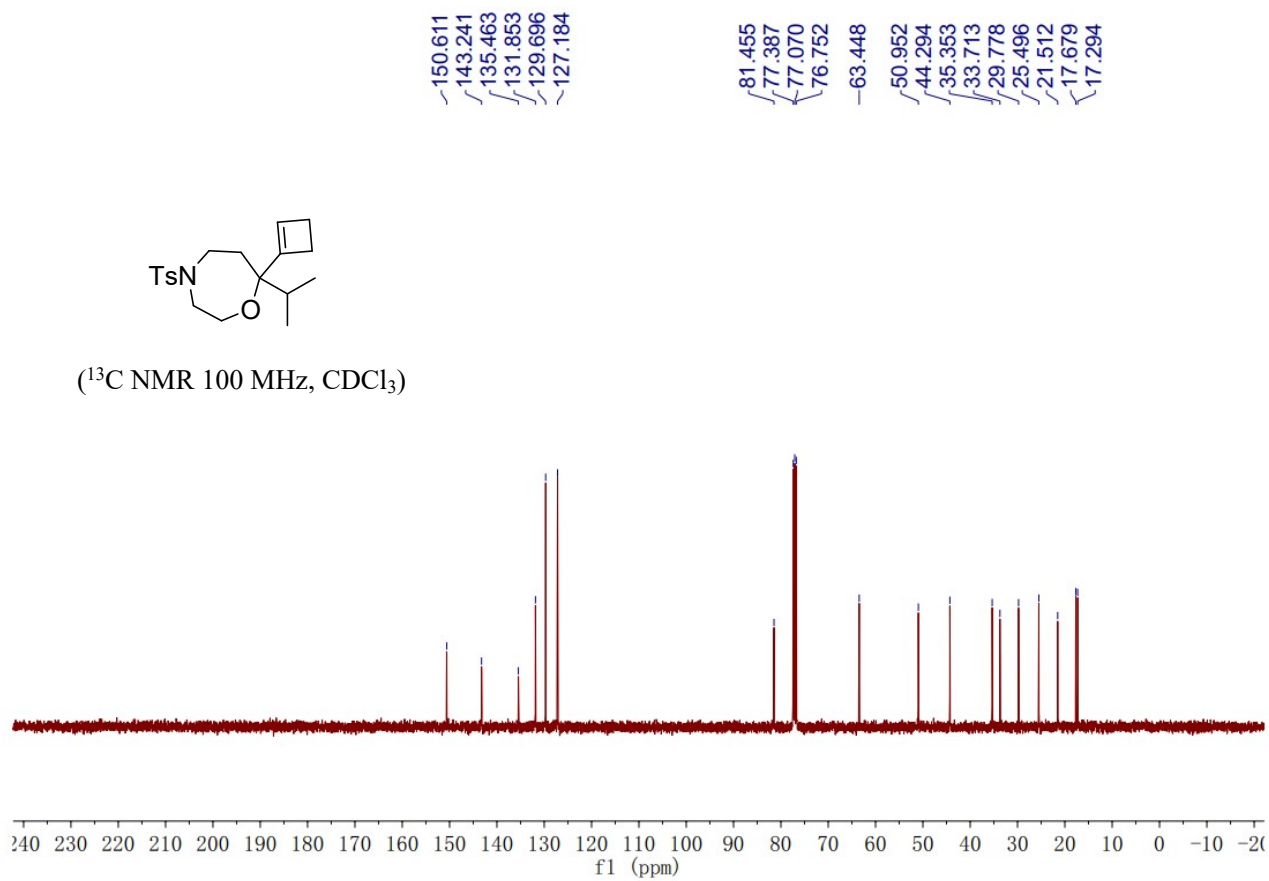

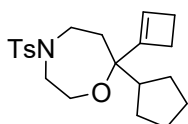

**Compound 2y'**: Yield: 49.9 mg, 67%; A colorless solid; Mp: 125 – 127 °C; Eluent: PE/EA = 10/1; <sup>1</sup>H NMR (400 MHz, CDCl<sub>3</sub>, TMS) δ 7.68 – 7.62 (m, 2H), 7.31 (d, *J* = 8.0 Hz, 2H), 5.84 (s, 1H), 3.77 – 3.74 (m, 2H), 3.47 – 3.33 (m, 2H), 3.25 – 3.05 (m, 2H), 2.45 – 2.40 (m, 5H), 2.36 – 2.22 (m, 2H), 2.14 – 1.93 (m, 3H), 1.63 – 1.15 (m, 8H); <sup>13</sup>C NMR (101 MHz, CDCl<sub>3</sub>) δ 150.9, 143.3, 135.4, 131.3, 129.7, 127.2, 81.0, 63.6, 51.1, 48.0, 44.0, 35.7, 30.2, 27.6, 27.2, 25.8, 25.6, 25.5, 21.5; IR (neat): ν 2929, 1448, 1356, 1337, 1115, 1029, 888, 711, 668 cm<sup>-1</sup>; HRMS (ESI-TOF) Calcd for C<sub>21</sub>H<sub>29</sub>NO<sub>3</sub>NaS [M+Na]<sup>+</sup>: 398.17604, found: 398.17624.

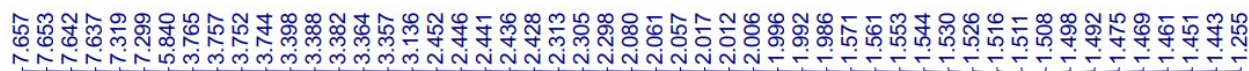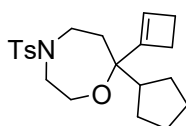

(<sup>1</sup>H NMR 400 MHz, CDCl<sub>3</sub>)

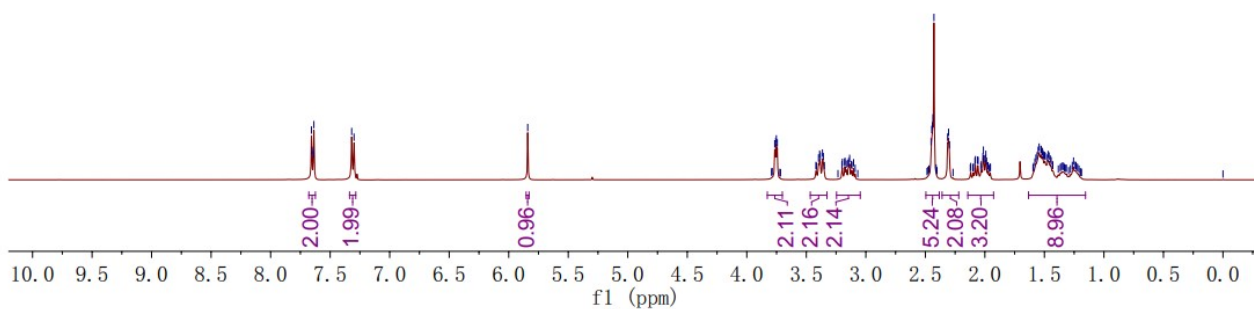



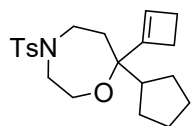

(<sup>13</sup>C NMR 100 MHz, CDCl<sub>3</sub>)

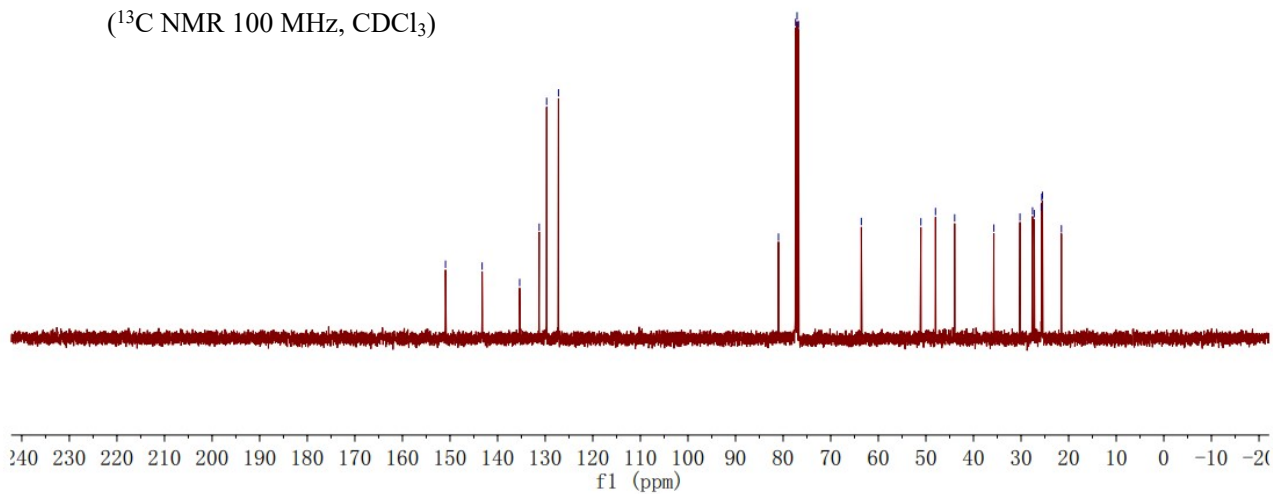

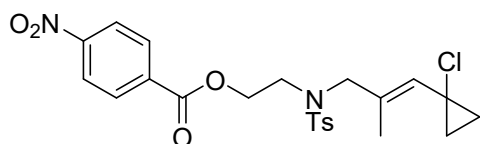

**Compound 3:** Yield: 77.0 mg, 78% for two steps; A colorless solid; Mp: 245 – 248 °C; Eluent: PE/EA = 2/1;  $^1\text{H}$  NMR (400 MHz,  $\text{CDCl}_3$ , TMS)  $\delta$  8.33 – 8.25 (m, 2H), 8.25 – 8.18 (m, 2H), 7.72 – 7.65 (m, 2H), 7.28 (d,  $J = 8.2$  Hz, 2H), 5.75 (s, 1H), 4.42 (t,  $J = 5.9$  Hz, 2H), 3.71 (s, 2H), 3.46 (t,  $J = 5.9$  Hz, 2H), 2.41 (s, 3H), 1.87 (d,  $J = 1.4$  Hz, 3H), 1.25 – 1.18 (m, 2H), 0.92 – 0.86 (m, 2H);  $^{13}\text{C}$  NMR (100 MHz,  $\text{CDCl}_3$ , TMS)  $\delta$  164.4, 150.6, 143.6, 139.5, 136.2, 135.2, 130.9, 129.8, 129.4, 127.1, 123.5, 62.9, 56.3, 46.5, 37.6, 26.9, 21.5, 17.2, 15.3; IR (neat):  $\nu$  2927, 2853, 1724, 1594, 1529, 1459, 1161, 1088, 996, 712, 657  $\text{cm}^{-1}$ ; HRMS (ESI-TOF) Calcd for  $\text{C}_{23}\text{H}_{25}\text{N}_2\text{O}_6\text{NaCl}$   $[\text{M}+\text{Na}]^+$ : 515.10141, found: 515.10144.

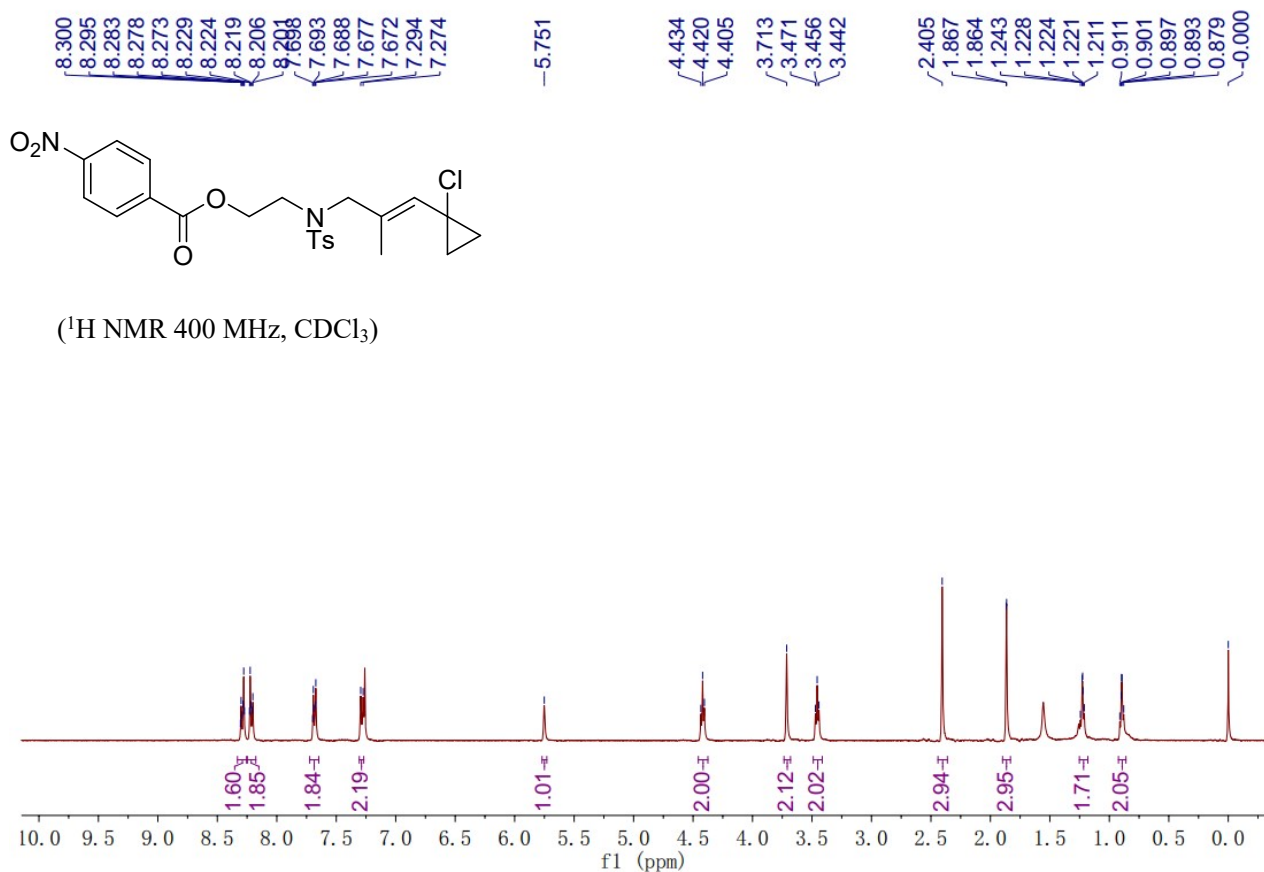

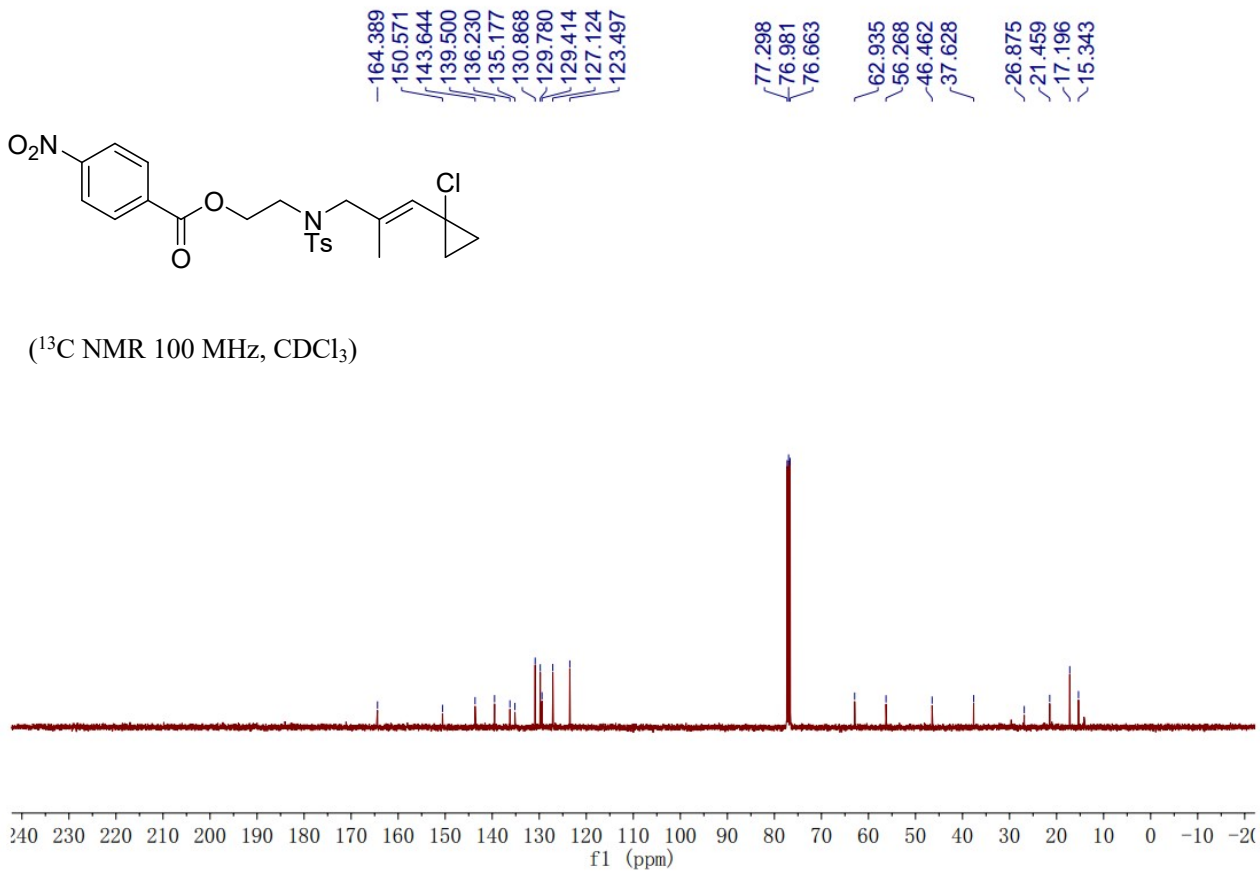

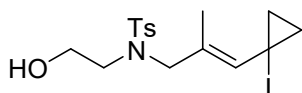

**Compound 4:** Yield: 29.1 mg, 67%; A yellow oil; Eluent: PE/EA = 1/1;  $^1\text{H}$  NMR (400 MHz,  $\text{CDCl}_3$ , TMS)  $\delta$  7.69 (d,  $J = 8.0$  Hz, 2H), 7.32 (d,  $J = 8.0$  Hz, 2H), 5.71 (s, 1H), 3.67 – 3.64 (m, 4H), 3.13 (t,  $J = 5.4$  Hz, 2H), 2.44 (s, 3H), 1.80 (s, 3H), 1.23 – 1.20 (m, 2H), 0.93 – 0.90 (m, 2H);  $^{13}\text{C}$  NMR (100 MHz,  $\text{CDCl}_3$ , TMS)  $\delta$  143.7, 137.7, 135.8, 133.7, 129.8, 127.2, 61.0, 56.9, 50.5, 21.6, 19.2, 15.5; IR (neat):  $\nu$  3525, 2956, 2922, 2849, 1599, 1450, 1335, 1088, 991, 815, 753  $\text{cm}^{-1}$ ; HRMS (ESI-TOF) Calcd for  $\text{C}_{16}\text{H}_{22}\text{NO}_3\text{NaSI}$   $[\text{M}+\text{Na}]^+$ : 458.02573, found: 458.02661.

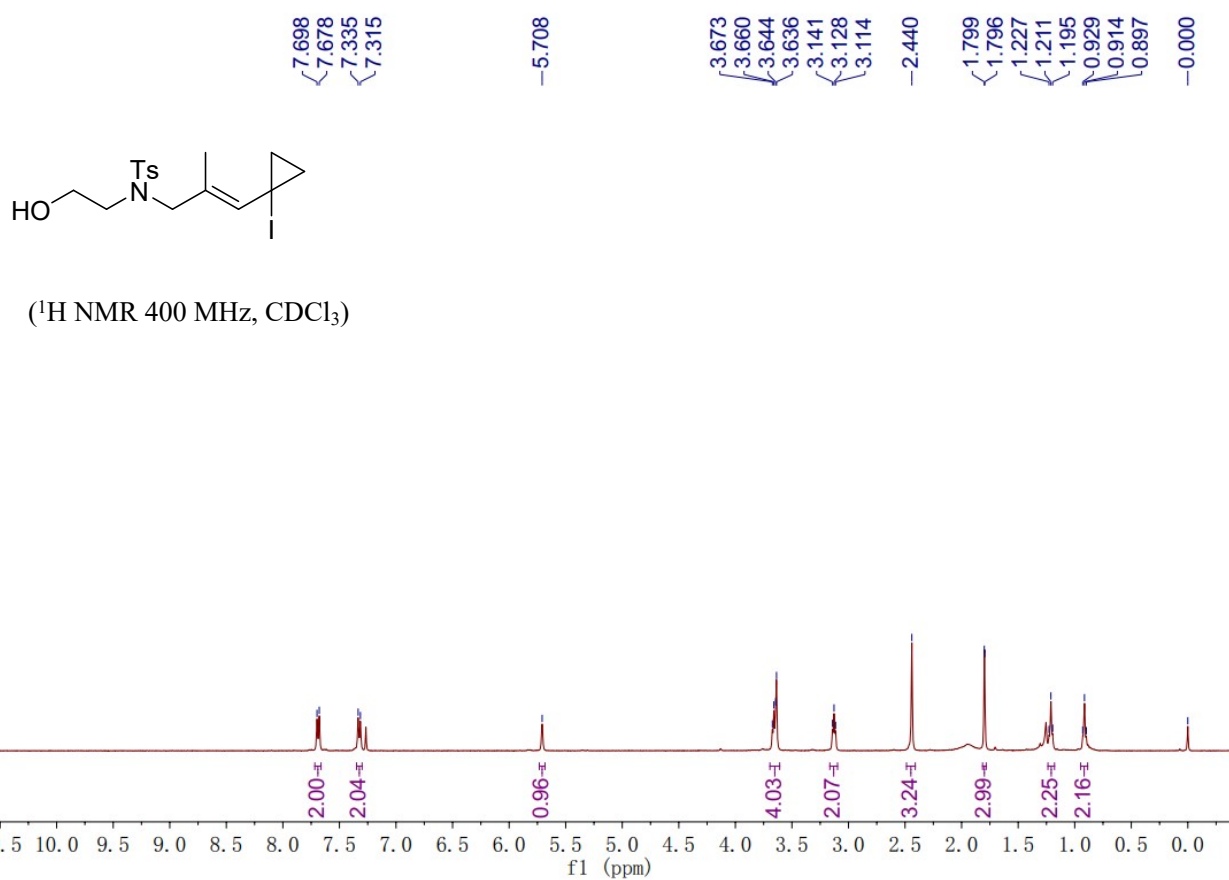

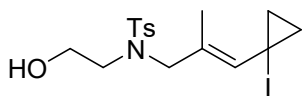

(<sup>13</sup>C NMR 100 MHz, CDCl<sub>3</sub>)

143.681  
137.718  
135.751  
133.716  
129.842  
127.211

77.424  
77.104  
76.782

61.039  
56.902  
50.452

21.570  
19.219  
15.546

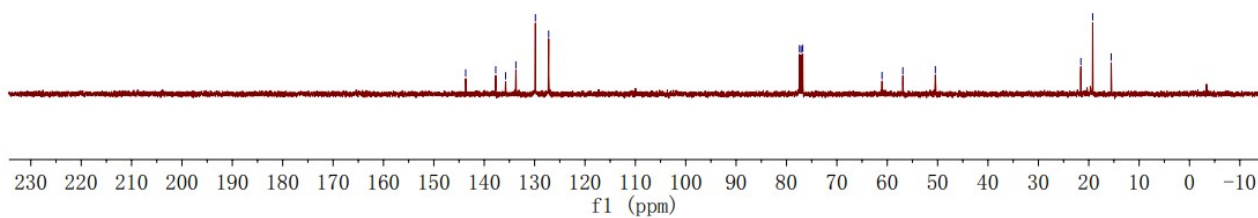

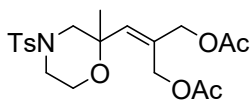

**Compound 5:** Yield: 17.5 mg, 42%; A colorless oil; Eluent: PE/EA = 2/1;  $^1\text{H}$  NMR (400 MHz,  $\text{CDCl}_3$ , TMS)  $\delta$  7.62 (d,  $J = 7.9$  Hz, 2H), 7.35 (d,  $J = 7.9$  Hz, 2H), 5.77 (s, 1H), 4.93 (d,  $J = 12.7$  Hz, 1H), 4.86 (d,  $J = 12.7$  Hz, 1H), 4.65 (d,  $J = 12.9$  Hz, 1H), 4.55 (d,  $J = 12.9$  Hz, 1H), 3.87 – 3.71 (m, 1H), 3.71 – 3.58 (m, 1H), 3.37 – 3.32 (m, 2H), 2.60 – 2.47 (m, 1H), 2.45 (s, 3H), 2.28 (d,  $J = 11.3$  Hz, 1H), 2.11 (s, 3H), 2.05 (s, 3H), 1.32 (s, 3H);  $^{13}\text{C}$  NMR (100 MHz,  $\text{CDCl}_3$ , TMS)  $\delta$  170.6, 170.5, 144.0, 134.1, 133.8, 132.1, 129.8, 127.7, 73.6, 65.6, 60.7, 59.5, 55.9, 45.4, 25.3, 21.5, 20.9, 20.8; IR (neat):  $\nu$  2974, 2846, 1735, 1591, 1450, 1350, 1132, 1023, 919, 757, 657  $\text{cm}^{-1}$ ; HRMS (ESI-TOF) Calcd for  $\text{C}_{20}\text{H}_{27}\text{NO}_7\text{NaS}$   $[\text{M}+\text{Na}]^+$ : 448.14004, found: 448.14025.

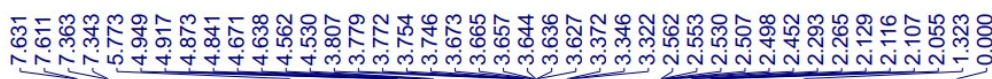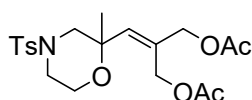

( $^1\text{H}$  NMR 400 MHz,  $\text{CDCl}_3$ )

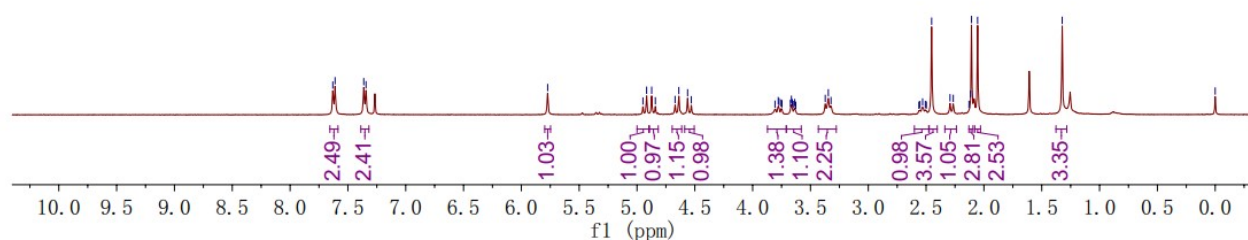

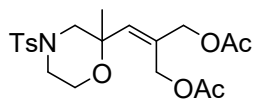

(<sup>13</sup>C NMR 100 MHz, CDCl<sub>3</sub>)

170.640  
170.508

143.972  
134.135  
133.839  
132.133  
129.779  
127.692

77.408  
77.089  
76.770  
73.597  
65.605  
60.683  
59.492  
55.878  
45.404

25.285  
21.504  
20.882  
20.760

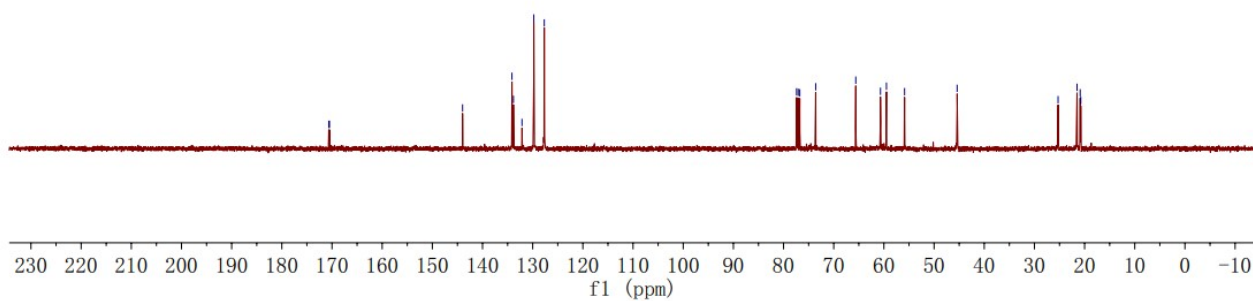

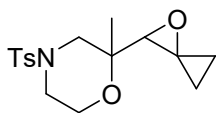

**Compound 6:** Yield: 20.9 mg, 68%; A colorless oil; Eluent: PE/EA = 2/1; The diastereomer ratio was 3:1, which was determined by  $^1\text{H}$  NMR analysis.  $^1\text{H}$  NMR (400 MHz,  $\text{CDCl}_3$ , TMS, detectable signals of minor diastereomer are marked with an asterisk)  $\delta$  7.61 (d,  $J = 7.9$  Hz, 2H), 7.38 – 7.30 (m, 2H), 4.00 – 3.74 (m, 2H), 3.60 (s, 1H), 3.58\* (s, 1H), 3.30\* (d,  $J = 11.4$  Hz, 1H), 3.11\* (d,  $J = 11.4$  Hz, 1H), 3.03 – 2.98 (m, 1H), 2.94 – 2.83 (m, 1H), 2.79 (d,  $J = 11.4$  Hz, 1H), 2.67 (d,  $J = 11.4$  Hz, 1H), 2.44 (s, 3H), 1.31\* (s, 3H), 1.29 (s, 3H), 1.16 – 0.85 (m, 4H);  $^{13}\text{C}$  NMR (100 MHz,  $\text{CDCl}_3$ , TMS, mixture of diastereomers.)  $\delta$  144.0, 143.9, 132.1, 131.7, 129.8, 127.8, 127.7, 73.1, 72.8, 62.1, 61.6, 60.5, 56.6, 55.4, 50.5, 50.5, 45.5, 45.4, 21.5, 19.2, 18.0, 3.7, 3.0, 2.5, 2.2; IR (neat):  $\nu$  2982, 2930, 2251, 1591, 1351, 1164, 1088, 1010, 987, 861, 727  $\text{cm}^{-1}$ ; HRMS (ESI-TOF) Calcd for  $\text{C}_{16}\text{H}_{21}\text{NO}_4\text{NaS}$   $[\text{M}+\text{Na}]^+$ : 346.10385, found: 346.10869.

7.620  
7.601  
7.357  
7.341  
7.330  
3.919  
3.913  
3.886  
3.877  
3.869  
3.860  
3.850  
3.845  
3.836  
3.815  
3.806  
3.784  
3.776  
3.600  
3.583  
3.314  
3.285  
3.120  
3.091  
3.031  
3.020  
3.003  
2.989  
2.979  
2.912  
2.905  
2.888  
2.860  
2.806  
2.778  
2.683  
2.654  
2.443  
1.312  
1.294  
1.109  
1.093  
1.081  
1.061  
1.044  
1.029  
1.014  
1.002  
0.982  
0.967  
0.952

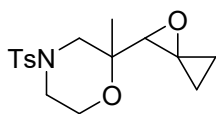

( $^1\text{H}$  NMR 400 MHz,  $\text{CDCl}_3$ )

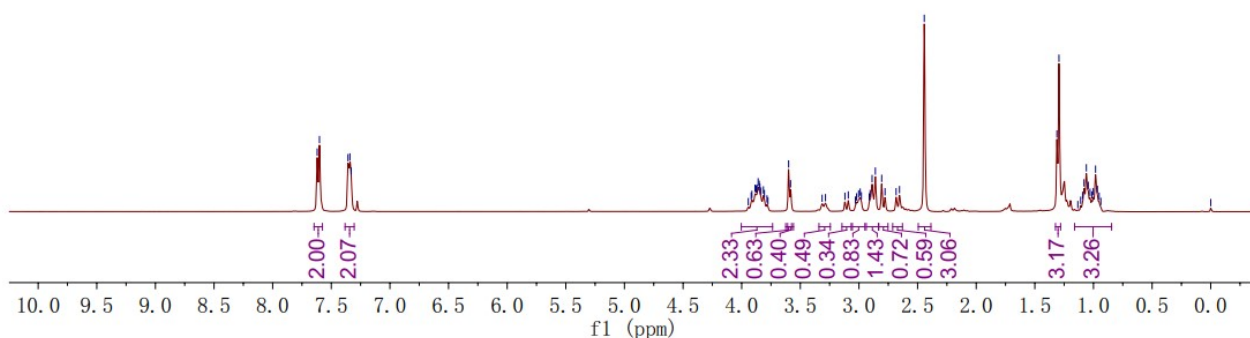



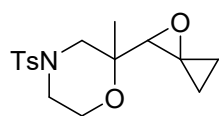

144.021  
143.919  
132.116  
131.693  
129.761  
127.796  
127.713

77.359  
77.041  
76.723  
73.126  
72.795  
62.101  
61.560  
60.502  
56.606  
55.376  
50.505  
50.451  
45.514  
45.407  
21.530  
19.228  
17.976  
3.727  
2.956  
2.474  
2.235

( $^{13}\text{C}$  NMR 100 MHz,  $\text{CDCl}_3$ )

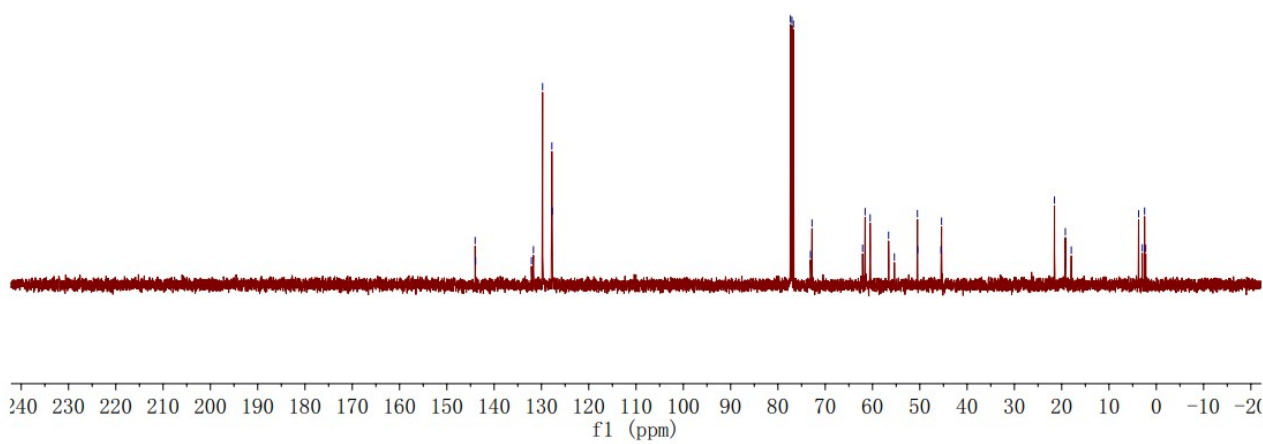

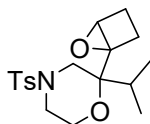

**Compound 7:** Yield: 33.0 mg, 94%; A colorless solid; Mp: 63 – 65 °C; Eluent: PE/EA = 2/1; <sup>1</sup>H NMR (400 MHz, CDCl<sub>3</sub>, TMS) δ 7.59 (d, *J* = 7.8 Hz, 2H), 7.34 (d, *J* = 7.8 Hz, 2H), 4.18 (s, 1H), 3.97 – 3.91 (m, 1H), 3.80 – 3.76 (m, 1H), 3.42 (d, *J* = 11.4 Hz, 1H), 3.32 (d, *J* = 11.5 Hz, 1H), 2.47 – 2.41 (m, 4H), 2.33 – 2.20 (m, 1H), 2.18 – 2.04 (m, 2H), 1.97 – 1.88 (m, 1H), 1.80 – 1.67 (m, 2H), 0.99 (d, *J* = 7.2 Hz, 3H), 0.96 (d, *J* = 7.2 Hz, 3H); <sup>13</sup>C NMR (100 MHz, CDCl<sub>3</sub>, TMS) δ 143.8, 132.0, 129.7, 127.6, 74.7, 64.1, 61.1, 59.8, 45.6, 45.3, 35.1, 27.8, 26.2, 21.5, 17.0, 16.8; IR (neat): ν 2938, 2872, 1594, 1448, 1348, 1091, 972, 757, 655 cm<sup>-1</sup>; HRMS (ESI-TOF) Calcd for C<sub>18</sub>H<sub>25</sub>NO<sub>4</sub>NaS [M+Na]<sup>+</sup>: 374.13965, found: 374.13956.

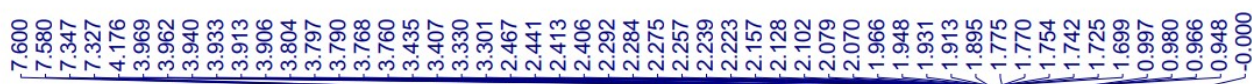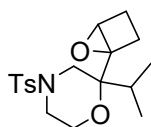

(<sup>1</sup>H NMR 400 MHz, CDCl<sub>3</sub>)

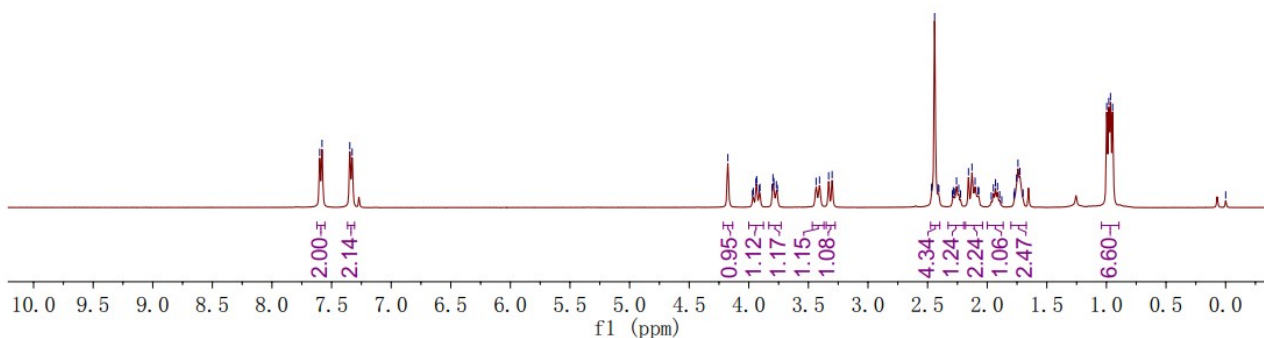

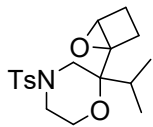

-143.820  
131.962  
129.739  
127.641

77.321  
77.004  
76.686  
74.671  
64.112  
61.082  
59.827  
45.562  
45.320  
35.090  
27.815  
26.195  
21.544  
16.977  
16.826

(<sup>13</sup>C NMR 100 MHz, CDCl<sub>3</sub>)

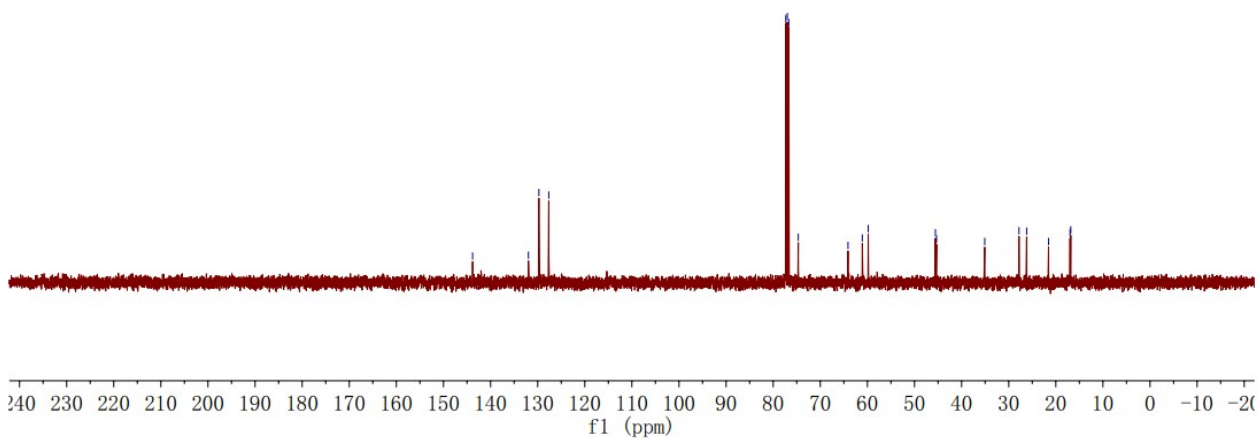

## 8 X-ray crystal data

X-ray crystal data of compound **2a**

Single crystals suitable for XRD were obtained by evaporation experiment:

Compound **2a** (50 mg) was dissolved in 0.5 mL of dichloromethane, and then 5 mL n-pentane was added, allowing this mixed solution evaporate slowly in a dry environment. Crystals were obtained in about 3-5 days with the evaporation of the solvent.

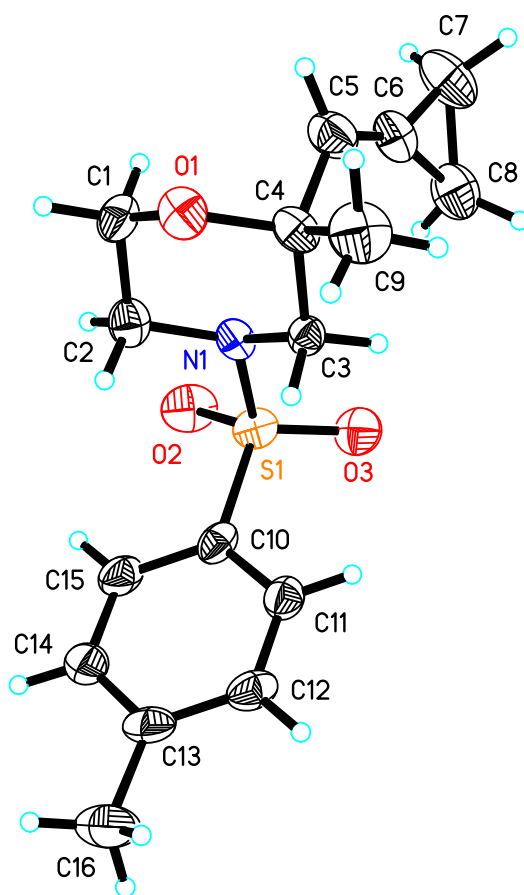

The crystal data of **2a** have been deposited in CCDC with number 1537103. Empirical Formula:  $C_{16}H_{21}NO_3S$ ; Formula Weight: 307.40; Crystal Color, Habit: colorless; Crystal Dimensions: 0.200 x 0.110 x 0.080 mm<sup>3</sup>; Crystal System: Monoclinic; Lattice Parameters:  $a = 11.797(6)\text{\AA}$ ,  $b = 6.533(3)\text{\AA}$ ,  $c = 11.917(6)\text{\AA}$ ,  $\alpha = 90^\circ$ ,  $\beta = 117.243(9)^\circ$ ,  $\gamma = 90^\circ$ ,  $V = 816.6(7)\text{\AA}^3$ ; Space group: P 21;  $Z = 2$ ;  $D_{calc} = 1.250\text{ g/cm}^3$ ;  $F_{000} = 328$ ; Final R indices [ $I > 2\sigma(I)$ ]  $R1 = 0.0891$ ,  $wR2 = 0.1649$ .

### X-ray crystal data of compound **2q'**

Single crystals suitable for XRD were obtained by evaporation experiment:

Compound **2q'** (50 mg) were dissolved in 0.5 mL of dichloromethane, and then 5 mL n-pentane was added, allowing this mixed solution evaporate slowly in a dry environment. Crystals were obtained in about 3-5 days with the evaporation of the solvent.

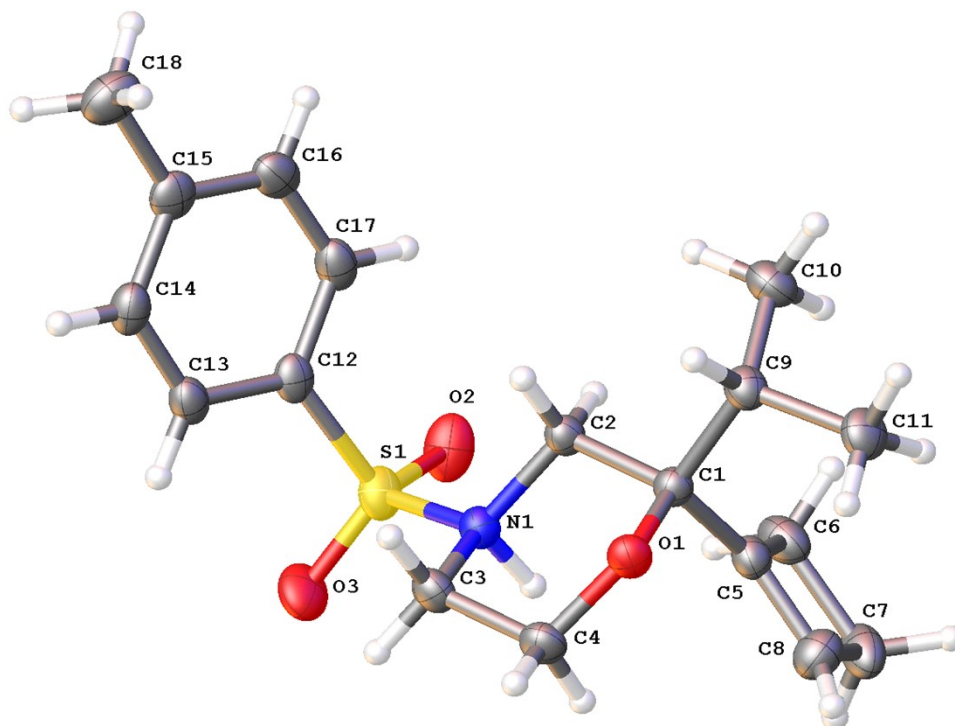

The crystal data of **2q'** have been deposited in CCDC with number 2178224. Empirical Formula:  $C_{18}H_{26}NO_3S$ ; Formula Weight: 336.46; Crystal Color, Habit: colorless; Crystal Dimensions: 0.07 x 0.07 x 0.05 mm<sup>3</sup>; Crystal System: Monoclinic; Lattice Parameters:  $a = 11.7615(3)\text{\AA}$ ,  $b = 7.0280(2)\text{\AA}$ ,  $c = 21.1943(6)\text{\AA}$ ,  $\alpha = 90^\circ$ ,  $\beta = 93.4420(10)^\circ$ ,  $\gamma = 90^\circ$ ,  $V = 1748.76(8)\text{\AA}^3$ ; Space group:  $P 1 21/n 1$ ;  $Z = 4$ ;  $D_{calc} = 1.278 \text{ g/cm}^3$ ;  $F_{000} = 724$ ; Final R indices [ $I > 2\sigma(I)$ ]  $R1 = 0.0641$ ,  $wR2 = 0.1811$ .

### X-ray crystal data of compound **3**

Single crystals suitable for XRD were obtained by evaporation experiment:

Compound **3** (50 mg) were dissolved in 0.5 mL of dichloromethane, and then 5 mL n-pentane was added, allowing this mixed solution evaporate slowly in a dry environment. Crystals were obtained in about 3-5 days with the evaporation of the solvent.

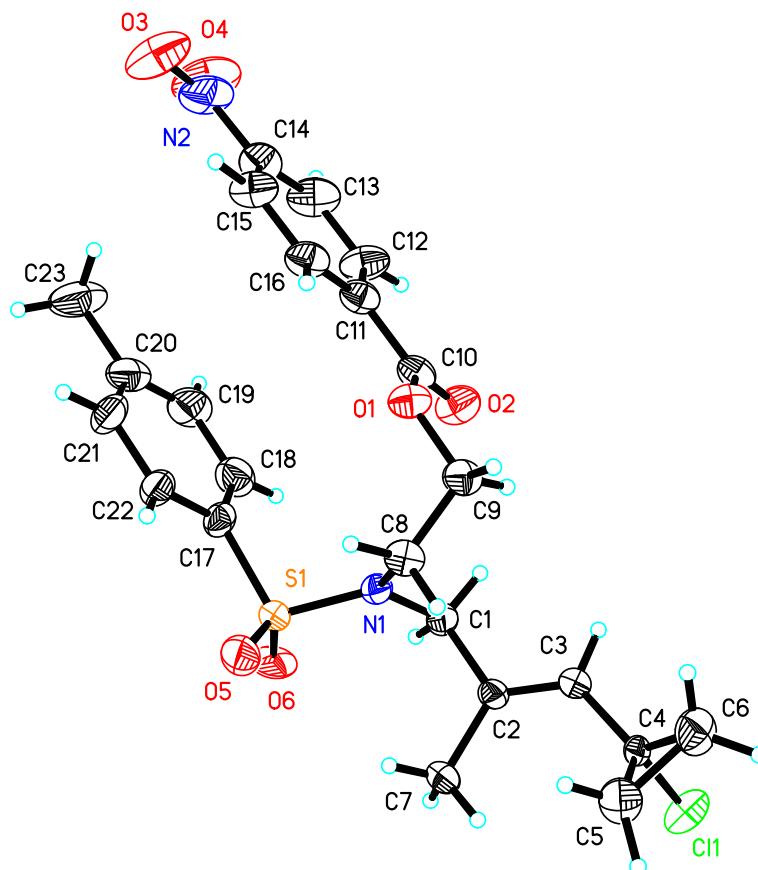

The crystal data of **3** have been deposited in CCDC with number 2178226. Empirical Formula:  $C_{23}H_{25}ClN_2O_6S$ ; Formula Weight: 492.96; Crystal Color, Habit: colorless; Crystal Dimensions: 0.150 x 0.100 x 0.050 mm<sup>3</sup>; Crystal System: Monoclinic; Lattice Parameters:  $a = 6.5010(10)\text{\AA}$ ,  $b = 7.4457(11)\text{\AA}$ ,  $c = 24.493(4)\text{\AA}$ ,  $\alpha = 90^\circ$ ,  $\beta = 95.467(6)^\circ$ ,  $\gamma = 90^\circ$ ,  $V = 1180.2(3)\text{\AA}^3$ ; Space group: P 21;  $Z = 2$ ;  $D_{calc} = 1.387\text{ g/cm}^3$ ;  $F_{000} = 516$ ; Final R indices [ $I > 2\sigma(I)$ ]  $R1 = 0.0948$ ,  $wR2 = 0.2520$ .

## 9 Calculation details

The geometries of compounds not involving Au atom have been optimized at B3LYP/6-31G(d) level; and the geometries of compounds involving Au atom have been optimized at B3LYP/6-31G(d)/SDD level. Geometry optimizations were conducted without any constraint using implicit solvation model (SMD) in THF ( $\epsilon = 7.4257$ ). The nature of all stationary points was verified through calculation of the vibrational frequency spectrum. Thermochemical corrections to 298.15 K have been calculated for all minima from unscaled vibrational frequencies obtained at this same level. The thermochemical corrections were calculated at SMD(THF)/B3LYP/6-31G(d)/SDD level to yield free energy  $G_{298, \text{THF}}$  at 298.15 K. All DFT calculations were performed with Gaussian 16 program.<sup>3</sup>

### Computational Energies

|                | $E_{\text{tot}}$ | $H_{298}$    | $G_{298}$    |
|----------------|------------------|--------------|--------------|
| <b>1a</b>      | -1300.803547     | -1300.434843 | -1300.516437 |
| <b>IntA-1a</b> | -3064.896189     | -3063.734220 | -3063.900285 |
| <b>IntC-1a</b> | -3064.895471     | -3063.733309 | -3063.898754 |
| <b>1q</b>      | -1379.430754     | -1379.002427 | -1379.088720 |
| <b>IntA-1q</b> | -3143.519232     | -3142.297750 | -3142.469338 |
| <b>IntC-1q</b> | -3143.520690     | -3142.298781 | -3142.470700 |

The total energies, enthalpies and free energies of all species in toluene calculated at SMD(THF)/B3LYP/6-31G(d)/SDD.

## Computational Coordinates

### 1a

Opt @ SMD(THF)/B3LYP/6-31G(d)/SDD

SCF Done: E(B3LYP) = -1300.80354707 a.u.

Zero-point correction = 0.344594 Hartree/Particle

Sum of electronic and thermal Free Energies = -1300.516437 a.u.

-----  
C 2.23117000 -1.22970700 -0.44149700  
C 4.70817900 -1.03976800 0.35724600  
C 6.15007800 -1.22781000 0.06808500  
C 5.68466900 -0.67517500 1.41110500  
C 1.58856000 -0.08124100 -1.20254400  
C 0.63037600 1.11022400 0.81644300  
C 1.35681500 2.45545300 0.75639500  
O 1.51455600 2.87780400 2.11116200  
C 1.39062800 -2.46768800 -0.21879100  
C 3.47908900 -1.13415900 -0.02939200  
N 0.41320500 0.45686800 -0.48141400  
C -2.29815100 0.13394700 -0.43613800  
C -2.49698600 -1.24729300 -0.54656200  
C -3.54550000 -1.83889500 0.14928500  
C -4.40608100 -1.07563300 0.95808300  
C -4.18732800 0.30442700 1.04540200  
C -3.14133400 0.91673900 0.35141600  
C -5.53986800 -1.73665200 1.70126300  
S -0.95652300 0.90109500 -1.34753400  
O -1.16837200 2.35814900 -1.28242100  
O -0.85523800 0.24998200 -2.66340700  
H 6.53830100 -2.24491000 0.03775700  
H 6.62595100 -0.54253500 -0.63198300  
H 5.84760300 0.38207400 1.61570300  
H 5.75911400 -1.32007000 2.28557200  
H 2.32552200 0.70758800 -1.38902900  
H 1.22844500 -0.43990600 -2.16979000  
H -0.33526900 1.24312800 1.31387600  
H 1.21318400 0.41836300 1.43330600  
H 2.33392500 2.33933600 0.26431000  
H 0.76576800 3.17435500 0.17492100  
H 1.95519800 3.74254000 2.09437600  
H 1.95151800 -3.24273100 0.31102500  
H 0.49266800 -2.23190600 0.36598800  
H 1.05090700 -2.88164500 -1.17843200  
H -1.84747300 -1.84812000 -1.17488300  
H -3.70409700 -2.91108400 0.06219300  
H -4.84432800 0.91362400 1.66072500  
H -2.98743700 1.98843400 0.41538200  
H -5.17203600 -2.54141700 2.34965200  
H -6.08260100 -1.01922600 2.32404800  
H -6.25640400 -2.18957700 1.00427000

### IntA-1a

Opt @ SMD(THF)/B3LYP/6-31G(d)/SDD

SCF Done: E(B3LYP) = -3064.89618883 a.u.

Zero-point correction = 1.098439 Hartree/Particle

Sum of electronic and thermal Free Energies = -3063.900285 a.u.



C -1.57528100 -1.03352300 0.80595300  
C -0.84809300 -1.04926000 3.32976800  
C -0.04007800 -0.88882700 4.55382500  
C -1.52210300 -1.21991300 4.64542200  
C -2.30860900 0.21720500 0.31117000  
C -4.32507000 -0.11028400 1.81134600  
C -4.26615100 1.15020200 2.67914200  
O -4.58778700 0.72762300 4.00504500  
C -1.83633400 -2.32485400 0.05136900  
C -1.02390600 -1.02330200 2.04735800  
N -3.76213000 0.01854100 0.45809200  
C -5.95346200 -0.71401000 -0.99686000  
C -5.53793500 -1.87148700 -1.66506700  
C -6.45496900 -2.89592900 -1.87766900  
C -7.78553000 -2.78551400 -1.43671900  
C -8.17362600 -1.61379300 -0.77356300  
C -7.26893900 -0.57375700 -0.55308500  
C -8.77345100 -3.89450200 -1.69786600  
S -4.78426600 0.61883200 -0.74611400  
O -5.53953900 1.78089300 -0.24838800  
O -3.95783000 0.76154800 -1.95540100  
H 0.67155300 -1.67559100 4.79823500  
H 0.28322400 0.11782600 4.81341100  
H -2.22628000 -0.44411600 4.94039200  
H -1.80166400 -2.23080200 4.93622800  
H -1.96339300 1.09639500 0.86353900  
H -2.10702000 0.37767900 -0.74780700  
H -5.36002300 -0.45418200 1.72799800  
H -3.77569800 -0.90902700 2.31980200  
H -3.26159000 1.59587900 2.64472900  
H -4.97991600 1.89623700 2.30978200  
H -4.70276400 1.52531700 4.54659800  
H -1.23195000 -3.14913800 0.43685700  
H -2.89453600 -2.59009000 0.16919800  
H -1.64327400 -2.20599100 -1.02006700  
H -4.51717100 -1.96680300 -2.02085300  
H -6.13693000 -3.79583100 -2.39807900  
H -9.19794300 -1.50883000 -0.42577800  
H -7.58090200 0.33429400 -0.04881600  
H -8.31658900 -4.87933700 -1.54943800  
H -9.64648500 -3.81580200 -1.04261300  
H -9.13319400 -3.85857800 -2.73497600  
C 3.38964500 2.01184500 -0.75409900  
C 3.95099400 0.72870100 -0.53274800  
C 5.35107000 0.57874200 -0.62011300  
C 6.19225700 1.64294000 -0.93307600  
C 5.64130300 2.89968800 -1.17402100  
C 4.26272400 3.06911500 -1.07973300  
C 1.94210000 2.41653800 -0.63030000  
C 1.09626700 2.42853700 -1.76844600  
C -0.16232900 3.03284000 -1.66743600  
C -0.61355100 3.64426200 -0.49101000  
C 0.22738200 3.59937400 0.62437200  
C 1.49727300 3.00362900 0.57996500  
H 5.80339600 -0.38947900 -0.44510300  
H 7.26519300 1.48368700 -0.99044500  
H 6.27611100 3.74485600 -1.42534700  
H 3.83479700 4.05281700 -1.24811900

H -0.80608200 3.05954100 -2.54348600  
H -0.09197200 4.06479900 1.55192800  
C 1.54690000 1.87760700 -3.12206900  
C 0.50345100 0.94981600 -3.77060600  
H 0.91152600 0.50576600 -4.68678300  
H 0.21527700 0.13249400 -3.09826200  
H -0.40910100 1.48915800 -4.04917000  
C -1.94931500 4.38351600 -0.49937100  
H -2.63311800 3.80115000 -1.13163800  
C -2.60447600 4.52990100 0.88071000  
H -3.60329300 4.96844100 0.77371300  
H -2.71795000 3.56276400 1.38459100  
H -2.02655900 5.19027100 1.53884100  
C -1.78438900 5.76831700 -1.16079400  
H -1.37420700 5.68329100 -2.17343900  
H -2.75191200 6.28069300 -1.22935300  
H -1.10597600 6.40163400 -0.57498900  
C 2.37902600 3.06867900 1.82917400  
H 3.29214800 2.49964800 1.63072000  
C 1.70483700 2.42445700 3.05430000  
H 0.79726800 2.96335700 3.35183600  
H 1.42763300 1.38405100 2.84641000  
H 2.38952800 2.42973700 3.91167200  
C 2.80506700 4.51643600 2.14132700  
H 3.47466300 4.53935000 3.01007800  
H 3.33483500 4.96871600 1.29519600  
H 1.93792200 5.14768500 2.37017400  
C 1.91944400 3.02234200 -4.08568400  
H 2.28054600 2.61933600 -5.04010300  
H 1.05127000 3.65873000 -4.29630700  
H 2.70830200 3.65746900 -3.66716700  
H 2.45328700 1.28529000 -2.95932800  
P 2.98651500 -0.81435400 -0.18534200  
C 4.02385900 -1.77047800 1.09118300  
C 3.12935200 -2.43746900 2.16189200  
C 5.03603800 -2.80245100 0.54032900  
H 4.58692800 -0.96796100 1.58702400  
C 3.96885200 -3.05809300 3.29110000  
H 2.51482300 -3.21780300 1.69127400  
H 2.43743800 -1.69994300 2.58362600  
C 5.87573700 -3.41152700 1.67822600  
H 4.49463300 -3.60591900 0.02628700  
H 5.70849600 -2.35444000 -0.19591300  
C 4.99791300 -4.05999500 2.75436800  
H 3.30054900 -3.54277400 4.01431100  
H 4.49068800 -2.25480600 3.83166500  
H 6.57163100 -4.14687500 1.25501700  
H 6.49043400 -2.62206200 2.13475500  
H 5.61961800 -4.44252300 3.57358600  
H 4.47373900 -4.92593500 2.32384000  
C 2.83781400 -1.69523600 -1.84580100  
C 4.12756900 -1.87600300 -2.67271800  
C 2.06161900 -3.02541300 -1.72578800  
H 2.19672200 -0.98974000 -2.39310600  
C 3.79526600 -2.44883200 -4.06304100  
H 4.80965300 -2.56380100 -2.16224200  
H 4.65261200 -0.92163300 -2.78315500  
C 1.75288400 -3.60712200 -3.11672000

H 2.65391200 -3.75095400 -1.15386200  
H 1.12688100 -2.86860300 -1.17247300  
C 3.02303100 -3.77094700 -3.96237800  
H 4.72631300 -2.59148000 -4.62599800  
H 3.19652900 -1.71690000 -4.62428200  
H 1.24165000 -4.57139700 -3.00166000  
H 1.05308700 -2.93816100 -3.63842800  
H 2.76504300 -4.13749000 -4.96399300  
H 3.66892600 -4.53416300 -3.50373900  
Au 0.76180900 -0.64897100 0.61469800

### IntC-1a

Opt @ SMD(THF)/B3LYP/6-31G(d)/SDD

SCF Done: E(B3LYP) = -3064.89547103 a.u.

Zero-point correction = 1.098916 Hartree/Particle

Sum of electronic and thermal Free Energies = -3063.898754 a.u.

-----  
C 3.67495900 0.67334500 1.75685700  
C 3.47394000 -0.71356000 1.54449400  
C 4.21645700 -1.63051100 2.31897500  
C 5.13953700 -1.21494700 3.27467000  
C 5.34367500 0.14821600 3.47927800  
C 4.61652600 1.06714900 2.72797000  
C 2.95723500 1.80420000 1.06770300  
C 3.52627900 2.41679900 -0.07530700  
C 2.92274100 3.57216600 -0.59247300  
C 1.79214600 4.15251300 -0.00997800  
C 1.25627100 3.53731900 1.12735400  
C 1.81751600 2.38133600 1.68529400  
H 4.08066900 -2.69610000 2.17664300  
H 5.69103700 -1.95379600 3.84900200  
H 6.05857300 0.49686900 4.21936400  
H 4.76773600 2.12930500 2.89479800  
H 3.36602400 4.05697400 -1.45910800  
H 0.39454900 3.98649400 1.61347600  
C 4.83140600 1.91608100 -0.69800200  
C 4.77601400 1.79265900 -2.23090400  
H 5.71222000 1.36107200 -2.60551400  
H 3.95495700 1.14355500 -2.55732600  
H 4.64996700 2.76618700 -2.71865500  
C 1.22240400 5.45532500 -0.56016300  
H 1.68703500 5.62056900 -1.54157500  
C -0.30077400 5.40939400 -0.76804500  
H -0.65012100 6.34153800 -1.22840600  
H -0.59233600 4.57961700 -1.42265300  
H -0.83502700 5.29184700 0.18224500  
C 1.61161800 6.64464500 0.34048800  
H 2.69936900 6.71808400 0.45522300  
H 1.25089300 7.58818300 -0.08746600  
H 1.17465300 6.54048600 1.34139400  
C 1.23718800 1.83310000 2.99140200  
H 1.69188500 0.85585100 3.18108600  
C -0.28488900 1.61825600 2.93430900  
H -0.83080200 2.56175400 2.81737600  
H -0.56207900 0.96299000 2.10118400  
H -0.63512500 1.15077000 3.86279500  
C 1.60632200 2.74596800 4.17801200  
H 1.22448700 2.32706100 5.11730500

H 2.69181200 2.85937000 4.27533700  
H 1.17343700 3.74634700 4.05552400  
C 6.01045700 2.81903300 -0.28082100  
H 6.95265500 2.43519700 -0.69138800  
H 5.87294200 3.84189500 -0.65233100  
H 6.11205300 2.86814700 0.80887000  
H 5.03368200 0.91668800 -0.29938700  
P 2.32963700 -1.46403300 0.29097700  
C 1.56686600 -2.94643400 1.20091300  
C 0.03752500 -3.00317300 0.99968100  
C 2.19332500 -4.33261000 0.92695200  
H 1.74587500 -2.69633200 2.25462600  
C -0.59806200 -4.08809800 1.88627400  
H -0.19123200 -3.20906900 -0.05522100  
H -0.40556300 -2.02797800 1.23504500  
C 1.55043300 -5.41139500 1.81697200  
H 2.04365700 -4.60167600 -0.12566000  
H 3.27280700 -4.32164400 1.10139700  
C 0.02897100 -5.46587500 1.63982300  
H -1.67952500 -4.12032400 1.70580500  
H -0.46423300 -3.81079400 2.94205900  
H 2.00058900 -6.38444100 1.58302600  
H 1.78753000 -5.19900000 2.86956900  
H -0.40714800 -6.20847500 2.31972200  
H -0.20654700 -5.79636200 0.61699000  
C 3.43579000 -1.93506100 -1.16726700  
C 4.74227500 -2.69798500 -0.86809300  
C 2.64045700 -2.61977500 -2.30169000  
H 3.72220200 -0.93519300 -1.52564000  
C 5.59459200 -2.81837000 -2.14538400  
H 4.51551900 -3.70378000 -0.49842900  
H 5.31802600 -2.18885100 -0.08862900  
C 3.50194900 -2.75397900 -3.56945900  
H 2.31919800 -3.61772400 -1.97874100  
H 1.72916000 -2.04949800 -2.52441300  
C 4.81930400 -3.48924400 -3.28721200  
H 6.50687600 -3.38417200 -1.91795800  
H 5.91681400 -1.81560000 -2.46178100  
H 2.92891200 -3.27782300 -4.34505400  
H 3.72376400 -1.75091900 -3.96282900  
H 5.43476900 -3.52350400 -4.19504400  
H 4.60142700 -4.53223800 -3.01427100  
Au 0.65972400 -0.11067000 -0.75476000  
C -2.36617500 1.13850000 -1.11323200  
C -0.16187400 1.05327400 -2.52962000  
C 0.74729900 1.95861500 -3.28144100  
C 0.19680600 0.68894900 -3.92727200  
C -2.77708100 0.51508800 0.20539400  
C -4.10599700 -1.36042900 -0.82121100  
C -3.42953700 -2.62339500 -0.27128800  
O -2.93677300 -3.35032700 -1.39966500  
C -3.39063700 2.00205200 -1.82183600  
C -1.16832600 0.99206000 -1.65468700  
N -4.06897700 -0.18241900 0.06033700  
C -6.72207300 -0.01214700 0.61547600  
C -7.07571900 1.21207000 0.03493000  
C -8.33476000 1.34894500 -0.53918400  
C -9.25388500 0.28386000 -0.54344400

C -8.87466600 -0.92653000 0.05027100  
 C -7.61516100 -1.08315900 0.63302600  
 C -10.61548500 0.45470600 -1.16911700  
 S -5.11561100 -0.18528000 1.38568400  
 O -5.09095000 -1.48842900 2.07416300  
 O -4.81251300 1.03254200 2.15401200  
 H 0.33440700 2.92407500 -3.56714000  
 H 1.80494400 1.96665800 -3.03821700  
 H 0.90396800 -0.12028900 -4.09147500  
 H -0.59723800 0.76402100 -4.66772800  
 H -1.98748400 -0.15617600 0.56543200  
 H -2.91833800 1.30106000 0.95164900  
 H -5.14569500 -1.56054100 -1.09695800  
 H -3.58636300 -1.07170800 -1.74064400  
 H -2.61082000 -2.34330000 0.40186900  
 H -4.14344800 -3.22444700 0.30376500  
 H -2.69460400 -4.23870400 -1.09178800  
 H -2.98694800 2.43951200 -2.73839900  
 H -4.28134700 1.41670500 -2.07529600  
 H -3.71085900 2.81691100 -1.15929100  
 H -6.38073500 2.04555900 0.03752900  
 H -8.61398800 2.29802900 -0.99007200  
 H -9.57238300 -1.75975300 0.06170500  
 H -7.33260300 -2.02076800 1.09910800  
 H -10.53188400 0.76015800 -2.21950200  
 H -11.19430300 -0.47293800 -1.12931700  
 H -11.18961000 1.23521800 -0.65391900

### 1q

Opt @ SMD(THF)/B3LYP/6-31G(d)/SDD

SCF Done: E(B3LYP) = -1379.43075420 a.u.

Zero-point correction = 0.401657 Hartree/Particle

Sum of electronic and thermal Free Energies = -1379.088720 a.u.

-----

C 2.13215400 -0.85168600 -0.36601400  
 C 4.56976700 -0.38198400 0.44090700  
 C 6.02781000 -0.45209400 0.18182400  
 C 5.48860900 0.15062400 1.47484000  
 C 1.42296500 0.20783100 -1.20001700  
 C 0.41872900 1.49545500 0.73836000  
 C 1.07563900 2.86735900 0.57335800  
 O 1.21772600 3.39638500 1.89198900  
 C 1.38243800 -2.15555000 -0.09013700  
 C 3.36199600 -0.62359600 0.04952800  
 N 0.22763300 0.73912100 -0.50654200  
 C -2.46460800 0.26179500 -0.41983500  
 C -2.61556300 -1.12858500 -0.48015500  
 C -3.62559000 -1.73384600 0.25977900  
 C -4.49461100 -0.97544900 1.06387900  
 C -4.32576300 0.41393600 1.09910000  
 C -3.31900500 1.03976400 0.36069300  
 C -5.58114900 -1.65190500 1.86170300  
 S -1.17158200 1.04590200 -1.38549500  
 O -1.46659100 2.48963800 -1.40681900  
 O -1.04039700 0.32088800 -2.65955400  
 H 6.51130300 -1.42670600 0.23218800  
 H 6.44959800 0.22239000 -0.56211800

H 5.54722500 1.23078500 1.60162100  
 H 5.60853000 -0.41804800 2.39590000  
 H 2.11983800 1.01741500 -1.44255300  
 H 1.07581100 -0.22264500 -2.14115000  
 H -0.54941500 1.61615900 1.23376200  
 H 1.03908900 0.88074300 1.39844600  
 H 2.05521000 2.76427700 0.08326300  
 H 0.44620500 3.51043400 -0.05476900  
 H 1.61417300 4.27840400 1.80783100  
 H 0.34868300 -1.87118800 0.15196200  
 H -1.96201900 -1.72595000 -1.10750400  
 H -3.74786200 -2.81312100 0.20997900  
 H -4.99221400 1.01974700 1.70755800  
 H -3.20631100 2.11823700 0.38299500  
 H -5.15574300 -2.34555700 2.59803500  
 H -6.19553300 -0.92344700 2.39930200  
 H -6.24068900 -2.24043600 1.21201700  
 C 1.33756100 -3.04302600 -1.35037100  
 H 0.73181200 -3.93896000 -1.16600800  
 H 0.90219700 -2.52008700 -2.20926600  
 H 2.34690300 -3.36907000 -1.63075000  
 C 1.94908500 -2.93629600 1.10117300  
 H 1.34503400 -3.83123800 1.29192000  
 H 2.97848800 -3.26293300 0.91069200  
 H 1.95288200 -2.32926400 2.01375600

**IntA-1q**

Opt @ SMD(THF)/B3LYP/6-31G(d)/SDD

SCF Done: E(B3LYP) = -3143.51923242 a.u.

Zero-point correction = 1.155251 Hartree/Particle

Sum of electronic and thermal Free Energies = -3142.469338 a.u.

-----

C -1.58765800 -1.07427500 0.65129900  
 C -0.82781300 -1.26980200 3.15707000  
 C -0.01154800 -1.21394800 4.38424900  
 C -1.50543700 -1.49295800 4.46295300  
 C -2.27471700 0.25120200 0.28796900  
 C -4.24169700 -0.03642900 1.86345700  
 C -4.11330100 1.19247600 2.76785300  
 O -4.38873200 0.73479200 4.09250300  
 C -1.95019100 -2.30953000 -0.18633900  
 C -1.00823200 -1.16190200 1.87836900  
 N -3.72911900 0.12813300 0.49440900  
 C -5.97564200 -0.51127800 -0.93687300  
 C -5.60544400 -1.62575700 -1.69891200  
 C -6.54407100 -2.62480800 -1.93673200  
 C -7.85244400 -2.53142500 -1.43004700  
 C -8.19549200 -1.40255400 -0.67472200  
 C -7.26852800 -0.38841700 -0.42673000  
 C -8.86363200 -3.61259100 -1.71818400  
 S -4.78107800 0.79217700 -0.64663400  
 O -5.50981200 1.93034600 -0.06302300  
 O -3.99053200 0.99256500 -1.87212100  
 H 0.66947900 -2.04043800 4.57959100  
 H 0.35100100 -0.23817000 4.70310000  
 H -2.17835900 -0.70993100 4.80795700  
 H -1.82180400 -2.50834500 4.69506000  
 H -1.85584700 1.05879100 0.89519800

H -2.11129300 0.50198800 -0.75856400  
H -5.28800300 -0.35139500 1.81214700  
H -3.69274000 -0.86402000 2.32273200  
H -3.09963500 1.61337900 2.70246000  
H -4.82354200 1.96701600 2.45508900  
H -4.44829100 1.51596900 4.66615100  
H -3.04245000 -2.38005200 -0.07224800  
H -4.60387200 -1.70724100 -2.10829400  
H -6.26089400 -3.49082900 -2.52985900  
H -9.20249400 -1.30969600 -0.27666300  
H -7.54759700 0.48804600 0.14771300  
H -8.42754700 -4.61014900 -1.59182500  
H -9.73534900 -3.53147200 -1.06154200  
H -9.22018300 -3.54622400 -2.75475700  
C 3.38590700 2.17593400 -0.53188300  
C 3.98073900 0.90035100 -0.36708800  
C 5.38874700 0.80401600 -0.39231300  
C 6.20572900 1.91390100 -0.58686600  
C 5.62252500 3.16618800 -0.76800400  
C 4.23600700 3.28190800 -0.73673200  
C 1.92157600 2.52925500 -0.46949300  
C 1.14297300 2.57917200 -1.65379400  
C -0.13012700 3.15796400 -1.60019400  
C -0.65812600 3.71144200 -0.42648000  
C 0.11513600 3.62395700 0.73412800  
C 1.39490100 3.04742500 0.73881100  
H 5.86742000 -0.15881200 -0.26584500  
H 7.28511000 1.79363700 -0.60006900  
H 6.23762900 4.04766400 -0.92629600  
H 3.78114500 4.25987500 -0.86201100  
H -0.72208800 3.21464500 -2.51058900  
H -0.26729100 4.03911500 1.66147700  
C 1.68887600 2.10558800 -3.00145300  
C 0.70564800 1.20228700 -3.76715900  
H 1.18015200 0.81642700 -4.67765900  
H 0.38814500 0.34467500 -3.16197700  
H -0.19532600 1.74494900 -4.07549500  
C -2.00325400 4.43201100 -0.48138000  
H -2.66135500 3.83262000 -1.12489600  
C -2.69721700 4.58848100 0.87816600  
H -3.69994300 5.00793300 0.73806000  
H -2.80773700 3.62904000 1.39627100  
H -2.14685700 5.26912000 1.53944500  
C -1.83995500 5.81105800 -1.15540900  
H -1.40230700 5.72095400 -2.15594000  
H -2.81260600 6.30826600 -1.25542700  
H -1.18651100 6.46086200 -0.55934000  
C 2.19657100 3.05469300 2.04255500  
H 3.13228300 2.51494600 1.86849200  
C 1.46184200 2.32499700 3.18238400  
H 0.52858800 2.83164400 3.45648700  
H 1.21601300 1.29545500 2.89630000  
H 2.09364600 2.28817600 4.07879300  
C 2.57056900 4.48759600 2.46872400  
H 3.18433700 4.46855700 3.37785000  
H 3.14139500 5.00137300 1.68692900  
H 1.67732200 5.08746100 2.68111800  
C 2.10671000 3.30462200 -3.87640700

H 2.53483100 2.95740700 -4.82504200  
 H 1.24441500 3.94123500 -4.10936800  
 H 2.85720700 3.92534000 -3.37429400  
 H 2.59120600 1.51587700 -2.80888900  
 P 3.07141200 -0.70403100 -0.16869700  
 C 4.09386400 -1.66681000 1.11740300  
 C 3.18831100 -2.40354800 2.13011500  
 C 5.17284100 -2.63672600 0.58149200  
 H 4.60163200 -0.85828000 1.66027800  
 C 4.01053500 -3.01387400 3.27793200  
 H 2.63285900 -3.19921400 1.61420600  
 H 2.44474200 -1.71114200 2.54007300  
 C 5.99751900 -3.23270800 1.73691800  
 H 4.68871300 -3.45316600 0.03251500  
 H 5.84771800 -2.14212300 -0.12217100  
 C 5.10989700 -3.94944000 2.76078900  
 H 3.33891500 -3.55165700 3.95934400  
 H 4.46830700 -2.20141900 3.86114900  
 H 6.74336200 -3.92413400 1.32486900  
 H 6.55563200 -2.42702600 2.23573500  
 H 5.71604700 -4.32193700 3.59613000  
 H 4.64744700 -4.82868800 2.28851800  
 C 3.07646600 -1.49115500 -1.88466900  
 C 4.40379100 -1.48281700 -2.67059000  
 C 2.44944400 -2.90252700 -1.87456600  
 H 2.38062300 -0.82504600 -2.41520900  
 C 4.18006400 -2.00029200 -4.10368000  
 H 5.13990000 -2.12271300 -2.17126600  
 H 4.82508600 -0.47328600 -2.70736600  
 C 2.23909800 -3.41813300 -3.30874600  
 H 3.10825600 -3.59671800 -1.33850400  
 H 1.49455600 -2.88984400 -1.33607700  
 C 3.54440300 -3.39678800 -4.11591500  
 H 5.13931400 -2.01185400 -4.63651500  
 H 3.52878100 -1.29810600 -4.64402800  
 H 1.82716900 -4.43472600 -3.27291500  
 H 1.48985000 -2.79019100 -3.81234100  
 H 3.35611300 -3.71864700 -5.14793200  
 H 4.25042500 -4.12098000 -3.68342400  
 Au 0.79133900 -0.70347200 0.51353200  
 C -1.34562000 -3.61474300 0.34063100  
 H -1.70791600 -4.45789800 -0.25801700  
 H -0.25044400 -3.60405800 0.27660100  
 H -1.62248100 -3.80058000 1.38364700  
 C -1.66453200 -2.12660300 -1.68632900  
 H -2.03404300 -2.99677400 -2.24111100  
 H -2.15138100 -1.23828100 -2.09978900  
 H -0.58790700 -2.04388800 -1.87358700

**IntC-1q**

Opt @ SMD(THF)/B3LYP/6-31G(d)/SDD

SCF Done: E(B3LYP) = -3143.52068970 a.u.

Zero-point correction = 1.156018 Hartree/Particle

Sum of electronic and thermal Free Energies = -3142.470700 a.u.

-----  
 C 3.80443300 0.46826700 1.79223400  
 C 3.54463600 -0.89813500 1.52247500  
 C 4.26029200 -1.87759200 2.24415200



C 5.20978400 -1.54302300 3.20538200  
C 5.46802900 -0.19964500 3.47084900  
C 4.77004700 0.77985100 2.77035500  
C 3.14055200 1.66450200 1.16101800  
C 3.74914000 2.30901600 0.05703200  
C 3.23350600 3.53901700 -0.37517200  
C 2.14862400 4.15921900 0.25101400  
C 1.55792900 3.49916300 1.33498500  
C 2.03423000 2.27044200 1.81008000  
H 4.08043700 -2.92925200 2.05573800  
H 5.73880100 -2.32845200 3.73744500  
H 6.20293100 0.08665900 4.21801200  
H 4.96472600 1.82690600 2.98233900  
H 3.71186700 4.04776000 -1.20877900  
H 0.72327800 3.96910800 1.84839100  
C 4.99953900 1.74928600 -0.62407200  
C 4.87964500 1.69624100 -2.15773100  
H 5.76458600 1.21102100 -2.58744400  
H 3.99751800 1.12790600 -2.47598900  
H 4.81146000 2.69744700 -2.59891000  
C 1.68305200 5.53973500 -0.19834200  
H 2.19809200 5.76149300 -1.14271100  
C 0.16997300 5.60715300 -0.46657100  
H -0.10578400 6.59697900 -0.85012000  
H -0.13788800 4.86001800 -1.20732000  
H -0.40920300 5.43543000 0.44856300  
C 2.10229300 6.61867700 0.81972700  
H 3.18605300 6.61120900 0.98464000  
H 1.82021400 7.61684800 0.46243800  
H 1.61387400 6.45874800 1.78895900  
C 1.39373200 1.66373400 3.06058400  
H 1.82109200 0.66760800 3.21108300  
C -0.12847300 1.48489800 2.92301100  
H -0.64777200 2.44529000 2.82335600  
H -0.37713300 0.87510100 2.04672000  
H -0.53282600 0.98253800 3.81053200  
C 1.72893900 2.49673000 4.31349700  
H 1.30237900 2.02929800 5.20963200  
H 2.81165500 2.58223700 4.46026500  
H 1.31935100 3.51129700 4.23672800  
C 6.25287700 2.54856700 -0.21451500  
H 7.15072500 2.11777500 -0.67493800  
H 6.17710500 3.59374800 -0.53855200  
H 6.39460600 2.54294200 0.87190600  
H 5.14300700 0.72191400 -0.27426900  
P 2.35315700 -1.55539700 0.26099400  
C 1.54743300 -3.03460200 1.14107600  
C 0.01274800 -3.01832700 0.98037600  
C 2.10224300 -4.43815100 0.80765000  
H 1.76418200 -2.82759100 2.19694400  
C -0.64542800 -4.09378100 1.86167200  
H -0.24981700 -3.19110600 -0.07250300  
H -0.38113400 -2.03047000 1.24648900  
C 1.43612100 -5.51283500 1.68609400  
H 1.91008200 -4.66707100 -0.24775300  
H 3.18585600 -4.48127200 0.94922000  
C -0.09172100 -5.49171500 1.55956000  
H -1.73268700 -4.07003000 1.71846500

H -0.46293800 -3.85008100 2.91848000  
H 1.83165100 -6.49827100 1.40912100  
H 1.71694900 -5.34408200 2.73581400  
H -0.53919500 -6.23186000 2.23470600  
H -0.37643900 -5.78379500 0.53758800  
C 3.41989200 -2.01848300 -1.22844800  
C 4.70363100 -2.83578100 -0.97802900  
C 2.58142900 -2.63766700 -2.36863400  
H 3.73506600 -1.01774700 -1.56016000  
C 5.52724700 -2.94702600 -2.27495500  
H 4.44774200 -3.84375500 -0.63342700  
H 5.31204100 -2.37117100 -0.19560500  
C 3.41382900 -2.76039600 -3.65650600  
H 2.23034600 -3.63368400 -2.07115400  
H 1.68843600 -2.02752400 -2.55524400  
C 4.70796400 -3.55173100 -3.42295900  
H 6.42186700 -3.55264800 -2.08272800  
H 5.88072000 -1.94712300 -2.56598900  
H 2.80804900 -3.23705200 -4.43761900  
H 3.66467000 -1.75304400 -4.02059800  
H 5.30594500 -3.57851300 -4.34266000  
H 4.45651300 -4.59458200 -3.17982500  
Au 0.72333200 -0.10830800 -0.70729500  
C -2.33457700 1.14394800 -0.97132500  
C -0.09453700 1.23161100 -2.34966900  
C 0.84546000 2.20385600 -2.97546100  
C 0.29972900 1.02229800 -3.77116300  
C -2.69348600 0.29945100 0.24207600  
C -4.01272400 -1.41008700 -1.05183500  
C -3.22778100 -2.70751400 -0.78530600  
O -2.44519200 -2.98345400 -1.95275600  
C -3.40632700 2.10013100 -1.51231800  
C -1.14003700 1.10076200 -1.53308700  
N -3.97034300 -0.40464700 0.02281800  
C -6.58872200 -0.35465400 0.77636500  
C -6.96864700 0.97944400 0.58459600  
C -8.25837900 1.25882600 0.14603200  
C -9.18267000 0.22848300 -0.10392700  
C -8.77600500 -1.09596900 0.10043200  
C -7.48568000 -1.39686400 0.54212700  
C -10.58097800 0.55388100 -0.56541300  
S -4.93963100 -0.71898300 1.37124600  
O -4.89728100 -2.15294000 1.70935900  
O -4.57033200 0.27355500 2.39278700  
H 0.44860200 3.19877600 -3.16660300  
H 1.89594700 2.17547500 -2.70382900  
H 1.00020000 0.22424900 -4.00425600  
H -0.46945200 1.19332400 -4.52112600  
H -1.87596500 -0.40193200 0.45127000  
H -2.82144100 0.93547700 1.12050200  
H -5.06095500 -1.62016900 -1.28219100  
H -3.58579000 -0.93331200 -1.93957200  
H -2.58568800 -2.58043400 0.09315900  
H -3.91439300 -3.53726700 -0.57683100  
H -2.09074800 -3.88297600 -1.86042600  
H -4.34213900 1.52762300 -1.50704400  
H -6.27125800 1.78672600 0.78346500  
H -8.55798600 2.29346400 -0.00169200

H -9.47700600 -1.90587900 -0.08320300  
H -7.18384100 -2.42487200 0.70992100  
H -10.56661400 1.21850600 -1.43760200  
H -11.13533900 -0.35078100 -0.83291300  
H -11.14230300 1.07213700 0.22288600  
C -3.58591700 3.29537300 -0.55504900  
H -2.68309900 3.91775200 -0.53529900  
H -4.42107900 3.92120800 -0.89168000  
H -3.79957500 2.97610200 0.47058200  
C -3.14914600 2.57946300 -2.94471800  
H -2.24211800 3.19221900 -3.01092700  
H -3.04860500 1.73860100 -3.64027100  
H -3.98850500 3.19682600 -3.28449100

## 10 References

1. (a) W. Yuan, X. Tang, Y. Wei and M. Shi, Gold-Catalyzed Cycloisomerization of Yne-Vinylidenecyclopropanes: A Three-Carbon Synthon for [3+2] Cycloadditions, *Chem. Eur. J.*, 2014, **20**, 3198-3204; (b) S. Yang, K.-H. Rui, X.-Y. Tang, Q. Xu and M. Shi, Rhodium/Silver Synergistic Catalysis in Highly Enantioselective Cycloisomerization/Cross Coupling of Keto-Vinylidenecyclopropanes with Terminal Alkynes, *J. Am. Chem. Soc.*, 2017, **139**, 5957-5964.
2. M. Jiang and M. Shi, Palladium-Catalyzed Diacetoxylation of Methylene-cyclopropanes via C(sp<sup>3</sup>)-C(sp<sup>3</sup>) Bond Breaking, *Organometallics*, 2009, **28**, 5600-5602.
3. Gaussian 16, Revision A.03, M. J. Frisch, G. W. Trucks, H. B. Schlegel, G. E. Scuseria, M. A. Robb, J. R. Cheeseman, G. Scalmani, V. Barone, G. A. Petersson, H. Nakatsuji, X. Li, M. Caricato, A. V. Marenich, J. Bloino, B. G. Janesko, R. Gomperts, B. Mennucci, H. P. Hratchian, J. V. Ortiz, A. F. Izmaylov, J. L. Sonnenberg, D. Williams-Young, F. Ding, F. Lipparini, F. Egidi, J. Goings, B. Peng, A. Petrone, T. Henderson, D. Ranasinghe, V. G. Zakrzewski, J. Gao, N. Rega, G. Zheng, W. Liang, M. Hada, M. Ehara, K. Toyota, R. Fukuda, J. Hasegawa, M. Ishida, T. Nakajima, Y. Honda, O. Kitao, H. Nakai, T. Vreven, K. Throssell, J. A. Montgomery, Jr., J. E. Peralta, F. Ogliaro, M. J. Bearpark, J. J. Heyd, E. N. Brothers, K. N. Kudin, V. N. Staroverov, T. A. Keith, R. Kobayashi, J. Normand, K. Raghavachari, A. P. Rendell, J. C. Burant, S. S. Iyengar, J. Tomasi, M. Cossi, J. M. Millam, M. Klene, C. Adamo, R. Cammi, J. W. Ochterski, R. L. Martin, K. Morokuma, O. Farkas, J. B. Foresman, and D. J. Fox, Gaussian, Inc., Wallingford CT, 2016.
